# Supplementary material for: Relapse prevention group therapy via video-conferencing for substance use disorder: protocol for a multicentre randomised controlled trial in Indonesia
Source: PubMed Central journal article supplement — BMJ Open. 2021 Sep 6;11(9):e050259. doi: 10.1136/bmjopen-2021-050259 (PMC8422497; doi:10.1136/bmjopen-2021-050259), 2021-09-06
Supplement: bmjopen-2021-050259.draft_revisions.pdf [file bmjopen-2021-050259.draft_revisions.pdf]

# BMJ Open

BMJ Open is committed to open peer review. As part of this commitment we make the peer review history of every article we publish publicly available.

When an article is published we post the peer reviewers' comments and the authors' responses online. We also post the versions of the paper that were used during peer review. These are the versions that the peer review comments apply to.

The versions of the paper that follow are the versions that were submitted during the peer review process. They are not the versions of record or the final published versions. They should not be cited or distributed as the published version of this manuscript.

BMJ Open is an open access journal and the full, final, typeset and author-corrected version of record of the manuscript is available on our site with no access controls, subscription charges or pay-per-view fees (<http://bmjopen.bmj.com>).

If you have any questions on BMJ Open's open peer review process please email [info.bmjopen@bmj.com](mailto:info.bmjopen@bmj.com)

# BMJ Open

## Relapse prevention group therapy via video-conferencing for substance use disorder: protocol for a multicentre randomised controlled trial in Indonesia

|                               |                                                                                                                                                                                                                                                                                                                                                                                                                                                                                                                                                                                                                                                                                                                                                                                                                                                                                                                                                                                                                                                        |
|-------------------------------|--------------------------------------------------------------------------------------------------------------------------------------------------------------------------------------------------------------------------------------------------------------------------------------------------------------------------------------------------------------------------------------------------------------------------------------------------------------------------------------------------------------------------------------------------------------------------------------------------------------------------------------------------------------------------------------------------------------------------------------------------------------------------------------------------------------------------------------------------------------------------------------------------------------------------------------------------------------------------------------------------------------------------------------------------------|
| Journal:                      | <i>BMJ Open</i>                                                                                                                                                                                                                                                                                                                                                                                                                                                                                                                                                                                                                                                                                                                                                                                                                                                                                                                                                                                                                                        |
| Manuscript ID                 | bmjopen-2021-050259                                                                                                                                                                                                                                                                                                                                                                                                                                                                                                                                                                                                                                                                                                                                                                                                                                                                                                                                                                                                                                    |
| Article Type:                 | Protocol                                                                                                                                                                                                                                                                                                                                                                                                                                                                                                                                                                                                                                                                                                                                                                                                                                                                                                                                                                                                                                               |
| Date Submitted by the Author: | 15-Feb-2021                                                                                                                                                                                                                                                                                                                                                                                                                                                                                                                                                                                                                                                                                                                                                                                                                                                                                                                                                                                                                                            |
| Complete List of Authors:     | <p>Yamada, Chika; Kyoto University, Department of Environmental Coexistence, Center for Southeast Asian Studies</p> <p>Siste, Kristiana; Universitas Indonesia, Department of Psychiatry, Faculty of Medicine</p> <p>Hanafi, Enjeline; Universitas Indonesia, Department of Psychiatry, Faculty of Medicine,</p> <p>Ophinni, Youdiil; Ragon Institute</p> <p>Beatrice, Evania; Universitas Indonesia, Department of Psychiatry, Faculty of Medicine</p> <p>Rafelia, Vania; Universitas Indonesia, Department of Psychiatry, Faculty of Medicine</p> <p>Alison, Peter; Universitas Indonesia, Department of Psychiatry, Faculty of Medicine</p> <p>Prabowo, Albert; Universitas Indonesia, Department of Psychiatry, Faculty of Medicine</p> <p>Shinozaki, Tomohiro; Tokyo University of Science, Department of Information and Computer Technology</p> <p>Matsumoto, Toshihiko; NCNP, Department of Drug Dependence Research</p> <p>Sakamoto, Ryota; Kyoto University, Department of Environmental Coexistence, Center for Southeast Asian Studies</p> |
| Keywords:                     | Substance misuse < PSYCHIATRY, Telemedicine < BIOTECHNOLOGY & BIOINFORMATICS, PSYCHIATRY, Clinical trials < THERAPEUTICS                                                                                                                                                                                                                                                                                                                                                                                                                                                                                                                                                                                                                                                                                                                                                                                                                                                                                                                               |
|                               |                                                                                                                                                                                                                                                                                                                                                                                                                                                                                                                                                                                                                                                                                                                                                                                                                                                                                                                                                                                                                                                        |

SCHOLARONE™  
Manuscripts

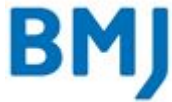

I, the Submitting Author has the right to grant and does grant on behalf of all authors of the Work (as defined in the below author licence), an exclusive licence and/or a non-exclusive licence for contributions from authors who are: i) UK Crown employees; ii) where BMJ has agreed a CC-BY licence shall apply, and/or iii) in accordance with the terms applicable for US Federal Government officers or employees acting as part of their official duties; on a worldwide, perpetual, irrevocable, royalty-free basis to BMJ Publishing Group Ltd ("BMJ") its licensees and where the relevant Journal is co-owned by BMJ to the co-owners of the Journal, to publish the Work in this journal and any other BMJ products and to exploit all rights, as set out in our [licence](#).

The Submitting Author accepts and understands that any supply made under these terms is made by BMJ to the Submitting Author unless you are acting as an employee on behalf of your employer or a postgraduate student of an affiliated institution which is paying any applicable article publishing charge ("APC") for Open Access articles. Where the Submitting Author wishes to make the Work available on an Open Access basis (and intends to pay the relevant APC), the terms of reuse of such Open Access shall be governed by a Creative Commons licence – details of these licences and which [Creative Commons](#) licence will apply to this Work are set out in our licence referred to above.

Other than as permitted in any relevant BMJ Author's Self Archiving Policies, I confirm this Work has not been accepted for publication elsewhere, is not being considered for publication elsewhere and does not duplicate material already published. I confirm all authors consent to publication of this Work and authorise the granting of this licence.

1  
2  
3 **1 Title**  
4

5 2 Relapse prevention group therapy via video-conferencing for substance use disorder: protocol for  
6  
7  
8 3 a multicentre randomised controlled trial in Indonesia  
9

10  
11  
12 **5 Author names and affiliations**  
13

14 6 Chika Yamada <sup>1\*</sup>, Kristiana Siste <sup>2\*</sup>, Enjeline Hanafi <sup>2\*</sup>, Youdiil Ophinni <sup>3\*</sup>, Evania Beatrice <sup>2</sup>,  
15  
16  
17 7 Vania Rafelia <sup>2</sup>, Peter Alison <sup>2</sup>, Albert Prabowo <sup>2</sup>, Tomohiro Shinozaki <sup>4</sup>, Toshihiko Matsumoto <sup>5</sup>,  
18  
19 8 Ryota Sakamoto <sup>1</sup>  
20

21  
22 9  
23  
24 10 <sup>1</sup> Department of Environmental Coexistence, Center for Southeast Asian Studies, Kyoto  
25  
26 11 University, Kyoto, Japan

27  
28 12 <sup>2</sup> Department of Psychiatry, Faculty of Medicine, Universitas Indonesia, Jakarta, Indonesia  
29

30  
31 13 <sup>3</sup> Ragon Institute of MGH, MIT and Harvard, Cambridge, USA  
32

33 14 <sup>4</sup> Department of Information and Computer Technology, Faculty of Engineering, Tokyo  
34  
35 15 University of Science, Tokyo, Japan  
36

37  
38 16 <sup>5</sup> Department of Drug Dependence Research, National Center of Neurology and Psychiatry,  
39  
40 17 Tokyo, Japan  
41

42 18 \*These authors contributed equally to this work.  
43  
44

45 19

46  
47 **20 E-mail address**  
48

49 21 Chika Yamada: [chika128@cseas.kyoto-u.ac.jp](mailto:chika128@cseas.kyoto-u.ac.jp)  
50

51 22 Kristiana Siste: [ksiste@yahoo.com](mailto:ksiste@yahoo.com)  
52

53  
54 23 Enjeline Hanafi: [enjelinehanafi@gmail.com](mailto:enjelinehanafi@gmail.com)  
55  
56  
57  
58  
59  
60

1  
2  
3 24 Youdiil Ophinni: yophinni@mgh.harvard.edu  
4

5 25 Albert Prabowo: albert.lorenz@yahoo.com  
6

7  
8 26 Evania Beatrice: btricevania@gmail.com  
9

10 27 Vania Rafelia: vaniarafelia@gmail.com  
11

12 28 Peter Alison: p\_ter\_alison@hotmail.com  
13

14 29 Tomohiro Shinozaki: shinozaki@rs.tus.ac.jp  
15

16 30 Toshihiko Matsumoto: tmatsu@ncnp.go.jp  
17

18 31 Ryota Sakamoto: sakamoto65@cseas.kyoto-u.ac.jp  
19  
20  
21  
22  
23

24 33 **Corresponding author**

25  
26 34 Chika Yamada  
27

28 35 E-mail address: chika128@cseas.kyoto-u.ac.jp  
29

30 36 Postal address: 46 Yoshidashimoadachicho, Sakyo Ward, Kyoto, 606-8304, Japan  
31  
32  
33  
34

35 38 Abstract: 296 words  
36

37 39 Main text: 4,998 words  
38  
39  
40  
41  
42  
43  
44  
45  
46  
47  
48  
49  
50  
51  
52  
53  
54  
55  
56  
57  
58  
59  
60

## 40 Abstract

41 **Background:** Substance use disorder (SUD) is a leading contributor to the global burden of  
42 disease. In Indonesia, treatment availability falls below the expected coverage for people with  
43 SUD needing care. An effective therapeutic option for SUD with potential for widespread  
44 implementation is urgently needed, yet evidence-based data in the country is scarce. Here, we  
45 developed a cognitive behavioural therapy (CBT)-based group telemedicine model and proposed  
46 to investigate the effectiveness and implementability for providers, in a multicentre randomised  
47 controlled trial (RCT).

48 **Methods:** Participants will be recruited from the communities across Indonesia. Recruitment will  
49 be done through the social networks of eight sites: three hospitals, two primary healthcare centres,  
50 and three rehabilitation centres. The intervention is a relapse prevention program called Indo-  
51 DARPP, a newly-developed 12-week module based on CBT and motivational interviewing  
52 constructed in the Indonesian context. The program is delivered in a group therapy via video-  
53 conferencing—intervention will be given in addition to treatment as usual. Control comparison is  
54 treatment as usual only. A total of 160 participants will be randomly divided by half into the  
55 intervention and control group. The primary outcome is the increase of percent days of abstinence  
56 from the primarily used substance in the past 30 days. Secondary outcomes include addiction  
57 severity, quality of life, motivation to change, psychiatric symptoms, cognitive function, and stress  
58 coping mechanisms. Assessments will be done at baseline (week 0), post-treatment (week 13), and  
59 follow-up (week 24). Retention, participant satisfaction, and cost-effectiveness will be assessed as  
60 implementation outcomes.

61 **Ethics and dissemination:** The study protocol was reviewed and approved by the Ethics  
62 Committees in Universitas Indonesia and Kyoto University. Provided positive outcomes, the

1  
2  
3 63 treatment program will be advocated to the Indonesian government for adoption as a healthcare-  
4  
5 64 based approach to tackle substance use epidemic in the country.  
6  
7

8 65 **Trial registration number:** UMIN000042186  
9

10  
11 66 **Keywords:** *substance use disorder, telemedicine, online therapy, cognitive behavioural therapy,*  
12  
13 67 *relapse prevention, motivational interviewing, low- and middle- income country*  
14  
15

16 68  
17  
18  
19  
20  
21  
22  
23  
24  
25  
26  
27  
28  
29  
30  
31  
32  
33  
34  
35  
36  
37  
38  
39  
40  
41  
42  
43  
44  
45  
46  
47  
48  
49  
50  
51  
52  
53  
54  
55  
56  
57  
58  
59  
60

1  
2  
3 **69 Strengths and limitations of this study**  
4  
5

- 6 70 ● The proposed study will be the first to establish high-quality evidence for a cognitive  
7  
8 71 behavioural therapy (CBT)-based relapse prevention program for substance use disorder  
9  
10 72 (SUD) in Indonesia.  
11  
12  
13 73 ● Telemedicine enables far-reaching nationwide participation, connecting participants with  
14  
15 74 providers in major cities, which in this study will include providers from three different  
16  
17 75 levels of health care: tertiary hospitals, primary healthcare centres, and rehabilitation  
18  
19 76 centres.  
20  
21  
22 77 ● A successful outcome may produce a new SUD treatment module in Indonesia and pave  
23  
24 78 way for adoption into the national guideline.  
25  
26  
27 79 ● Study limitations include risk of recall and social desirability bias, heterogeneous control  
28  
29 80 condition, and possible variability in treatment provision.  
30

31  
32 81  
33  
34  
35  
36  
37  
38  
39  
40  
41  
42  
43  
44  
45  
46  
47  
48  
49  
50  
51  
52  
53  
54  
55  
56  
57  
58  
59  
60



## 82 Introduction

83 Substance use disorder (SUD) is a condition characterised by the inability to control the  
84 use of psychoactive substances, i.e., alcohol and psychotropic drugs, which disrupts daily living.  
85 SUD remains a major and growing health problem worldwide. According to the Global Burden of  
86 Disease (GBD) survey in 2016, SUD globally contributes to 131 million disability-adjusted life  
87 years (DALY), or 5.5% of all DALYs,<sup>1</sup> and this number has been increasing since the 1990s.<sup>2</sup>  
88 While substance use itself is more widespread in high-income countries (HICs), low- and middle-  
89 income countries (LMICs) are disproportionately burdened. Absolute mortality rate due to SUD  
90 was greatest in LMICs with large populations,<sup>3</sup> and people with economic disadvantage are more  
91 likely to develop SUD.<sup>4</sup> Most importantly, substantial treatment gaps exist in limited-resource  
92 settings, where the number of people with SUD in need of health care far exceeds the availability  
93 of treatment services<sup>5–7</sup>—merely 1% of people with SUD in LMICs received treatment above the  
94 minimal standard.<sup>8</sup>

95 In Indonesia, the world's third most populous LMIC, the national SUD prevalence was  
96 estimated at 1.8% or 3.3 million people, with the most used substance being marijuana (68%),  
97 followed by amphetamine-type stimulants (ATS, 42%), opioids (38%) and sedatives (35%).<sup>9,10</sup> Its  
98 strategic intercontinental location contributes to the country's infamous reputation as a marijuana  
99 exporter and drug trafficking hub.<sup>11</sup> While there is an 80% decrease of injecting drug use (IDU)  
100 from 2002 to 2016,<sup>10</sup> an increasing use of psychoactive medications out of prescription has been  
101 noted, particularly benzodiazepines.<sup>12</sup> Similar to other Muslim majority countries,<sup>13</sup> alcohol  
102 consumption is comparatively low in Indonesia—prevalence estimate of alcohol use disorder was  
103 0.8% in 2016, much lower than the overall rate in Southeast Asia (3.9%).<sup>14</sup> New psychoactive  
104 substances (NPS) has also entered the country in the last decade.<sup>15</sup> The current COVID-19

1  
2  
3 105 pandemic may also further complicate the SUD situation in Indonesia, as observed elsewhere.<sup>16</sup> In  
4  
5 106 unpublished data from our co-author (KS), since the start of pandemic in early April 2020, there  
6  
7  
8 107 has been an increase in both drug and alcohol use in Indonesia of up to 2.5%. Higher drug use  
9  
10 108 might be influenced by lockdown isolation, socio-economic issues due to unemployment, and  
11  
12 109 heavier mental burden.

13  
14  
15 110 The treatment gap for mental health care is evident in Indonesia, where only 0.5% of people  
16  
17 111 with SUD are connected with treatment and rehabilitative care.<sup>17</sup> Health providers and facilities  
18  
19 112 are severely lacking; in a nation of 267 million people, only 773 psychiatrists (0.32 per 100,000  
20  
21 113 people) are employed—second lowest in Southeast Asia<sup>18</sup>—across hospitals with psychiatric care,  
22  
23 114 half of which are located within the capital island of Java.<sup>19</sup> In terms of government-run primary  
24  
25 115 healthcare centres (abbreviated as *Puskesmas* in Indonesian), out of all *Puskesmas* (~1,700  
26  
27 116 nationwide), only a fifth actively provide mental health care.<sup>19,20</sup> Current treatment options for  
28  
29 117 SUD include one-on-one supportive psychotherapy, symptomatic pharmacotherapy, peer  
30  
31 118 counselling, and opioid substitution. Methadone maintenance therapy (MMT) is available in  
32  
33 119 *Puskesmas* since 2006, but coverage remains low: only 5% in a 2012 study<sup>21</sup> due to methadone  
34  
35 120 cost, reliance on subsidisation, lack of program sustainability,<sup>22</sup> and the tendency to incarcerate  
36  
37 121 patients under the 'war on drugs' policy.<sup>21,23</sup> Three-months retention rate of MMT was only 60-  
38  
39 122 74%.<sup>24,25</sup> Psychiatric comorbidities were also common in MMT users and quality of life was  
40  
41 123 evidently lower,<sup>26</sup> indicating the need for a more comprehensive mental health care approach.

42  
43  
44  
45 124 Behavioural therapies in many forms are commonly applied for SUD, most popular of  
46  
47 125 which is cognitive behavioural therapy (CBT). Strong evidence backs the efficacy of CBT for  
48  
49 126 SUD treatment. A meta-analysis gave a moderate overall effect size ( $d = 0.45$ ), with outcomes  
50  
51 127 ranging from the self-report abstinence, drug-free urine at treatment exit, to increased retention in  
52  
53  
54  
55  
56  
57  
58  
59  
60

1  
2  
3 128 therapy.<sup>27,28</sup> CBT strategies include: (a) contingency management (CM)<sup>29</sup> which introduces reward  
4  
5 129 for abstinence, (b) motivational interviewing (MI) which explores and resolves ambivalence,<sup>30</sup> (c)  
6  
7 130 relapse prevention (RP) which helps participants to identify high-risk triggers and prevent craving,  
8  
9  
10 131 or (d) combinations thereof.<sup>31</sup> Therapy could be delivered individually or in groups; the latter  
11  
12 132 evidently increased adherence and self-disclosure, as well as decreased the time needed by  
13  
14 133 providers to treat a participant by 40%.<sup>32,33</sup> CBT (particularly MI and RP) is relatively low-cost  
15  
16  
17 134 and can be delivered by non-specialists, making it beneficial in resource-limited settings.<sup>34,35</sup> In  
18  
19 135 regard to LMICs, while an ample amount of RCTs have supported CBT efficacy to reduce alcohol  
20  
21 136 use,<sup>36,37</sup> evidence for drug use disorders is limited. Only five RCTs have been published so far,<sup>38–</sup>  
22  
23  
24 137 <sup>42</sup> in which three of them were inpatient-based, even though SUD management mandates  
25  
26 138 sustainable outpatient care in community settings.

27  
28  
29 139 Telemedicine has the potential to elevate SUD treatment coverage in Indonesia. Internet  
30  
31 140 communication overcomes the geographical barriers of the Indonesian archipelago, and saves time  
32  
33 141 as well as transportation cost for both patients and providers, either in remote areas where health  
34  
35 142 services are thinly spread,<sup>43</sup> or major cities with heavy traffic such as Jakarta.<sup>44</sup> Privacy is better  
36  
37  
38 143 ensured; visiting clinics may disclose SUD diagnosis, which is one of the most stigmatised health  
39  
40 144 conditions.<sup>45</sup> Synchronous telemedicine via live video feed connects participants in real-time,  
41  
42  
43 145 improving rapport and potentially adherence, relative to asynchronous telemedicine (e.g., text  
44  
45 146 message or web application). Video-conferencing has been effectively used in SUD treatment,<sup>46–</sup>  
46  
47 147 <sup>51</sup> but recent systematic reviews<sup>52–57</sup> have revealed three lacking points: (1) previous reports merely  
48  
49 148 focused on alcohol and opioid use,<sup>46,49–51</sup> (2) group therapy was investigated by only one small-  
50  
51 149 scale pilot RCT,<sup>50</sup> and (3) no studies were done in LMICs. The use of internet devices has been  
52  
53  
54 150 rapidly expanding in LMICs, including Indonesia. Smartphone users accounted for 74% of the

1  
2  
3 151 Indonesian population in 2019, possibly reaching 89% by 2025.<sup>67</sup> Furthermore, the COVID-19  
4  
5 152 pandemic has elevated telemedicine from an accessory to a necessity, including for psychiatric  
6  
7  
8 153 care.<sup>68</sup> Its accessibility and acceptance among SUD patients, as shown in a recent survey,<sup>70</sup> may  
9  
10 154 potentially sustain telemedicine as the 'new normal' even in the post-pandemic world.<sup>69,71</sup>

11  
12  
13 155 Given the above challenges and opportunities, we propose a clinical trial to evaluate a  
14  
15 156 relapse prevention telemedicine program for SUD in Indonesia. We have developed a new  
16  
17 157 treatment module called *Indonesia Drug Addiction Relapse Prevention Program* (Indo-DARPP),  
18  
19  
20 158 which is a 12-week CBT-based group therapy. The primary objective is to evaluate the  
21  
22 159 effectiveness of Indo-DARPP delivered via video conference (tele-Indo-DARPP), added to  
23  
24 160 treatment as usual (TAU), to increase abstinence from primarily-used substances, compared to  
25  
26  
27 161 TAU only. Secondary objectives are to assess the effectiveness of the program toward changes in  
28  
29 162 quality of life, motivation to change, psychological symptoms, cognitive function, and coping  
30  
31 163 mechanisms. Retention, participant satisfaction, and group cohesion will be assessed as  
32  
33  
34 164 implementation outcomes, and cost-effectiveness analyses will be conducted to inform health  
35  
36 165 policy investment.

## 37 38 39 166 40 41 167 **METHODS**

### 42 43 44 168 **Trial design**

45  
46  
47 169 This trial is a parallel-group, two-arm, assessor-blinded, multicentre superiority  
48  
49 170 randomised controlled trial. The protocol adheres to the Standard Protocol Items:  
50  
51 171 Recommendations for Interventional Trials (SPIRIT) checklist (**Supplementary file 1**). We  
52  
53  
54 172 design the study as a pragmatic type 1 hybrid effectiveness-implementation trial,<sup>72</sup> which allows  
55  
56  
57  
58  
59

1  
2  
3 173 concurrent investigation of intervention effectiveness as well as implementation in clinical practice,  
4  
5 174 focusing on the former. After intake screening, participants will undergo baseline assessment (T1)  
6  
7  
8 175 and randomly allocated in a 1:1 ratio either to the intervention arm receiving tele-Indo-DARPP in  
9  
10 176 addition to TAU, or control arm receiving TAU only. Treatment will be done for 12 weeks,  
11  
12 177 followed by post-treatment assessment (T2) in week 13, and follow-up assessment (T3) in week  
13  
14 178 24 (**Figure 1**).

179

180 [Figure 1 approximately here.]

181

## 182 **Participants and settings**

183 Participants will be recruited from the community across Indonesia via social networks of  
184 eight sites: two primary health centres (Puskesmas), three referral hospitals, and three drug  
185 rehabilitation services (**Table 1**). These facility types constitute the community-based treatment  
186 model for SUD in Indonesia,<sup>73</sup> encompassing patients with various characteristics in motivation  
187 for behavioural change, substance use history, comorbidities, and current stage in treatment.  
188 Recruitment will be done via online advertisement (i.e., social networking services, group chat,  
189 website) and direct approach to current and former clients through outpatient services, in a  
190 consecutive sampling.

191 Puskesmas provides general primary care, pharmacotherapy for cases without any  
192 complications, and MMT. Referral hospitals provide psychotherapy, pharmacotherapy, opioid  
193 substitution therapy using buprenorphine/naloxone, and specialised care for cases with  
194 complications, such as severe psychiatric disorder. Rehabilitation services provide long-term

1  
2  
3 195 psychosocial care, typically in a mutual-aid group form. Selection of sites was based on feasibility,  
4  
5 196 client demographic, recruitment potential, and availability of providers. While recruited  
6  
7 197 participants may not be under treatment in the aforementioned sites at the time, facilitators for tele-  
8  
9  
10 198 Indo-DARPP will be the staffs of respective sites: general practitioners in Puskesmas, psychiatrists  
11  
12 199 in referral hospitals, and counsellors in rehabilitation centres.  
13  
14

15 200

16  
17  
18 201 [Table 1 approximately here.]  
19

20 202

21  
22  
23 203 Inclusion criteria will be those who: 1) aged 18-65 years old; 2) are diagnosed as having  
24  
25 204 substance use disorder based on DSM-5; 3) have used primarily-used substance for at least one  
26  
27 205 day in the past one year; 4) have access to electronic devices (i.e., smartphone, mobile tablet,  
28  
29 206 personal computer) with internet connection; and 5) are proficient in Indonesian. Exclusion criteria  
30  
31 207 will be those who: 1) have severe comorbidity that hinder informed consent or group therapy  
32  
33 208 participation; and 2) currently hospitalised or are using residential care.  
34  
35  
36  
37

38 209

## 39 210 **Recruitment**

40  
41  
42  
43 211 Patients eligibility will be assessed by collaborating staff at respective sites. For those who  
44  
45 212 have never been diagnosed as having SUD, addiction psychiatrists will conduct clinical  
46  
47 213 assessments via video call. Oral and written informed consent will be given to those eligible. For  
48  
49 214 urine tests, explanations will be given immediately after post-treatment (T2) assessment, as  
50  
51 215 anticipation for urine tests may influence substance use behaviour. Consent to urine test or absence  
52  
53 216 thereof will not affect study participation.  
54  
55  
56  
57  
58  
59  
60

217

**218 Randomisation and blinding**

219 Participants will be randomly allocated to either an intervention (tele-Indo-DARPP +  
220 TAU) or a control (TAU only) arm, with stratification by study site. Each site will conduct two  
221 waves of recruitment with 10 participants in each wave. After the first wave at each site, we will  
222 randomly allocate 5 participants to either intervention or control group. Recruitment will be  
223 continued until another 10 participants (second wave) joined, and random allocation will be done  
224 similarly. Allocation will be done using computer-generated random numbers by a researcher who  
225 will be blinded to participants' information, except for ID. Data will be collected by researchers  
226 who are blinded to the allocation arm of each participant.

227

**228 Development of Indo-DARPP**

229 Indo-DARPP was based on the Serigaya Methamphetamine Relapse Prevention Program  
230 (SMARPP), a face-to-face group CBT-based intervention in Japan developed by a co-author  
231 (TM),<sup>74</sup> which itself is based on the Matrix Model developed in the US.<sup>75</sup> Efficacy of SMARPP in  
232 increasing abstinence duration, motivation to change, and participation in self-help groups have  
233 been reported.<sup>76-78</sup> SMARPP has been widely implemented as a psychotherapy for SUD not only  
234 in psychiatric clinics but also primary healthcare, rehabilitation, and probation offices in Japan,  
235 covered by the national insurance scheme. SMARPP has excellent scalability via the use of a  
236 workbook, and can be delivered by non-specialists who have received a brief training.

237 Contents of Indo-DARPP are based on the RP model, where participants are guided to  
238 learn high-risk situations for substance use and coping strategies. The program also incorporates

1  
2  
3 239 elements of MI and psychoeducation on substances, SUD, and its common comorbidities. While  
4  
5 240 CM could also be added, it increases cost and may not be effective in the longer term,<sup>79</sup> and thus,  
6  
7  
8 241 MI and RP approaches will be utilised in this study. Adaptations from SMARPP were done via  
9  
10 242 focus group discussions involving Japanese researchers, Indonesia-based psychiatrists, general  
11  
12 243 practitioners, and peer counsellors, all of whom have extensive experience ranging 4-20 years in  
13  
14 244 the addiction field. Substances discussed in the module are amphetamine-type stimulants,  
15  
16 245 benzodiazepines and other prescribed medicines, opioids, marijuana, NPS, and alcohol. Indo-  
17  
18 246 DARPP is designed to be delivered in a small group format using workbook, and sessions will be  
19  
20 247 provided by one facilitator and one co-facilitator who is a peer counsellor with lived experiences  
21  
22 248 of SUD.  
23  
24  
25

26  
27 249 A pilot test was held at Site 1, recruiting nine SUD patients into a 12-week tele-Indo-  
28  
29 250 DARPP, to check the content acceptability and feasibility of the online delivery format. Further  
30  
31 251 adjustments were made based on the pilot results and patient feedback.  
32  
33

34 252

### 35 36 37 253 **Intervention via video conference: tele-Indo-DARPP**

38  
39  
40 254 Tele-Indo-DARPP will be implemented in group therapy with a maximum of five patients, in  
41  
42 255 a weekly 2-hour session for 12 weeks, delivered using the online video-conferencing application  
43  
44 256 Zoom. URLs for video conferences will be informed weekly by the research team to the private  
45  
46 257 Whatsapp group chat consisting of five Indo-DARPP participants plus two providers, which will  
47  
48 258 be created after randomisation. Each Indo-DARPP session consists of three parts: (1) "check-in",  
49  
50 259 where participants share history of substance use and craving in the past week, and analyse high-  
51  
52 260 risk situations and coping actions taken; (2) "today's topic", where providers guide discussion of  
53  
54 261 specific workbook chapters and participants fill in exercises, and (3) "check-out", where providers  
55  
56  
57  
58  
59  
60



262 give summary and invite feedback, and participants anticipate triggers and coping strategies for  
263 the following week.

264

### 265 **Providers of tele-Indo-DARPP**

266 At least two persons from each site will serve as facilitators, who meet the following criteria:  
267 psychiatrist with at least 1-year experience in treating SUD patients, or healthcare provider with  
268 at least 2-year experience in providing care for SUD patients, or peer counsellor with at least 2-  
269 year involvement in any organisation providing services for people with SUD. The roles of  
270 facilitators are to (1) lead and moderate Indo-DARPP sessions, (2) elaborate on chapter contents,  
271 (3) manage participants to follow rules, (4) establish safe and warm environment, (5) provide  
272 consultation including out-of-session, and (6) contact absent participants to encourage attendance.

273 Similarly, at least two persons from each site will serve as co-facilitators for the tele-Indo-  
274 DARPP, described as peer counsellors who have also experienced SUD and recovered, with at  
275 least 6-month involvement in any organisations providing services for people with SUD. The role  
276 of co-facilitator is to (1) share personal experiences relevant to discussion topics, (2) assist  
277 facilitators in ensuring a safe and warm environment, (3) provide general support to the Indo-  
278 DARPP process, and (4) provide counsel, including out-of-session.

279

### 280 **Training and supervision**

281 Prior to recruitment, all providers received a full-day training of trainers (TOT) online  
282 session on basic knowledge of SUD treatment, Indo-DARPP contents, video demonstration,  
283 hands-on role play, discussion on difficult cases, tele-Indo-DARPP, and study-related quality

1  
2  
3 284 control. Workbooks and manuals were handed to all providers, and close communication with the  
4  
5 285 research team will be kept via WhatsApp group chat throughout the research period. To maintain  
6  
7 286 treatment fidelity and quality control, during actual tele-Indo-DARPP sessions, addiction  
8  
9 287 psychiatrists from the research team (KS and EH) will randomly select and observe at least one  
10  
11 288 session at each site and review the providers using a structured checklist.  
12  
13  
14

15 289

### 18 290 **Control condition**

19  
20  
21 291 Participants who received treatment before the study will continue to receive treatment as  
22  
23 292 usual, regardless of group allocation. TAU was chosen as the control condition because the Indo-  
24  
25 293 DARPP is expected to complement the existing treatment services for SUD in every level of care.  
26  
27 294 TAU differs according to the service location (**Table 1**). Individual psychotherapy is typically  
28  
29 295 conducted via in-person short consultation (~15 minutes) with clinical psychiatrists.  
30  
31 296 Pharmacotherapy is given to alleviate symptoms, e.g., anxiolytics for anxiety. Patients undergoing  
32  
33 297 MMT visit the site almost every day to receive their daily doses, while patients undergoing  
34  
35 298 substitution therapy with buprenorphine with naloxone visit every week. All participants will be  
36  
37 299 able to continue any outpatient pharmacological treatment (e.g., MMT, antidepressants) and  
38  
39 300 psychotherapy (e.g., twelve-step group sessions).  
40  
41  
42  
43

44 301

### 47 302 **Primary outcome**

#### 50 303 **Abstinence from primarily used substance**

51  
52 304 The primary outcome is the percent days of abstinence from the primarily used substance during  
53  
54 305 the past 30 days. Percent days of abstinence has been shown to be sensitive to the effects of CBT  
55  
56  
57  
58  
59

1  
2  
3 306 and are good predictors of SUD treatment follow-up.<sup>80</sup> Use of primarily used substance each day  
4  
5 307 (yes/no) for 30 days will be retrospectively interviewed using the timeline followback (TLFB)  
6  
7 308 method (**Table 2**), which has good validity and high test-retest reliability in measuring substance  
8  
9 309 consumption.<sup>81,82</sup> The participants will be asked to recount every week, to reduce the risk of recall  
10  
11 310 bias. The primarily used substance is defined as the substance causing the most problems for  
12  
13 311 participants and drives them to seek care, at T1. For validation purposes, urine samples will be  
14  
15 312 collected at T2 to test the presence of the primarily used substance. Thresholds for a positive result  
16  
17 313 are >100 ng/ml for ethyl glucuronide (for alcohol use), >300 ng/ml for amphetamine-type  
18  
19 314 stimulant (i.e., d-methamphetamine and MDMA), >100 ng/ml for diacetyl morphine (heroin),  
20  
21 315 cocaine, and benzodiazepine, >50 ng/ml for synthetic cannabis (K2), and > 25 ng/ml for  
22  
23 316 tetrahydrocannabinol (marijuana).  
24  
25  
26  
27  
28  
29  
30

31 [Table 2 approximately here.]  
32

33 319

## 34 320 **Secondary outcomes**

### 35 321 *Addiction severity*

36  
37  
38 322 The Addiction Severity Index (ASI) is the most widely used measure in the field of  
39  
40 323 addiction.<sup>83</sup> Internal consistency, test-retest reliability, and scale independence of ASI to measure  
41  
42 324 substance use have long been established.<sup>84,85</sup> The Treatnet ASI version 3.0 by the United Nations  
43  
44 325 Office on Drugs and Crime (UNODC) will be used; the scale is available in Indonesian, and one  
45  
46 326 addiction treatment centre in Indonesia was included in its development trial.<sup>86</sup>  
47  
48  
49  
50

### 51 327 *Health-related quality of life*

52  
53  
54  
55  
56  
57  
58  
59  
60

1  
2  
3 328 The five-level version of the five-dimensional EuroQoL (EQ-5D)<sup>87,88</sup> will be used to assess  
4  
5 329 health-related quality of life (HRQoL), which has been done before among SUD patients with  
6  
7  
8 330 confirmed construct validity.<sup>90,91</sup> The total utility score will be obtained using the already  
9  
10 331 established value set in Indonesia.<sup>89</sup>

### 11 332 *Motivation to change*

12  
13  
14 333 Motivation to change will be assessed by the Action subscale the University of Rhode  
15  
16 334 Island Change Assessment (URICA).<sup>92</sup> URICA has been shown to have good validity, where  
17  
18  
19 335 higher scores indicate that the person has committed to develop positive behavioural changes  
20  
21 336 (Diclemente and County, 2000; Diclemente et al., 2004).<sup>93</sup>

### 22 337 *Coping strategies*

23  
24 338 Types of engaged stress coping will be assessed by the Brief Coping Orientations to  
25  
26 339 Problems Experienced (Brief COPE),<sup>94</sup> which is commonly used for SUD patients.<sup>95</sup> A higher  
27  
28  
29 340 score indicates that the person has adopted the coping type more frequently.

### 30 341 *Psychiatric symptoms*

31 342 Psychiatric symptoms will be evaluated by the Symptom Checklist 90-R (SCL-90-R).<sup>96</sup> The  
32  
33 343 Global Severity Index (GSI) will be used, which is feasible to measure psychiatric symptoms  
34  
35  
36 344 among SUD patients.<sup>97</sup>

### 37 345 *Cognitive function*

38 346 Cognitive function will be assessed by the Rey Auditory Verbal Learning Test (RAVLT),<sup>98</sup>  
39  
40 347 which is useful to diagnose cognitive impairment as well as post-treatment improvement in SUD  
41  
42  
43 348 patients.<sup>99,100</sup>

44 349

### 45 350 **Implementation outcomes**

1  
2  
3 351 ***Retention in treatment***  
4

5 352 Participants will be coded as ‘retained in treatment’ if they had therapeutic contacts—  
6  
7  
8 353 including attending tele-Indo-DARPP and visiting any outpatient clinic for TAU—in at least 75%  
9  
10 354 of the planned contacts during the past 3 months.

11  
12 355 ***Treatment satisfaction***  
13

14 356 Client Satisfaction Questionnaire-3 (CSQ-3)<sup>101</sup> is commonly used for treatment programs,  
15  
16  
17 357 including for SUD.<sup>102</sup>  
18

19 358 ***Group cohesion***  
20

21 359 Group Therapy Experience Scale (GTES) will be used to measure the level of group  
22  
23  
24 360 cohesion and self-disclosure in group therapy, as implementation outcomes of tele-Indo-  
25  
26 361 DARPP.<sup>103</sup>  
27

28 362 ***Indo-DARPP attendance***  
29

30  
31 363 Attendance to each session will be recorded by the facilitator.  
32

33 364 ***Cost effectiveness***  
34

35 365 Cost-effectiveness will be assessed from a patient, provider, and societal perspective. Cost  
36  
37  
38 366 data will be calculated by multiplying the quantity of utilised resources by unit price. Data on  
39  
40 367 quantity and unit price will be obtained from within the trial, or estimated from relevant data  
41  
42 368 sources. For effectiveness data, both clinical and economic indexes will be used. The clinical index  
43  
44  
45 369 is abstinence from primarily used substance in the past 30 days, which will be converted into  
46  
47 370 abstinent year. The economic index is quality-adjusted life year (QALY) calculated from the utility  
48  
49 371 score of EQ-5D.  
50

51 372 ***Feedback interviews***  
52  
53  
54  
55  
56  
57  
58  
59  
60

1  
2  
3 373           Semi-structured interviews will be done with both participants and providers to assess the  
4  
5 374 following: satisfaction with content quality, comprehensibility, technical experience regarding  
6  
7 375 video-conferencing, comfortableness, module practicability, and participants' perception on the  
8  
9 376 credibility of providers. Interviews will be audio-recorded under the interviewees' consent.  
10  
11

12 377

### 14 378 **Participant characteristics**

16  
17 379           The following data will be obtained via a self-administered questionnaire: age, gender,  
18  
19 380 approximate residential location, marital status, household co-habitants, ethnicity, religion, highest  
20  
21 381 education level, employment status, individual and household income, type of internet device used,  
22  
23 382 frequency of video calls in the past year, age of first drug use, primarily used substance, inpatient  
24  
25 383 history or incarceration in the past month, type of treatments received, treatment locations in the  
26  
27 384 past three months, status of current outpatient care (voluntary or involuntary, legal or non-legal),  
28  
29 385 and transportation time and cost from own residence to the outpatient location.  
30  
31

32 386

### 34 387 **Data collection procedure**

36  
37  
38 388           Researchers blinded to the treatment allocation will collect data at three different time  
39  
40 389 points: at baseline (week 0, T1), the week after the completion of treatment (week 13, T2), and  
41  
42 390 three months after the completion of treatment (week 24, T3) using self-answered questionnaire  
43  
44 391 and one-on-one interview. As for the primary outcome, the participants will be asked to recall  
45  
46 392 weekly using the TLFB, and thus, an assessment period of approximately 4 weeks will be added  
47  
48 393 after each assessment time point. Urine specimens will be collected only at T2, at the final 2 weeks  
49  
50 394 within the TLFB assessment period. Assessment schedule is shown in **Table 2** and **Figure 2**.  
51  
52

53 395

1  
2  
3 396 [Figure 2 approximately here.]  
4  
5

6 397

7  
8  
9 398 **Sample size**

10  
11 399 Sample size was calculated for the primary outcome to detect a medium effect size of  $d =$   
12  
13 400 0.59, which is based on a previous study examining the efficacy of telemedicine for people with  
14  
15 401 SUD in an LIMC.<sup>65</sup> Using  $\alpha = 0.05$  and power = 0.80, a simple t-test requires  $n = 46$  per arm. We  
16  
17 402 estimated the design effect of clustering within Indo-DARPP group, using the formula,  $D = 1 +$   
18  
19 403  $(m - 1) \rho$ ,<sup>104</sup> assuming intraclass correlation within Indo-DARPP groups or  $\rho = 0.05$ , and group  
20  
21 404 size or  $m = 5$ , which yielded the design effect or  $D = 1.2$ . Multiplying the result of simple  
22  
23 405 calculation by the design effect, the minimal number of participants in data analysis was 56 per  
24  
25 406 arm. Assuming attrition proportion = 26%,<sup>105</sup> the sample size for enrolment was set as 76 per arm,  
26  
27 407 or 152 in total. We will recruit 10 participants for each wave at a site, thus the number was rounded  
28  
29 408 up to 160 participants.  
30  
31  
32  
33  
34

35 409

36  
37  
38 410 **Statistical analysis**

39  
40 411 A detailed statistical analysis plan will be developed by a statistician who is blinded to  
41  
42 412 patients' allocation, prior to data analysis. Baseline data description and main analyses will be  
43  
44 413 conducted on an intention-to-treat basis, i.e., participants' data will be handled according to their  
45  
46 414 initially assigned arms, regardless of actual received treatment. Analyses will be conducted with a  
47  
48 415 significance level of 5% in the two-sided test, using Stata/SE 16.1.  
49  
50  
51

52  
53 416 ***Consideration for correlated outcome data***  
54  
55  
56  
57  
58  
59  
60

1  
2  
3 417 Correlation within sites for a control arm will be ignored, as the TAU within one site varies  
4  
5 418 per patient and some participants may not receive any treatment. For an intervention arm,  
6  
7 419 correlation within each Indo-DARPP group due to the nature of group therapy should be accounted  
8  
9 420 for. We will define a new variable termed ‘clustering group identification (CID)’, where the control  
10  
11 421 arm will be coded as a unique CID for each person, while the intervention arm will be coded based  
12  
13 422 on the tele-Indo-DARPP group they were in, i.e., the same CID for five participants.  
14

### 17 423 *Main analysis*

19  
20 424 Primary endpoint will be set at T2. The mean of the outcome changes from T1 to T2 will  
21  
22 425 be compared between the intervention and control arms using a linear model. To investigate the  
23  
24 426 durability of the treatment effect, outcome changes from T1 to T3 will also be compared between  
25  
26 427 both arms. We will account for the aforementioned correlations by clustering data, based on CID  
27  
28 428 in the generalised estimation equations (GEE). To help interpret effect size, Cohen’s *d* between  
29  
30 429 arms will be calculated.  
31  
32

### 34 430 *Missing values*

35  
36  
37 431 A complete case analysis will be done, which will only include participants with no  
38  
39 432 missing values in the variables of interest. Sensitivity analysis for missing values will be conducted  
40  
41 433 by either inverse probability weighted GEE<sup>106</sup> or multiple imputation.  
42  
43  
44

### 45 434 *Subgroup analysis*

46  
47 435 The effect of intervention will be investigated by subgroups, as the observed effect may  
48  
49 436 vary depending on specific population. The participants will be divided by the types of primarily  
50  
51 437 used substance, gender, previous and current utilisation of other SUD treatment, high and low  
52  
53  
54  
55  
56  
57  
58  
59



1  
2  
3 438 values in clinical characteristics at T1, e.g., percent days of abstinence, ASI drug use composite  
4  
5 439 score, URICA readiness score, and cognitive function.  
6

#### 7 440 ***Implementation evaluation***

9  
10 441 Chi-squared tests and *t*-tests will be done to compare retention in treatment and treatment  
11  
12 442 satisfaction between the arms, exclusively for participants who were already receiving SUD  
13  
14 443 treatment at T1. Group cohesion and Indo-DARPP attendance will be descriptively reported by  
15  
16 444 mean and standard deviation. For cost-effectiveness analysis, the incremental cost-effectiveness  
17  
18 445 ratios (ICERs) will be calculated, which will yield costs per QALY and abstinent year. Feedback  
19  
20 446 interviews will be transcribed and thematic analysis will be conducted.  
21  
22  
23

24 447

#### 26 448 **Compensations**

28  
29 449 Participants in both the control and intervention groups will receive 300,000 IDR ( $\approx$  21.3  
30  
31 450 USD) to compensate for their transportation to treatment sites for TAU throughout the 12 weeks,  
32  
33 451 and also 98,000 IDR ( $\approx$  7.0 USD) for every time they complete an online video assessment as  
34  
35 452 compensation for internet data and 2-hour data collection. Specific to the intervention group,  
36  
37 453 participants will receive internet mobile data equivalent to 50,000 IDR ( $\approx$  3.5 USD) before the first  
38  
39 454 session of tele-Indo-DARPP, and receive the same amount of mobile data every time they attended  
40  
41 455 four sessions of tele-Indo-DARPP. As all monetary amounts were set at the approximate cost, the  
42  
43 456 amounts are intended purely for compensation and not as reward, as in contingency management.  
44  
45 457 For providers, compensation amounted to 170,000 IDR ( $\approx$  12.1 USD) and 150,000 IDR ( $\approx$  10.7  
46  
47 458 USD) will be given for each tele-Indo-DARPP session to facilitator and co-facilitator, respectively.  
48  
49  
50  
51

52 459

#### 54 460 **Data monitoring**

1  
2  
3 461 Data on adverse events including hospitalisation, arrest, and death will be collected from the  
4  
5 462 participants' treating psychiatrist or medical staff. In addition, participants will be interviewed at  
6  
7 463 T2 on whether they experience any subjective harmful effect (e.g., withdrawal syndrome,  
8  
9 464 increased cravings) after joining Indo-DARPP. An independent data monitoring committee will  
10  
11 465 not be convened, as the study involves short-term non-invasive psychotherapeutic intervention.  
12  
13 466 No interim analysis is planned due to the short duration of intervention. Completeness and  
14  
15 467 accuracy of data collection will be checked by Japanese co-investigators, and there will be no  
16  
17 468 auditing process by independent investigators.  
18  
19  
20  
21  
22  
23

#### 24 470 **Data publication**

25  
26 471 Deidentified results of the study will be published in scientific publication, and reported to  
27  
28 472 relevant government body in Indonesia to advocate adoption of the treatment module.  
29  
30  
31  
32

#### 33 474 **Ethical consideration**

34  
35  
36 475 This study protocol (version 2.0, May 2020) was approved by the Research Ethical  
37  
38 476 Committee of Faculty of Medicine, Universitas Indonesia (approval number: KET-1175/2019),  
39  
40 477 the Ethics Committee of Graduate School and Faculty of Medicine, Kyoto University (approval  
41  
42 478 number: C1483). The study protocol was registered at the University Hospital Medical Information  
43  
44 479 Network clinical trial registry (UMIN-CTR) (registry number: UMIN000042186).  
45  
46  
47

48 480 Consent process will be conducted carefully to ensure that all potential participants fully  
49  
50 481 understand research objectives, procedures, risks, benefits, costs, and alternatives. It will be  
51  
52 482 emphasised that study participation is voluntary and consent can be withdrawn at any time before  
53  
54 483 research publication. We will allocate participants to treatment arms only when written informed  
55  
56  
57  
58  
59  
60

1  
2  
3 484 consents for participation are obtained. Likewise, urine specimens will only be collected if written  
4  
5 485 informed consents for urine collection are obtained. Participants will not receive any adverse  
6  
7 486 influence in deciding study participation and/or urine collection. Personal data will be protected  
8  
9  
10 487 by separating study data from participants' identifiable information. To quickly respond to adverse  
11  
12 488 events arising when outpatient visits are not possible, a dedicated phone number and a WhatsApp  
13  
14 489 account for the study will be opened to ease communication to the research team. Participants will  
15  
16  
17 490 be instructed to text or call when experiencing any adverse events. Importantly, written agreement  
18  
19 491 will be obtained from participants to never share others' information to any third party. This  
20  
21 492 regulation will be enforced in both during and outside tele-Indo-DARPP sessions, in any medium,  
22  
23 493 including video conference and group chat.  
24  
25  
26  
27 494  
28

## 29 495 **Discussion**

30  
31  
32 496 Up until the time of writing, nine RCTs from LMICs have reported the effectiveness of digital  
33  
34 497 delivery of interventions for SUD. Utilised formats were telephone calls,<sup>58-61</sup> webpages,<sup>62-64</sup> and  
35  
36 498 mobile applications,<sup>65,66</sup> however, and no study in LMICs has so far investigated the effectiveness  
37  
38 499 of video-conference-based psychotherapy. The latter may facilitate honest, interactive discussions  
39  
40 500 on personal substance use and cravings, founded on better rapport between providers and  
41  
42 501 patients,<sup>107</sup> all of which is integral for CBT for SUD. One meta-analysis concluded that web-based  
43  
44 502 mental health interventions had better retention rate and treatment outcomes when therapists were  
45  
46 503 synchronously involved.<sup>108</sup>  
47  
48  
49  
50

51 504 The proposed study has several strengths. This is the first RCT to investigate the  
52  
53 505 effectiveness of video-conference based psychotherapy in any LMIC, as well as the first study to  
54  
55 506 establish quality evidence on psychotherapy for SUD in Indonesia. Recruitment will be done  
56  
57  
58  
59  
60

1  
2  
3 507 throughout multiple levels of care, i.e., tertiary (referral hospitals), primary (Puskesmas) and  
4  
5 508 community (rehabilitation centres). The latter have extensive reach encompassing all major  
6  
7 509 Indonesian islands, and advertising will be done via online social media, facilitating recruitment  
8  
9  
10 510 from across the nation. While CBT effectiveness is the primary outcome, the study allows  
11  
12 511 elucidation of real-world implementation and cost-effectiveness in a hybrid effectiveness-  
13  
14 512 implementation design.<sup>72</sup> This is particularly true in Puskesmas, where the providers will be  
15  
16 513 general practitioners, and in rehabilitation centres, where the providers will be peer counsellors.  
17  
18 514 This pragmatic RCT aims to mimic the usual clinical practice, and we hope that the result may be  
19  
20  
21 515 used to inform decision-making by patients, providers, and policymakers.<sup>109</sup>  
22  
23

24 516 Several limitations can also be presumed. While urine drug tests will be done for objective  
25  
26 517 validation, all data from participants will be self-reported and prone to recall and social desirability  
27  
28 518 bias. As the study will include people who use various substances, in multiple sites where TAU  
29  
30 519 differs, and possibly people who are not receiving any treatment, the control condition will be  
31  
32  
33 520 heterogeneous. Variability in the providers' background may create inconsistency in CBT delivery,  
34  
35 521 even though TOT and treatment manuals were introduced as an effort to standardise care.  
36  
37 522 Treatment delivery via online video-conferencing might have poor generalizability toward people  
38  
39 523 with low internet literacy, as well as people in low socio-economic strata who could not afford  
40  
41 524 smartphones—although entry-level Android-based smartphones (less than ~80 USD) are available  
42  
43 525 nationwide in Indonesia.  
44  
45  
46  
47

48 526 Efforts to establish evidence-based treatment for SUD should be scaled up in Indonesia  
49  
50 527 and LMICs in general, where effectiveness data is sparse. The proposed study may present high-  
51  
52 528 quality evidence, and a successful outcome may birth a new SUD treatment module in Indonesia,  
53  
54 529 paving way for the adoption of Indo-DARPP into the national guideline. We hope that our efforts  
55  
56  
57  
58  
59  
60

1  
2  
3 530 may further promote a comprehensive, healthcare-centric approach—as opposed to repressive  
4  
5 531 anti-drug policies—to tackle the substance use epidemic in the country.  
6  
7

8 532  
9

### 10 533 **Figure legends**

11  
12 534 **Figure 1.** Study flowchart for each site. A total of 20 participants will be recruited through the  
13  
14  
15 535 social network of each site. After 10 participants have been recruited in the first wave,  
16  
17 536 randomisation will be done to allocate participants into two groups: intervention (Indo-DARPP +  
18  
19 537 TAU) and control (TAU only), with 5 participants in each group. Recruitment will be continued  
20  
21 538 until another 10 participants (second wave) joined before randomisation and allocation, similar as  
22  
23  
24 539 before. Treatment period will be 12 weeks. Assessments will be done 3 times: T1 (Week 0) during  
25  
26 540 baseline or before randomisation, T2 (Week 13-16) during post-assessment or 1-4 weeks after  
27  
28 541 treatment period ends, and T3 (Week 24) during 3 months after treatment ends.  
29  
30

31 542  
32

33 543 **Figure 2.** Planned trial schedule across all 8 research sites. Staggered schedules were designed to  
34  
35 544 spread the workload of providers in regard to Indo-DARPP intervention, as well as research staff  
36  
37 545 in regard to assessments. After training of providers, all sites were given approximately 1-2 months  
38  
39 546 to recruit at least 20 participants. Sites with relatively higher potential to recruit faster, i.e., those  
40  
41 547 with higher rate of patient turnover, were selected ahead in the schedule. Each site will have 2  
42  
43 548 waves of recruitment and treatment period.  
44  
45  
46

47 549  
48

### 49 550 **Acknowledgement**

50  
51  
52 551 We would like to thank Dr. Takashi Kawamura for his valuable comments on the study design.  
53  
54  
55

56 552  
57  
58  
59  
60

### 553 **Author contributions**

554 CY, KS, and YO conceptualised the study. CY, KS, EH, and YO are the main developers of the  
555 Indo-DARPP module, designed study methodology, invited and coordinated site investigators,  
556 conducted training of providers, wrote the protocol, reviewed and edited the final manuscript. EB,  
557 VR, PA, and AP helped in module development, study design, training of providers, and sites  
558 coordination. TS provided biostatistical and epidemiological supervision. TM provided the  
559 original SMARPP module and clinical input and perspectives to improve study quality. RS  
560 supervised the study and procured grant. CY and RS are the principal investigators of the grants.  
561 All authors have read and approved the final manuscript.

562

### 563 **Funding**

564 This work was supported by the Japan-ASEAN Platform for Transdisciplinary Studies project of  
565 the Center for Southeast Asian Studies of Kyoto University, Research Unit for Development of  
566 Global Sustainability of Kyoto University, and Japan Society for the Promotion of Science (JSPS)  
567 Grants-in-Aid for Scientific Research (KAKENHI) (Grant number JP19K24256).

568

### 569 **Competing interests**

570 The authors declare no competing interest.

571

### 572 **Patient and public involvement**

573 Patients' feedback during the pilot study was incorporated into the Indo-DARPP module design.  
574 Apart from that, patients and/or the public were not involved in the conduct, reporting, or  
575 dissemination plans of this study.

1  
2  
3 5764  
5 **577 Patient consent for publication**6  
7  
8 578 Not required.9  
10 57911  
12 **580 Ethics approval and trial registration**

13  
14 581 This study protocol was approved by the Research Ethical Committee of Faculty of Medicine,  
15 582 Universitas Indonesia (approval number: KET-1175/2019), and the Ethics Committee of Graduate  
16  
17 583 School and Faculty of Medicine, Kyoto University (approval number: C1483). The study protocol  
18  
19 584 was registered at the University Hospital Medical Information Network clinical trial registry  
20  
21  
22  
23 585 (UMIN-CTR) (registry number: UMIN000042186).

24  
25  
26 58627  
28  
29 **587 Availability of data and materials**

30  
31 588 The full protocol and datasets of the planned study will be available from the corresponding author  
32  
33 589 on reasonable request.

34  
35  
36 59037  
38 **591 References**

- 39  
40  
41 592 1. GBD 2016 Alcohol and Drug Use Collaborators. The global burden of disease attributable to alcohol  
42  
43 593 and drug use in 195 countries and territories, 1990-2016: a systematic analysis for the Global Burden  
44  
45 594 of Disease Study 2016. *Lancet Psychiatry* **5**, 987–1012 (2018).
- 46  
47 595 2. Murray, C. J. L. *et al.* Global burden of 87 risk factors in 204 countries and territories, 1990–2019: a  
48  
49 596 systematic analysis for the Global Burden of Disease Study 2019. *Lancet* **396**, 1223–1249 (2020).
- 50  
51 597 3. Peacock, A. *et al.* Global statistics on alcohol, tobacco and illicit drug use: 2017 status report.  
52  
53 598 *Addiction* **113**, 1905–1926 (2018).

- 1  
2  
3 599 4. United Nations Office on Drugs and Crimes. *World Drug Report 2020*. 1–30 (UNODC, 2020).  
4  
5 600 5. Connery, H. S., McHugh, R. K., Reilly, M., Shin, S. & Greenfield, S. F. Substance use disorders in  
6  
7 601 global mental health delivery: epidemiology, treatment gap, and implementation of evidence-based  
8  
9 602 treatments. *Harv. Rev. Psychiatry* **28**, 316–327 (2020).  
10  
11 603 6. Lora, A., Hanna, F. & Chisholm, D. Mental health service availability and delivery at the global  
12  
13 604 level: an analysis by countries' income level from WHO's Mental Health Atlas 2014. *Epidemiol.*  
14  
15 605 *Psychiatr. Sci.* 1–12 (2017).  
16  
17 606 7. Rawson, R. A., Woody, G., Kresina, T. F. & Gust, S. The globalisation of addiction research:  
18  
19 607 capacity-building mechanisms and selected examples. *Harv. Rev. Psychiatry* **23**, 147–156 (2015).  
20  
21 608 8. Degenhardt, L. *et al.* Estimating treatment coverage for people with substance use disorders: an  
22  
23 609 analysis of data from the World Mental Health Surveys. *World Psychiatry* **16**, 299–307 (2017).  
24  
25 610 9. Puslitdatin Badan Narkotika Nasional. *Indonesia drugs report 2019*. (2019).  
26  
27 611 10. Puslitdatin Badan Narkotika Nasional. *Survei penyalahgunaan dan peredaran gelap narkoba tahun*  
28  
29 612 *2018 [Survey of illicit drug abuse and black marketing in 2018]*.  
30  
31 613 [https://perpustakaan.bnn.go.id/sites/default/files/Buku\\_Digital\\_2020-](https://perpustakaan.bnn.go.id/sites/default/files/Buku_Digital_2020-10/Survei%20Penyalahgunaan%20Dan%20Peredaran%20Gelap%20Narkoba%20Tahun%202018%20%28%20BNN%20-%20LIPI%29.pdf)  
32  
33 614 [10/Survei%20Penyalahgunaan%20Dan%20Peredaran%20Gelap%20Narkoba%20Tahun%202018%](https://perpustakaan.bnn.go.id/sites/default/files/Buku_Digital_2020-10/Survei%20Penyalahgunaan%20Dan%20Peredaran%20Gelap%20Narkoba%20Tahun%202018%20%28%20BNN%20-%20LIPI%29.pdf)  
34  
35 615 [20%28%20BNN%20-%20LIPI%29.pdf](https://perpustakaan.bnn.go.id/sites/default/files/Buku_Digital_2020-10/Survei%20Penyalahgunaan%20Dan%20Peredaran%20Gelap%20Narkoba%20Tahun%202018%20%28%20BNN%20-%20LIPI%29.pdf) (2019).  
36  
37 616 11. Lynch, C. Indonesia's use of capital punishment for drug-trafficking crimes: legal obligations,  
38  
39 617 extralegal factors, and the Bali Nine Case. *Colum. Hum. Rts. L. Rev.* **40**, 523 (2008).  
40  
41 618 12. Puslitdatin Badan Narkotika Nasional. *Ringkasan eksekutif hasil survei BNN tahun 2016 [Executive*  
42  
43 619 *summary of survey result by BNN in 2016]*. [https://www.issup.net/files/2017-](https://www.issup.net/files/2017-10/penelitian%20prevelansi%20UI%20dan%20BNN.pdf)  
44  
45 620 [10/penelitian%20prevelansi%20UI%20dan%20BNN.pdf](https://www.issup.net/files/2017-10/penelitian%20prevelansi%20UI%20dan%20BNN.pdf) (2017).  
46  
47 621 13. Al-Ansari, B., Thow, A.-M., Day, C. A. & Conigrave, K. M. Extent of alcohol prohibition in civil  
48  
49 622 policy in Muslim majority countries: the impact of globalisation. *Addiction* **111**, 1703–1713 (2016).  
50  
51 623 14. World Health Organization. *Global Status Report on Alcohol and Health 2018*. (World Health  
52  
53 624 Organization, 2019).



- 1  
2  
3 625 15. Media Indonesia. Banyak narkoba jenis baru masuk ke Indonesia [A lot of new types of illicit drugs  
4 626 has entered Indonesia]. *Media Indonesia* [https://mediaindonesia.com/politik-dan-  
6 628 hukum/325442/banyak-narkoba-jenis-baru-masuk-ke-indonesia](https://mediaindonesia.com/politik-dan-<br/>5 627 hukum/325442/banyak-narkoba-jenis-baru-masuk-ke-indonesia) (2020).
- 7  
8  
9 628 16. Kosten, T. R. & Petrakis, I. L. The hidden epidemic of opioid overdoses during the Coronavirus  
10 629 Disease 2019 pandemic. *JAMA Psychiatry* (2020) doi:10.1001/jamapsychiatry.2020.4148.
- 11  
12  
13 630 17. Pusat Data dan Informasi Kementerian Kesehatan Republik Indonesia. *Gambaran umum  
14 631 penyalahgunaan narkoba di Indonesia*. (2014).
- 15  
16  
17 632 18. Kementerian Kesehatan Republik Indonesia. *Aplikasi komunikasi data [Data communication  
18 633 application]*. <https://komdat.kemkes.go.id/lama/index.php> (2020).
- 19  
20  
21 634 19. Idaiani, S. & Riyadi, E. I. Sistem kesehatan jiwa di indonesia: tantangan untuk memenuhi kebutuhan  
22 635 [Indonesian mental health system: the challenge to fulfil needs]. *Jurnal Penelitian dan  
23 636 Pengembangan Pelayanan Kesehatan* 70–80 (2018).
- 24  
25  
26 637 20. Marastuti, A. *et al.* Development and evaluation of a mental health training program for community  
27 638 health workers in indonesia. *Community Ment. Health J.* **56**, 1248–1254 (2020).
- 28  
29  
30 639 21. Wammes, J. J. G. *et al.* Cost-effectiveness of methadone maintenance therapy as HIV prevention in  
31 640 an Indonesian high-prevalence setting: a mathematical modelling study. *Int. J. Drug Policy* **23**, 358–  
32 641 364 (2012).
- 33  
34  
35 642 22. Afriandi, I. *et al.* Costs of hospital-based methadone maintenance treatment in HIV/AIDS control  
36 643 among injecting drug users in Indonesia. *Health Policy* **95**, 69–73 (2010).
- 37  
38  
39 644 23. Sharma, M., Oppenheimer, E., Saidel, T., Loo, V. & Garg, R. A situation update on HIV epidemics  
40 645 among people who inject drugs and national responses in South-East Asia Region. *AIDS* **23**, 1405–  
41 646 1413 (2009).
- 42  
43  
44 647 24. Sarasvita, R., Tonkin, A., Utomo, B. & Ali, R. Predictive factors for treatment retention in  
45 648 methadone programs in Indonesia. *J. Subst. Abuse Treat.* **42**, 239–246 (2012).
- 46  
47  
48 649 25. Rumah Sakit Ketergantungan Obat. *Laporan Kegiatan Tahunan (Annual Report) 2007*. (2008).
- 49  
50  
51 650 26. Iskandar, S. *et al.* Severity of psychiatric and physical problems is associated with lower quality of

- 1  
2  
3 651 life in methadone patients in Indonesia. *Am. J. Addict.* **22**, 425–431 (2013).  
4  
5 652 27. McHugh, R. K., Hearon, B. A. & Otto, M. W. Cognitive behavioral therapy for substance use  
6  
7 653 disorders. *Psychiatr. Clin. North Am.* **33**, 511–525 (2010).  
8  
9 654 28. Magill, M. & Ray, L. A. Cognitive-behavioral treatment with adult alcohol and illicit drug users: a  
10  
11 655 meta-analysis of randomised controlled trials. *J. Stud. Alcohol Drugs* **70**, 516–527 (2009).  
12  
13 656 29. Bigelow, G. E. & Silverman, K. Theoretical and empirical foundations of contingency management  
14  
15 657 treatments for drug abuse. (1999).  
16  
17 658 30. Miller, W. R. & Rollnick, S. Motivational interviewing: preparing people for change. Book review.  
18  
19 659 *J. Stud. Alcohol* **63**, 776–777 (2002).  
20  
21 660 31. Washton, A. M. Relapse prevention: maintenance strategies in the treatment of addictive behaviors.  
22  
23 661 *J. Stud. Alcohol* **47**, 260–261 (1986).  
24  
25 662 32. Sobell, L. C., Sobell, M. B. & Agrawal, S. Randomized controlled trial of a cognitive-behavioral  
26  
27 663 motivational intervention in a group versus individual format for substance use disorders. *Psychol.*  
28  
29 664 *Addict. Behav.* **23**, 672–683 (2009).  
30  
31 665 33. Sobell, L. C. & Sobell, M. B. *Group Therapy for Substance Use Disorders: A Motivational*  
32  
33 666 *Cognitive-behavioral Approach*. (Guilford Press, 2011).  
34  
35 667 34. Myers, B. 11 - Psychotherapy for substance use disorders. in *Global Mental Health and*  
36  
37 668 *Psychotherapy* (eds. Stein, D. J., Bass, J. K. & Hofmann, S. G.) 241–256 (Academic Press, 2019).  
38  
39 669 35. Heijdra Suasnabar, J. M. & Hipple Walters, B. Community-based psychosocial substance use  
40  
41 670 disorder interventions in low-and-middle-income countries: a narrative literature review. *Int. J.*  
42  
43 671 *Ment. Health Syst.* **14**, 74 (2020).  
44  
45 672 36. Joseph, J. & Basu, D. Efficacy of Brief Interventions in Reducing Hazardous or Harmful Alcohol  
46  
47 673 Use in Middle-Income Countries: Systematic Review of Randomized Controlled Trials. *Alcohol*  
48  
49 674 *Alcohol* **52**, 56–64 (2017).  
50  
51 675 37. Preusse, M., Neuner, F. & Ertl, V. Effectiveness of Psychosocial Interventions Targeting Hazardous  
52  
53 676 and Harmful Alcohol Use and Alcohol-Related Symptoms in Low- and Middle-Income Countries: A  
54  
55  
56  
57  
58  
59  
60

- 1  
2  
3 677 Systematic Review. *Front. Psychiatry* **11**, 768 (2020).  
4  
5 678 38. Ögel, K. & Coskun, S. Cognitive behavioral therapy-based brief intervention for volatile substance  
6  
7 679 misusers during adolescence: a follow-up study. *Subst. Use Misuse* **46 Suppl 1**, 128–133 (2011).  
8  
9 680 39. Min, Z. *et al.* A pilot assessment of relapse prevention for heroin addicts in a Chinese rehabilitation  
10  
11 681 center. *Am. J. Drug Alcohol Abuse* **37**, 141–147 (2011).  
12  
13 682 40. Wechsberg, W. M. *et al.* Double jeopardy--drug and sex risks among Russian women who inject  
14  
15 683 drugs: initial feasibility and efficacy results of a small randomised controlled trial. *Subst. Abuse*  
16  
17 684 *Treat. Prev. Policy* **7**, 1 (2012).  
18  
19 685 41. Pan, S. *et al.* Efficacy of Cognitive Behavioral Therapy on Opiate Use and Retention in Methadone  
20  
21 686 Maintenance Treatment in China: A Randomised Trial. *PLoS One* **10**, e0127598 (2015).  
22  
23 687 42. Alammehrjerdi, Z., Briggs, N. E., Biglarian, A., Mokri, A. & Dolan, K. A Randomized Controlled  
24  
25 688 Trial of Brief Cognitive Behavioral Therapy for Regular Methamphetamine Use in Methadone  
26  
27 689 Treatment. *Journal of Psychoactive Drugs* vol. 51 280–289 (2019).  
28  
29 690 43. Pols, H. The future of mental health care in Indonesia. *Inside Indonesia*  
30  
31 691 <https://www.insideindonesia.org/the-future-of-mental-health-care-in-indonesia> (2020).  
32  
33 692 44. Rahman, D. F. Traffic jam: Jakarta roads remain one of world's most congested. *The Jakarta Post*  
34  
35 693 [https://www.thejakartapost.com/news/2020/02/06/traffic-jam-jakarta-roads-remain-one-of-worlds-](https://www.thejakartapost.com/news/2020/02/06/traffic-jam-jakarta-roads-remain-one-of-worlds-most-congested.html)  
36  
37 694 [most-congested.html](https://www.thejakartapost.com/news/2020/02/06/traffic-jam-jakarta-roads-remain-one-of-worlds-most-congested.html) (2020).  
38  
39 695 45. Mannarini, S. & Boffo, M. Anxiety, bulimia, drug and alcohol addiction, depression, and  
40  
41 696 schizophrenia: what do you think about their aetiology, dangerousness, social distance, and  
42  
43 697 treatment? A latent class analysis approach. *Soc. Psychiatry Psychiatr. Epidemiol.* **50**, 27–37 (2015).  
44  
45 698 46. Staton-Tindall, M., Havens, J. R., Webster, J. M. & Leukefeld, C. METelemedicine: a pilot study  
46  
47 699 with rural alcohol users on community supervision: A pilot study with rural alcohol users. *J. Rural*  
48  
49 700 *Health* **30**, 422–432 (2014).  
50  
51 701 47. Baca, C. T. & Manuel, J. K. Satisfaction with long-distance motivational interviewing for problem  
52  
53 702 drinking. *Addict. Disord. Their Treat.* **6**, 39 (2007).  
54  
55  
56  
57  
58  
59  
60

- 1  
2  
3 703 48. De Leo, J. A., Lamb, K., LaRowe, S. & Santa Ana, E. J. A brief behavioral telehealth intervention  
4  
5 704 for veterans with alcohol misuse problems in VA primary care. *Drug Alcohol Depend.* **140**, e45  
6  
7 705 (2014).  
8  
9 706 49. Tarp, K., Bojesen, A. B., Mejldal, A. & Nielsen, A. S. Effectiveness of optional videoconferencing-  
10  
11 707 based treatment of alcohol use disorders: randomised controlled trial. *JMIR Ment Health* **4**, e38  
12  
13 708 (2017).  
14  
15 709 50. King, V. L. *et al.* Assessing the effectiveness of an Internet-based videoconferencing platform for  
16  
17 710 delivering intensified substance abuse counseling. *J. Subst. Abuse Treat.* **36**, 331–338 (2009).  
18  
19 711 51. King, V. L., Brooner, R. K., Peirce, J. M., Kolodner, K. & Kidorf, M. S. A randomised trial of Web-  
20  
21 712 based videoconferencing for substance abuse counseling. *J. Subst. Abuse Treat.* **46**, 36–42 (2014).  
22  
23 713 52. Boumparis, N., Schulte, M. H. J. & Riper, H. Digital mental health for alcohol and substance use  
24  
25 714 disorders. *Current Treatment Options in Psychiatry* **6**, 352–366 (2019).  
26  
27 715 53. Naslund, J. A. *et al.* Digital technology for treating and preventing mental disorders in low-income  
28  
29 716 and middle-income countries: a narrative review of the literature. *Lancet Psychiatry* **4**, 486–500  
30  
31 717 (2017).  
32  
33 718 54. Lin, L. A. *et al.* Telemedicine-delivered treatment interventions for substance use disorders: A  
34  
35 719 systematic review. *J. Subst. Abuse Treat.* **101**, 38–49 (2019).  
36  
37 720 55. Boumparis, N., Karyotaki, E., Schaub, M. P., Cuijpers, P. & Riper, H. Internet interventions for adult  
38  
39 721 illicit substance users: a meta-analysis. *Addiction* **112**, 1521–1532 (2017).  
40  
41 722 56. Boumparis, N. *et al.* Short- and long-term effects of digital prevention and treatment interventions  
42  
43 723 for cannabis use reduction: A systematic review and meta-analysis. *Drug Alcohol Depend.* **200**, 82–  
44  
45 724 94 (2019).  
46  
47 725 57. Fu, Z., Burger, H., Arjadi, R. & Bockting, C. L. H. Effectiveness of digital psychological  
48  
49 726 interventions for mental health problems in low-income and middle-income countries: a systematic  
50  
51 727 review and meta-analysis. *Lancet Psychiatry* **7**, 851–864 (2020).  
52  
53 728 58. Fernandes, S. *et al.* Brief Motivational Intervention and telemedicine: a new perspective of treatment  
54  
55  
56  
57  
58  
59  
60

- 1  
2  
3 729 to marijuana users. *Addict. Behav.* **35**, 750–755 (2010).  
4  
5 730 59. Wongpakaran, T. *et al.* The effect of telephone-based intervention (TBI) in alcohol abusers: a pilot  
6  
7 731 study. *J. Med. Assoc. Thai.* **94**, 849–856 (2011).  
8  
9 732 60. Signor, L. *et al.* Efficacy of the telephone-based Brief Motivational Intervention for alcohol  
10  
11 733 problems in Brazil. *Braz J Psychiatry* **35**, 254–261 (2013).  
12  
13 734 61. Marasinghe, R. B., Edirippulige, S., Kavanagh, D., Smith, A. & Jiffry, M. T. M. Effect of mobile  
14  
15 735 phone-based psychotherapy in suicide prevention: a randomised controlled trial in Sri Lanka. *J.*  
16  
17 736 *Telemed. Telecare* **18**, 151–155 (2012).  
18  
19 737 62. Christoff, A. de O. & Boengen-Lacerda, R. Reducing substance involvement in college students: a  
20  
21 738 three-arm parallel-group randomised controlled trial of a computer-based intervention. *Addict.*  
22  
23 739 *Behav.* **45**, 164–171 (2015).  
24  
25 740 63. Baldin, Y. C., Sanudo, A. & Sanchez, Z. M. Effectiveness of a web-based intervention in reducing  
26  
27 741 binge drinking among nightclub patrons. *Rev. Saude Publica* **52**, 2 (2018).  
28  
29 742 64. Tiburcio, M., Lara, M. A., Martínez, N., Fernández, M. & Aguilar, A. Web-based intervention to  
30  
31 743 reduce substance abuse and depression: a three-arm randomised trial in Mexico. *Subst. Use Misuse*  
32  
33 744 **53**, 2220–2231 (2018).  
34  
35 745 65. Liang, D., Han, H., Du, J., Zhao, M. & Hser, Y.-I. A pilot study of a smartphone application  
36  
37 746 supporting recovery from drug addiction. *J. Subst. Abuse Treat.* **88**, 51–58 (2018).  
38  
39 747 66. Zhu, Y. *et al.* A newly designed mobile-based computerised cognitive addiction therapy app for the  
40  
41 748 improvement of cognition impairments and risk decision making in methamphetamine use disorder:  
42  
43 749 randomised controlled trial. *JMIR Mhealth Uhealth* **6**, e10292 (2018).  
44  
45 750 67. The Mobile Economy. *The Mobile Economy Asia Pacific 2020.*  
46  
47 751 <https://www.gsma.com/mobileeconomy/asiapacific> (2020).  
48  
49 752 68. Shore, J. H., Schneck, C. D. & Mishkind, M. C. Telepsychiatry and the Coronavirus Disease 2019  
50  
51 753 pandemic-current and future outcomes of the rapid virtualisation of psychiatric care. *JAMA*  
52  
53 754 *Psychiatry* (2020) doi:10.1001/jamapsychiatry.2020.1643.

- 1  
2  
3 755 69. Adepouju, P. Africa turns to telemedicine to close mental health gap. *Lancet Digit Health* **2**, e571–  
4  
5 756 e572 (2020).  
6  
7 757 70. Molfenter, T. *et al.* Use of telehealth in substance use disorder (SUD) services during and after  
8  
9 758 COVID-19. *JMIR Ment Health* (2021) doi:10.2196/25835.  
10  
11 759 71. Minas, H. Mental health in a post-pandemic ASEAN. *The ASEAN* 37–38 (2021).  
12  
13 760 72. Curran, G. M., Bauer, M., Mittman, B., Pyne, J. M. & Stetler, C. Effectiveness-implementation  
14  
15 761 hybrid designs: combining elements of clinical effectiveness and implementation research to  
16  
17 762 enhance public health impact. *Med. Care* **50**, 217–226 (2012).  
18  
19 763 73. United Nations Office on Drugs and Crime. *Guidance for Community-Based Treatment and Care*  
20  
21 764 *Services for People Affected by Drug Use and Dependence in Southeast Asia*.  
22  
23 765 [https://www.unodc.org/documents/southeastasiaandpacific/cbtx/cbtx\\_guidance\\_EN.pdf](https://www.unodc.org/documents/southeastasiaandpacific/cbtx/cbtx_guidance_EN.pdf) (2014).  
24  
25 766 74. Matsumoto T., Imamura F., Kobayashi O., Chiba Y. & Wada K. [Development and evaluation of a  
26  
27 767 relapse prevention tool for drug-abusing delinquents incarcerated in a juvenile classification home: a  
28  
29 768 self-teaching workbook for adolescents, the "SMARPP-Jr]. *Nihon Arukoru Yakubutsu Igakkai Zasshi*  
30  
31 769 **44**, 121–138 (2009).  
32  
33 770 75. Obert, J. L. *et al.* The matrix model of outpatient stimulant abuse treatment: history and description.  
34  
35 771 *J. Psychoactive Drugs* **32**, 157–164 (2000).  
36  
37 772 76. Kondo A. *et al.* [Evaluation of the relapse prevention program for substance abusers called  
38  
39 773 ‘TAMARPP’ at mental health and welfare center]. *Nihon Arukoru Yakubutsu Igakkai Zasshi* **49**,  
40  
41 774 119–135 (2014).  
42  
43 775 77. Matsumoto, T., Chiba, Y., Imamura, F., Kobayashi, O. & Wada, K. Possible effectiveness of  
44  
45 776 intervention using a self-teaching workbook in adolescent drug abusers detained in a juvenile  
46  
47 777 classification home. *Psychiatry Clin. Neurosci.* **65**, 576–583 (2011).  
48  
49 778 78. Tanibuchi Y. *et al.* [Efficacy of the Serigaya Methamphetamine Relapse Prevention Program  
50  
51 779 (SMARPP): for patients with drug use disorder: a study on factors influencing 1-year follow-up  
52  
53 780 outcomes]. *Nihon Arukoru Yakubutsu Igakkai Zasshi* **51**, 38–54 (2016).  
54  
55  
56  
57  
58  
59  
60

- 1  
2  
3 781 79. Rawson, R. A. *et al.* A comparison of contingency management and cognitive-behavioral approaches  
4  
5 782 during methadone maintenance treatment for cocaine dependence. *Arch. Gen. Psychiatry* **59**, 817–  
6  
7 783 824 (2002).  
8  
9 784 80. Carroll, K. M. *et al.* Toward empirical identification of a clinically meaningful indicator of treatment  
10  
11 785 outcome: features of candidate indicators and evaluation of sensitivity to treatment effects and  
12  
13 786 relationship to one year follow up cocaine use outcomes. *Drug Alcohol Depend.* **137**, 3–19 (2014).  
14  
15 787 81. Fals-Stewart, W., O’Farrell, T. J., Freitas, T. T., McFarlin, S. K. & Rutigliano, P. The timeline  
16  
17 788 followback reports of psychoactive substance use by drug-abusing patients: psychometric properties.  
18  
19 789 *J. Consult. Clin. Psychol.* **68**, 134–144 (2000).  
20  
21 790 82. Carey, K. B., Carey, M. P., Maisto, S. A. & Henson, J. M. Temporal stability of the timeline  
22  
23 791 followback interview for alcohol and drug use with psychiatric outpatients. *J. Stud. Alcohol* **65**, 774–  
24  
25 792 781 (2004).  
26  
27 793 83. McLellan, A. T., Luborsky, L., Woody, G. E. & O’Brien, C. P. An improved diagnostic evaluation  
28  
29 794 instrument for substance abuse patients. The Addiction Severity Index. *J. Nerv. Ment. Dis.* **168**, 26–  
30  
31 795 33 (1980).  
32  
33 796 84. Kosten, T. R., Rounsaville, B. J. & Kleber, H. D. Concurrent validity of the addiction severity index.  
34  
35 797 *J. Nerv. Ment. Dis.* **171**, 606–610 (1983).  
36  
37 798 85. Hendriks, V. M., Kaplan, C. D., van Limbeek, J. & Geerlings, P. The Addiction Severity Index:  
38  
39 799 reliability and validity in a Dutch addict population. *J. Subst. Abuse Treat.* **6**, 133–141 (1989).  
40  
41 800 86. Carise, D. *Addiction Severity Index Treatnet Version: Manual and Question by Question ‘Q by Q’*  
42  
43 801 *Guide.* (United Nations Office on Drugs and Crime, 2007).  
44  
45 802 87. Herdman, M. *et al.* Development and preliminary testing of the new five-level version of EQ-5D  
46  
47 803 (EQ-5D-5L). *Qual. Life Res.* **20**, 1727–1736 (2011).  
48  
49 804 88. Janssen, M. F. *et al.* Measurement properties of the EQ-5D-5L compared to the EQ-5D-3L across  
50  
51 805 eight patient groups: a multi-country study. *Quality of Life Research* vol. 22 1717–1727 (2013).  
52  
53 806 89. Purba, F. D. *et al.* The Indonesian EQ-5D-5L value set. *Pharmacoeconomics* **35**, 1153–1165 (2017).  
54  
55  
56  
57  
58  
59  
60

- 1  
2  
3 807 90. Rand, K., Arnevik, E. A. & Walderhaug, E. Quality of life among patients seeking treatment for  
4  
5 808 substance use disorder, as measured with the EQ-5D-3L. *J Patient Rep Outcomes* **4**, 92 (2020).  
6  
7 809 91. Goranitis, I. *et al.* Measuring health and broader well-being benefits in the context of opiate  
8  
9 810 dependence: the psychometric performance of the ICECAP-A and the EQ-5D-5L. *Value Health* **19**,  
10  
11 811 820–828 (2016).  
12  
13 812 92. McConaughy, E. A., Prochaska, J. O. & Velicer, W. F. Stages of change in psychotherapy:  
14  
15 813 Measurement and sample profiles. *Group Dyn.* **20**, 368–375 (1983).  
16  
17 814 93. DiClemente, C. C., Schlundt, D. & Gemmell, L. Readiness and stages of change in addiction  
18  
19 815 treatment. *Am. J. Addict.* **13**, 103–119 (2004).  
20  
21 816 94. Carver, C. S. You want to measure coping but your protocol's too long: consider the brief COPE.  
22  
23 817 *Int. J. Behav. Med.* **4**, 92–100 (1997).  
24  
25 818 95. Berg, M. K., Hobkirk, A. L., Joska, J. A. & Meade, C. S. The role of substance use coping in the  
26  
27 819 relation between childhood sexual abuse and depression among methamphetamine users in South  
28  
29 820 Africa. *Psychol. Trauma* **9**, 493–499 (2017).  
30  
31 821 96. Derogatis, L. R. & Savitz, K. L. The SCL-90-R, brief symptom inventory, and matching clinical  
32  
33 822 rating scales. in *The Use of Psychological Testing for Treatment Planning and Outcomes Assessment*  
34  
35 823 (ed. Maruish, M. E.) vol. 2 679–724 (Mahwah, NJ, US, 1999).  
36  
37 824 97. Bergly, T. H., Nordfjærn, T. & Hagen, R. The dimensional structure of SCL-90-R in a sample of  
38  
39 825 patients with substance use disorder. *J. Subst. Use* **19**, 257–261 (2014).  
40  
41 826 98. Ryan, J. J. & Geisser, M. E. Validity and diagnostic accuracy of an alternate form of the Rey  
42  
43 827 Auditory Verbal Learning Test. *Arch. Clin. Neuropsychol.* **1**, 209–217 (1986).  
44  
45 828 99. Potvin, S. *et al.* Cognitive deficits in individuals with methamphetamine use disorder: A meta-  
46  
47 829 analysis. *Addict. Behav.* **80**, 154–160 (2018).  
48  
49 830 100. Rosa, B. *et al.* Cognitive improvement via mHealth for patients recovering from substance use  
50  
51 831 disorder. in *International Workshops on ICTs for Improving Patients Rehabilitation Research*  
52  
53 832 *Techniques* 69–82 (Springer International Publishing, 2017).  
54  
55  
56  
57  
58  
59  
60



- 1  
2  
3 833 101. Larsen, D. L., Attkisson, C. C., Hargreaves, W. A. & Nguyen, T. D. Assessment of client/patient  
4  
5 834 satisfaction: development of a general scale. *Eval. Program Plann.* **2**, 197–207 (1979).  
6  
7 835 102. Boden, M. T. *et al.* Seeking Safety treatment for male veterans with a substance use disorder and  
8  
9 836 post-traumatic stress disorder symptomatology. *Addiction* **107**, 578–586 (2012).  
10  
11 837 103. Marziliano, A., Pessin, H., Rosenfeld, B. & Breitbart, W. Measuring Cohesion and Self-Disclosure  
12  
13 838 in Psychotherapy Groups for Patients with Advanced Cancer: An Analysis of the Psychometric  
14  
15 839 Properties of the Group Therapy Experience Scale. *Int. J. Group Psychother.* **68**, 407–427 (2018).  
16  
17 840 104. Kish, L. *Survey sampling*. (Wiley, 1965).  
18  
19 841 105. Takano, A., Miyamoto, Y., Shinozaki, T., Matsumoto, T. & Kawakami, N. Effect of a web-based  
20  
21 842 relapse prevention program on abstinence among Japanese drug users: A pilot randomised controlled  
22  
23 843 trial. *J. Subst. Abuse Treat.* **111**, 37–46 (2020).  
24  
25 844 106. Iachina, M. The evaluation of the performance of IPWGEE, a simulation study. *Communications in*  
26  
27 845 *Statistics - Simulation and Computation* **38**, 1212–1227 (2009).  
28  
29 846 107. Rush, K. L., Howlett, L., Munro, A. & Burton, L. Videoconference compared to telephone in  
30  
31 847 healthcare delivery: A systematic review. *Int. J. Med. Inform.* **118**, 44–53 (2018).  
32  
33 848 108. Spek, V. *et al.* Internet-based cognitive behaviour therapy for symptoms of depression and anxiety: a  
34  
35 849 meta-analysis. *Psychol. Med.* **37**, 319–328 (2007).  
36  
37 850 109. Patsopoulos, N. A. A pragmatic view on pragmatic trials. *Dialogues Clin. Neurosci.* **13**, 217–224  
38  
39 851 (2011).  
40  
41  
42  
43  
44 852

853

**Table 1.** Recruitment sites in this study

| Name                          | Location | Type                                          | Treatment as usual                                                                                           | Most reported primarily used substance                  |
|-------------------------------|----------|-----------------------------------------------|--------------------------------------------------------------------------------------------------------------|---------------------------------------------------------|
| Cipto Mangunkusumo Hospital   | Jakarta  | Tertiary national general hospital            | Individual psychotherapy, symptomatic pharmacotherapy                                                        | Benzodiazepine                                          |
| Aceh Mental Hospital          | Aceh     | Tertiary provincial mental hospital           | Individual psychotherapy, symptomatic pharmacotherapy                                                        | Methamphetamine                                         |
| Duren Sawit Regional Hospital | Jakarta  | Tertiary regional general hospital            | Individual psychotherapy, symptomatic pharmacotherapy, opioid substitution therapy (buprenorphine, naloxone) | Opioid                                                  |
| Karisma Foundation            | Jakarta  | Rehabilitation center                         | Individual and group peer counselling                                                                        | Methamphetamine, opioid                                 |
| Kapeta Foundation             | Banten   | Rehabilitation center                         | Individual and group peer counselling                                                                        | Methamphetamine, benzodiazepine, synthetic cannabinoids |
| Kios Atma Jaya                | Jakarta  | Rehabilitation center and regional HIV clinic | Individual psychotherapy, group peer counselling, outreach program                                           | Opioid                                                  |
| Puskesmas Jatinegara          | Jakarta  | Primary health care                           | Counselling, symptomatic pharmacotherapy, methadone maintenance therapy                                      | Heroin                                                  |
| Puskesmas Gambir              | Jakarta  | Primary health care                           | Counselling, symptomatic pharmacotherapy, methadone maintenance therapy                                      | Heroin                                                  |

854 Counselling focuses on education and giving advice.

855 Symptomatic pharmacotherapy gives medication for helping patients with specific psychopathologies.

856 Psychotherapy aims to help a person identify and change troubling emotions, thoughts, and behaviour.

857

**Table 2.** Outcome and measurement

| Outcome                           | Measurement                                                   | Data for analysis                                                                                                                                                     | Type and score range                                                                          | Hypothesis for intervention (vs control)          | Assessment time point         |                                 |                               |
|-----------------------------------|---------------------------------------------------------------|-----------------------------------------------------------------------------------------------------------------------------------------------------------------------|-----------------------------------------------------------------------------------------------|---------------------------------------------------|-------------------------------|---------------------------------|-------------------------------|
|                                   |                                                               |                                                                                                                                                                       |                                                                                               |                                                   | T1                            | T2                              | T3                            |
| <b>Primary outcome</b>            |                                                               |                                                                                                                                                                       |                                                                                               |                                                   |                               |                                 |                               |
| Abstinence from primary substance | Timeline followback (TLFB) for the past 30 days               | Number of days being abstinent from primary substance divided by 30 (%).                                                                                              | Continuous, 0 (no use) to 100 (used every day).                                               | Higher                                            | ✓<br><input type="checkbox"/> | ✓ <input type="checkbox"/><br>a | ✓<br><input type="checkbox"/> |
| <b>Secondary outcomes</b>         |                                                               |                                                                                                                                                                       |                                                                                               |                                                   |                               |                                 |                               |
| Addiction severity                | Addiction Severity Index (ASI)                                | 7 composite scores: medical, employment, alcohol use, drug use, legal, family/social, and psychiatric status. Each composite score calculated using standard formula. | Continuous, 0 (no problems) to 1 (severe problems).                                           | Lower                                             | ✓<br><input type="checkbox"/> | ✓ <input type="checkbox"/>      | ✓<br><input type="checkbox"/> |
| Health-related quality of life    | EuroQoI-5D (EQ-5D-5L)                                         | Health utility score, calculated from 5 items on mobility, self-care, usual activities, pain/discomfort and anxiety/depression, using Indonesian value set.           | Continuous, -0.865 (impaired health) to 1 (full health).                                      | Higher                                            | ✓<br><input type="checkbox"/> | ✓ <input type="checkbox"/>      | ✓<br><input type="checkbox"/> |
| Motivation to change              | University of Rhode Island Change Assessment (URICA)          | Action stage subscale, sum of 8 items.                                                                                                                                | Continuous, 8 (not active in behavioural change) to 40 (highly active in behavioural change). | Higher                                            | ✓<br><input type="checkbox"/> | ✓ <input type="checkbox"/>      | ✓<br><input type="checkbox"/> |
| Coping strategies                 | Brief-Coping Orientation to Problems Experienced (Brief COPE) | 3 subscales: problem-focused, emotion-focused, and dysfunctional coping. Sum of 6, 10, 12 items, respectively.                                                        | Continuous, problem-focused 6 to 24, emotion-focused 10 to 40, dysfunctional 12 to 48.        | Lower in dysfunctional, higher in the others      | ✓<br><input type="checkbox"/> | ✓ <input type="checkbox"/>      | ✓<br><input type="checkbox"/> |
| Psychiatric symptoms              | Symptom Checklist-90 Revised (SCL-90-R)                       | Global Severity Index (GSI), average of 90 items.                                                                                                                     | Continuous, 0 (no symptoms) to 4 (severe symptoms).                                           | Lower                                             | ✓<br><input type="checkbox"/> | ✓ <input type="checkbox"/>      | ✓<br><input type="checkbox"/> |
| Cognitive function                | Rey Auditory Verbal Learning Test (RAVLT)                     | 3 test results; immediate, learning, and recalling.                                                                                                                   | Continuous, 0 (low functioning) to 15 (high functioning).                                     | Higher                                            | ✓<br><input type="checkbox"/> | ✓ <input type="checkbox"/>      | ✓<br><input type="checkbox"/> |
| <b>Implementation outcomes</b>    |                                                               |                                                                                                                                                                       |                                                                                               |                                                   |                               |                                 |                               |
| Retention in treatment            | Self-reporting for the past 3 months                          | Coded as 'retained' if they had therapeutic contacts in at least 75% of the planned number of therapeutic contacts.                                                   | Categorical, 'retained' = 1, 'not retained' = 0.                                              | More 'retained'                                   |                               | ✓ <input type="checkbox"/>      | ✓<br><input type="checkbox"/> |
| Treatment satisfaction            | Client Satisfaction Questionnaire-3 (CSQ-3)                   | Sum of 3 items.                                                                                                                                                       | Continuous, 4 (not satisfied) to 12 (satisfied).                                              | Higher                                            |                               | ✓ <input type="checkbox"/>      |                               |
| Group cohesion                    | Group Therapy Experience Scale (GTES)                         | Sum of 16 items.                                                                                                                                                      | Continuous, 16 (poor cohesion) to 80 (great cohesion).                                        | Not applicable: measured only in intervention arm |                               | ✓ <input type="checkbox"/>      |                               |

<sup>a</sup> Objective validation by urine drug test for 8 substances: alcohol, amphetamine, morphine, cannabinoids, methamphetamine, benzodiazepine, cocaine, synthetic cannabinoids

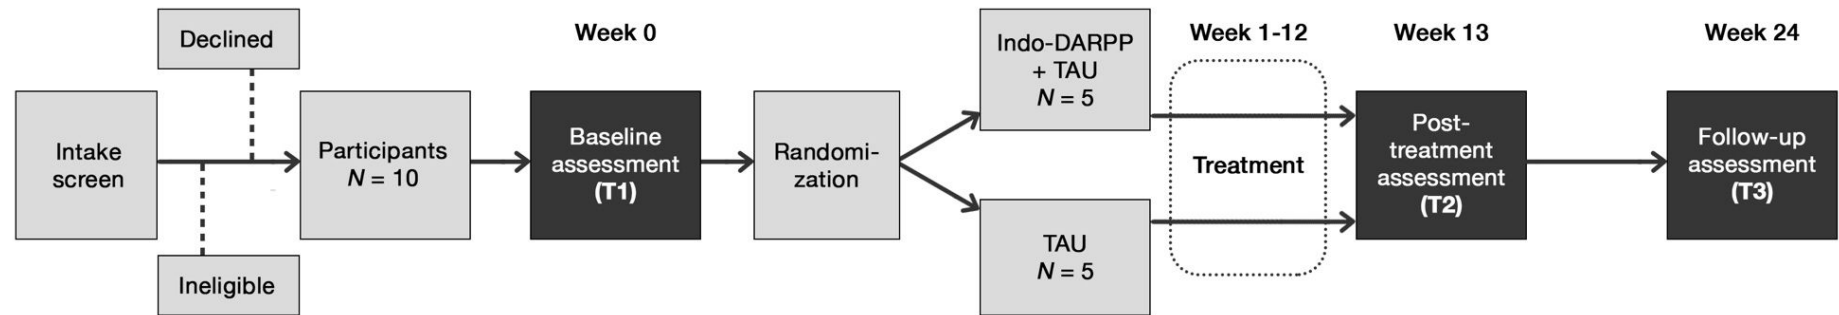

**Figure 1.** Study flowchart for each site. A total of 20 participants will be recruited through the social network of each site. After 10 participants have been recruited to constitute one wave, randomisation will be done to allocate participants into two groups: intervention (Indo-DARPP + TAU) and control (TAU only), with 5 participants in each group. Recruitment will be continued until another 10 participants (second wave) joined before randomisation and allocation similar as before. Treatment period will be 12 weeks. Assessments will be done 3 times: T1 (Week 0) during baseline or before randomisation, T2 (Week 13-16) during post-assessment or 1-4 weeks after treatment period ends, and T3 (Week 24) during 3 months after treatment ends.

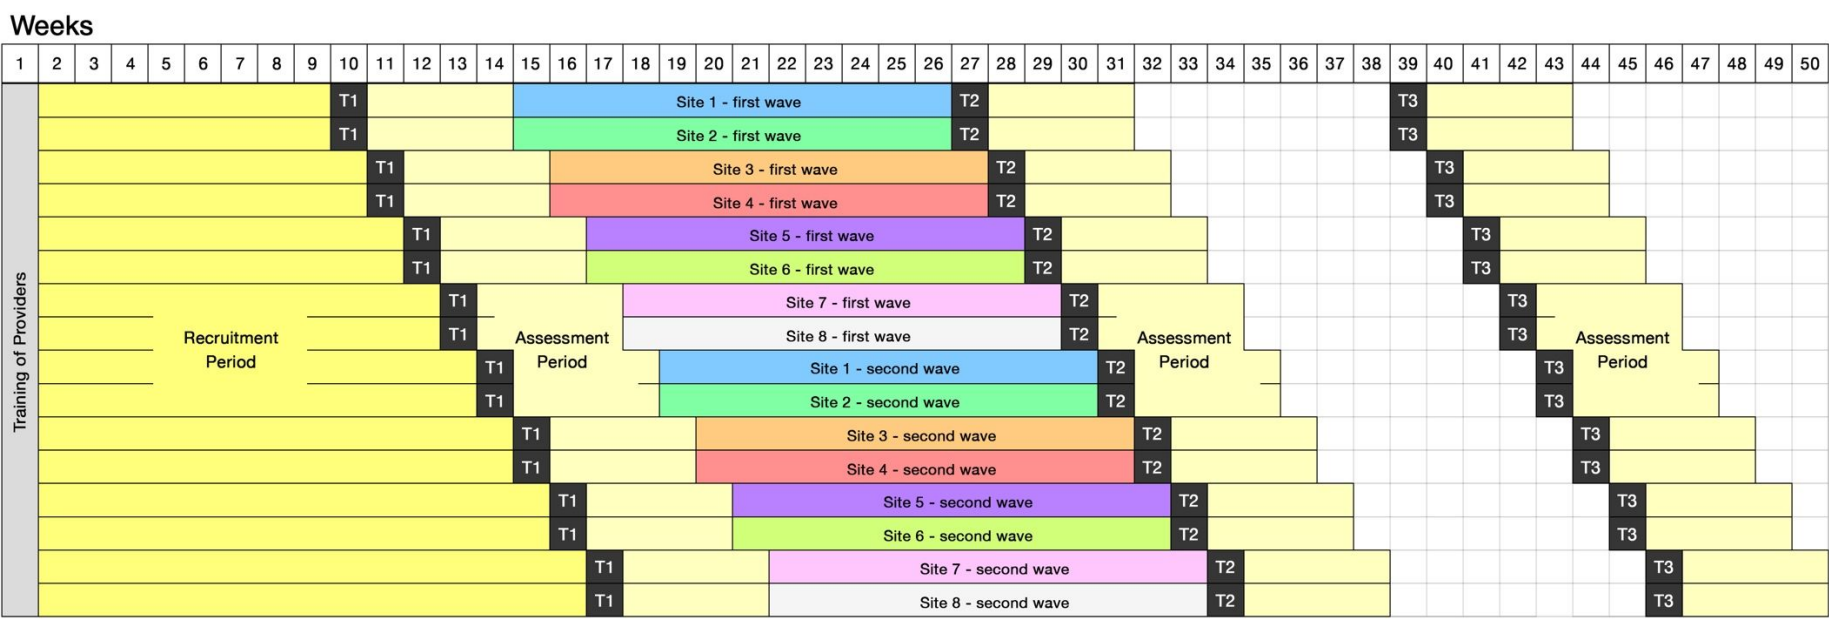

**Figure 2.** Planned trial schedule across all 8 research sites. Staggered schedules were designed to spread the workload of providers in regard to Indo-DARPP intervention, as well as research staff in regard to assessments. After training of providers, all sites were given approximately 1-2 months to recruit at least 20 participants. Sites with relatively higher potential to recruit faster, i.e., those with higher rate of patient turnover, were selected ahead in the schedule. Each site will have 2 waves of recruitment and treatment period.

# Reporting checklist for protocol of a clinical trial.

Based on the SPIRIT guidelines.

## Instructions to authors

Complete this checklist by entering the page numbers from your manuscript where readers will find each of the items listed below.

Your article may not currently address all the items on the checklist. Please modify your text to include the missing information. If you are certain that an item does not apply, please write "n/a" and provide a short explanation.

Upload your completed checklist as an extra file when you submit to a journal.

In your methods section, say that you used the SPIRIT reporting guidelines, and cite them as:

Chan A-W, Tetzlaff JM, Gøtzsche PC, Altman DG, Mann H, Berlin J, Dickersin K, Hróbjartsson A, Schulz KF, Parulekar WR, Krleža-Jerić K, Laupacis A, Moher D. SPIRIT 2013 Explanation and Elaboration: Guidance for protocols of clinical trials. *BMJ*. 2013;346:e7586

|                                   | Reporting Item                                                                                                                  | Page Number                                       |
|-----------------------------------|---------------------------------------------------------------------------------------------------------------------------------|---------------------------------------------------|
| <b>Administrative information</b> |                                                                                                                                 |                                                   |
| Title                             | <a href="#">#1</a> Descriptive title identifying the study design, population, interventions, and, if applicable, trial acronym | 1                                                 |
| Trial registration                | <a href="#">#2a</a> Trial identifier and registry name. If not yet registered, name of intended registry                        | 4, 23                                             |
| Trial registration: data set      | <a href="#">#2b</a> All items from the World Health Organization Trial Registration Data Set                                    | n/a, trial already registered as described in 2a. |
| Protocol version                  | <a href="#">#3</a> Date and version identifier                                                                                  | 23                                                |
| Funding                           | <a href="#">#4</a> Sources and types of financial, material, and other support                                                  | 26-27                                             |
| Roles and                         | <a href="#">#5a</a> Names, affiliations, and roles of protocol                                                                  | 26                                                |

|    |                      |                     |                                                    |
|----|----------------------|---------------------|----------------------------------------------------|
| 1  | responsibilities:    | contributors        |                                                    |
| 2  | contributorship      |                     |                                                    |
| 3  |                      |                     |                                                    |
| 4  | Roles and            | <a href="#">#5b</a> | Name and contact information for the trial         |
| 5  | responsibilities:    |                     | sponsor                                            |
| 6  | sponsor contact      |                     |                                                    |
| 7  | information          |                     |                                                    |
| 8  |                      |                     |                                                    |
| 9  |                      |                     |                                                    |
| 10 |                      |                     |                                                    |
| 11 | Roles and            | <a href="#">#5c</a> | Role of study sponsor and funders, if any, in      |
| 12 | responsibilities:    |                     | study design; collection, management,              |
| 13 | sponsor and funder   |                     | analysis, and interpretation of data; writing of   |
| 14 |                      |                     | the report; and the decision to submit the         |
| 15 |                      |                     | report for publication, including whether they     |
| 16 |                      |                     | will have ultimate authority over any of these     |
| 17 |                      |                     | activities                                         |
| 18 |                      |                     |                                                    |
| 19 |                      |                     |                                                    |
| 20 |                      |                     |                                                    |
| 21 |                      |                     |                                                    |
| 22 |                      |                     |                                                    |
| 23 | Roles and            | <a href="#">#5d</a> | Composition, roles, and responsibilities of the    |
| 24 | responsibilities:    |                     | coordinating centre, steering committee,           |
| 25 | committees           |                     | endpoint adjudication committee, data              |
| 26 |                      |                     | management team, and other individuals or          |
| 27 |                      |                     | groups overseeing the trial, if applicable (see    |
| 28 |                      |                     | Item 21a for data monitoring committee)            |
| 29 |                      |                     |                                                    |
| 30 |                      |                     |                                                    |
| 31 |                      |                     |                                                    |
| 32 |                      |                     |                                                    |
| 33 | <b>Introduction</b>  |                     |                                                    |
| 34 |                      |                     |                                                    |
| 35 | Background and       | <a href="#">#6a</a> | Description of research question and               |
| 36 | rationale            |                     | justification for undertaking the trial, including |
| 37 |                      |                     | summary of relevant studies (published and         |
| 38 |                      |                     | unpublished) examining benefits and harms          |
| 39 |                      |                     | for each intervention                              |
| 40 |                      |                     |                                                    |
| 41 |                      |                     |                                                    |
| 42 |                      |                     |                                                    |
| 43 |                      |                     |                                                    |
| 44 | Background and       | <a href="#">#6b</a> | Explanation for choice of comparators              |
| 45 | rationale: choice of |                     |                                                    |
| 46 | comparators          |                     |                                                    |
| 47 |                      |                     |                                                    |
| 48 |                      |                     |                                                    |
| 49 | Objectives           | <a href="#">#7</a>  | Specific objectives or hypotheses                  |
| 50 |                      |                     |                                                    |
| 51 |                      |                     |                                                    |
| 52 | Trial design         | <a href="#">#8</a>  | Description of trial design including type of      |
| 53 |                      |                     | trial (eg, parallel group, crossover, factorial,   |
| 54 |                      |                     | single group), allocation ratio, and framework     |
| 55 |                      |                     | (eg, superiority, equivalence, non-inferiority,    |
| 56 |                      |                     | exploratory)                                       |
| 57 |                      |                     |                                                    |
| 58 |                      |                     |                                                    |
| 59 |                      |                     |                                                    |
| 60 |                      |                     |                                                    |

1 **Methods:**

2 **Participants,**

3 **interventions, and**

4 **outcomes**

5

6

7

|                                    |                      |                                                                                                                                                                                                                                                                             |       |
|------------------------------------|----------------------|-----------------------------------------------------------------------------------------------------------------------------------------------------------------------------------------------------------------------------------------------------------------------------|-------|
| 8 Study setting                    | <a href="#">#9</a>   | Description of study settings (eg, community clinic, academic hospital) and list of countries where data will be collected. Reference to where list of study sites can be obtained                                                                                          | 10-11 |
| 15 Eligibility criteria            | <a href="#">#10</a>  | Inclusion and exclusion criteria for participants. If applicable, eligibility criteria for study centres and individuals who will perform the interventions (eg, surgeons, psychotherapists)                                                                                | 11    |
| 24 Interventions: description      | <a href="#">#11a</a> | Interventions for each group with sufficient detail to allow replication, including how and when they will be administered                                                                                                                                                  | 13    |
| 29 Interventions: modifications    | <a href="#">#11b</a> | Criteria for discontinuing or modifying allocated interventions for a given trial participant (eg, drug dose change in response to harms, participant request, or improving / worsening disease)                                                                            | 22-23 |
| 38 Interventions: adherence        | <a href="#">#11c</a> | Strategies to improve adherence to intervention protocols, and any procedures for monitoring adherence (eg, drug tablet return; laboratory tests)                                                                                                                           | 22-23 |
| 45 Interventions: concomitant care | <a href="#">#11d</a> | Relevant concomitant care and interventions that are permitted or prohibited during the trial                                                                                                                                                                               | 15    |
| 50 Outcomes                        | <a href="#">#12</a>  | Primary, secondary, and other outcomes, including the specific measurement variable (eg, systolic blood pressure), analysis metric (eg, change from baseline, final value, time to event), method of aggregation (eg, median, proportion), and time point for each outcome. | 15-19 |



1 Explanation of the clinical relevance of  
 2 chosen efficacy and harm outcomes is  
 3 strongly recommended  
 4

5  
 6 Participant timeline [#13](#) Time schedule of enrolment, interventions 10, 19, 26  
 7 (including any run-ins and washouts),  
 8 assessments, and visits for participants. A  
 9 schematic diagram is highly recommended  
 10 (see Figure)  
 11  
 12

13  
 14 Sample size [#14](#) Estimated number of participants needed to 20  
 15 achieve study objectives and how it was  
 16 determined, including clinical and statistical  
 17 assumptions supporting any sample size  
 18 calculations  
 19  
 20  
 21  
 22

23 Recruitment [#15](#) Strategies for achieving adequate participant 11  
 24 enrolment to reach target sample size  
 25  
 26

27 **Methods:**  
 28 **Assignment of**  
 29 **interventions (for**  
 30 **controlled trials)**  
 31  
 32  
 33

34 Allocation: [#16a](#) Method of generating the allocation 12  
 35 sequence  
 36 generation  
 37 (eg, computer-generated random  
 38 numbers), and list of any factors for  
 39 stratification. To reduce predictability of a  
 40 random sequence, details of any planned  
 41 restriction (eg, blocking) should be provided  
 42 in a separate document that is unavailable to  
 43 those who enrol participants or assign  
 44 interventions  
 45  
 46  
 47  
 48

49 Allocation [#16b](#) Mechanism of implementing the allocation 12  
 50 concealment  
 51 mechanism  
 52 (eg, central telephone; sequentially  
 53 numbered, opaque, sealed envelopes),  
 54 describing any steps to conceal the  
 55 sequence until interventions are assigned  
 56  
 57

58 Allocation: [#16c](#) Who will generate the allocation sequence, 12  
 59  
 60

|    |                        |                      |                                                |                         |
|----|------------------------|----------------------|------------------------------------------------|-------------------------|
| 1  | implementation         |                      | who will enrol participants, and who will      |                         |
| 2  |                        |                      | assign participants to interventions           |                         |
| 3  |                        |                      |                                                |                         |
| 4  | Blinding (masking)     | <a href="#">#17a</a> | Who will be blinded after assignment to        | 12, 19                  |
| 5  |                        |                      | interventions (eg, trial participants, care    |                         |
| 6  |                        |                      | providers, outcome assessors, data             |                         |
| 7  |                        |                      | analysts), and how                             |                         |
| 8  |                        |                      |                                                |                         |
| 9  |                        |                      |                                                |                         |
| 10 |                        |                      |                                                |                         |
| 11 | Blinding (masking):    | <a href="#">#17b</a> | If blinded, circumstances under which          | n/a, only assessors are |
| 12 | emergency              |                      | unblinding is permissible, and procedure for   | blinded                 |
| 13 | unblinding             |                      | revealing a participant's allocated            |                         |
| 14 |                        |                      | intervention during the trial                  |                         |
| 15 |                        |                      |                                                |                         |
| 16 |                        |                      |                                                |                         |
| 17 |                        |                      |                                                |                         |
| 18 | <b>Methods: Data</b>   |                      |                                                |                         |
| 19 | <b>collection,</b>     |                      |                                                |                         |
| 20 | <b>management, and</b> |                      |                                                |                         |
| 21 | <b>analysis</b>        |                      |                                                |                         |
| 22 |                        |                      |                                                |                         |
| 23 |                        |                      |                                                |                         |
| 24 |                        |                      |                                                |                         |
| 25 | Data collection plan   | <a href="#">#18a</a> | Plans for assessment and collection of         | 15-19                   |
| 26 |                        |                      | outcome, baseline, and other trial data,       |                         |
| 27 |                        |                      | including any related processes to promote     |                         |
| 28 |                        |                      | data quality (eg, duplicate measurements,      |                         |
| 29 |                        |                      | training of assessors) and a description of    |                         |
| 30 |                        |                      | study instruments (eg, questionnaires,         |                         |
| 31 |                        |                      | laboratory tests) along with their reliability |                         |
| 32 |                        |                      | and validity, if known. Reference to where     |                         |
| 33 |                        |                      | data collection forms can be found, if not in  |                         |
| 34 |                        |                      | the protocol                                   |                         |
| 35 |                        |                      |                                                |                         |
| 36 |                        |                      |                                                |                         |
| 37 |                        |                      |                                                |                         |
| 38 |                        |                      |                                                |                         |
| 39 |                        |                      |                                                |                         |
| 40 |                        |                      |                                                |                         |
| 41 |                        |                      |                                                |                         |
| 42 | Data collection plan:  | <a href="#">#18b</a> | Plans to promote participant retention and     | 19, 22-23               |
| 43 | retention              |                      | complete follow-up, including list of any      |                         |
| 44 |                        |                      | outcome data to be collected for participants  |                         |
| 45 |                        |                      | who discontinue or deviate from intervention   |                         |
| 46 |                        |                      | protocols                                      |                         |
| 47 |                        |                      |                                                |                         |
| 48 |                        |                      |                                                |                         |
| 49 |                        |                      |                                                |                         |
| 50 |                        |                      |                                                |                         |
| 51 | Data management        | <a href="#">#19</a>  | Plans for data entry, coding, security, and    | 23                      |
| 52 |                        |                      | storage, including any related processes to    |                         |
| 53 |                        |                      | promote data quality (eg, double data entry;   |                         |
| 54 |                        |                      | range checks for data values). Reference to    |                         |
| 55 |                        |                      | where details of data management               |                         |
| 56 |                        |                      | procedures can be found, if not in the         |                         |
| 57 |                        |                      |                                                |                         |
| 58 |                        |                      |                                                |                         |
| 59 |                        |                      |                                                |                         |
| 60 |                        |                      |                                                |                         |

|    |                        |                                                                     |                         |
|----|------------------------|---------------------------------------------------------------------|-------------------------|
| 1  |                        | protocol                                                            |                         |
| 2  |                        |                                                                     |                         |
| 3  | Statistics: outcomes   | <a href="#">#20a</a> Statistical methods for analysing primary and  | 20-22                   |
| 4  |                        | secondary outcomes. Reference to where                              |                         |
| 5  |                        | other details of the statistical analysis plan                      |                         |
| 6  |                        | can be found, if not in the protocol                                |                         |
| 7  |                        |                                                                     |                         |
| 8  |                        |                                                                     |                         |
| 9  |                        |                                                                     |                         |
| 10 | Statistics: additional | <a href="#">#20b</a> Methods for any additional analyses (eg,       | 21-22                   |
| 11 | analyses               | subgroup and adjusted analyses)                                     |                         |
| 12 |                        |                                                                     |                         |
| 13 |                        |                                                                     |                         |
| 14 | Statistics: analysis   | <a href="#">#20c</a> Definition of analysis population relating to  | 21                      |
| 15 | population and         | protocol non-adherence (eg, as randomised                           |                         |
| 16 | missing data           | analysis), and any statistical methods to                           |                         |
| 17 |                        | handle missing data (eg, multiple imputation)                       |                         |
| 18 |                        |                                                                     |                         |
| 19 |                        |                                                                     |                         |
| 20 |                        |                                                                     |                         |
| 21 | <b>Methods:</b>        |                                                                     |                         |
| 22 | <b>Monitoring</b>      |                                                                     |                         |
| 23 |                        |                                                                     |                         |
| 24 |                        |                                                                     |                         |
| 25 | Data monitoring:       | <a href="#">#21a</a> Composition of data monitoring committee       | 23, DMC will not be     |
| 26 | formal committee       | (DMC); summary of its role and reporting                            | convened as the         |
| 27 |                        | structure; statement of whether it is                               | intervention involves a |
| 28 |                        | independent from the sponsor and competing                          | short-term              |
| 29 |                        | interests; and reference to where further                           | psychotherapy with      |
| 30 |                        | details about its charter can be found, if not in                   | known minimal risk.     |
| 31 |                        | the protocol. Alternatively, an explanation of                      |                         |
| 32 |                        | why a DMC is not needed                                             |                         |
| 33 |                        |                                                                     |                         |
| 34 |                        |                                                                     |                         |
| 35 |                        |                                                                     |                         |
| 36 |                        |                                                                     |                         |
| 37 |                        |                                                                     |                         |
| 38 | Data monitoring:       | <a href="#">#21b</a> Description of any interim analyses and        | 23, interim analysis is |
| 39 | interim analysis       | stopping guidelines, including who will have                        | not planned due to the  |
| 40 |                        | access to these interim results and make the                        | short duration of       |
| 41 |                        | final decision to terminate the trial                               | intervention.           |
| 42 |                        |                                                                     |                         |
| 43 |                        |                                                                     |                         |
| 44 |                        |                                                                     |                         |
| 45 | Harms                  | <a href="#">#22</a> Plans for collecting, assessing, reporting, and | 22-23                   |
| 46 |                        | managing solicited and spontaneously                                |                         |
| 47 |                        | reported adverse events and other                                   |                         |
| 48 |                        | unintended effects of trial interventions or trial                  |                         |
| 49 |                        | conduct                                                             |                         |
| 50 |                        |                                                                     |                         |
| 51 |                        |                                                                     |                         |
| 52 |                        |                                                                     |                         |
| 53 |                        |                                                                     |                         |
| 54 | Auditing               | <a href="#">#23</a> Frequency and procedures for auditing trial     | 23, there will be no    |
| 55 |                        | conduct, if any, and whether the process will                       | auditing process by     |
| 56 |                        | be independent from investigators and the                           | independent             |
| 57 |                        | sponsor                                                             | investigators.          |
| 58 |                        |                                                                     |                         |
| 59 |                        |                                                                     |                         |
| 60 |                        |                                                                     |                         |

## Ethics and dissemination

|                                      |                      |                                                                                                                                                                                                                                    |                                                                                           |
|--------------------------------------|----------------------|------------------------------------------------------------------------------------------------------------------------------------------------------------------------------------------------------------------------------------|-------------------------------------------------------------------------------------------|
| Research ethics approval             | <a href="#">#24</a>  | Plans for seeking research ethics committee / institutional review board (REC / IRB) approval                                                                                                                                      | 23, 28                                                                                    |
| Protocol amendments                  | <a href="#">#25</a>  | Plans for communicating important protocol modifications (eg, changes to eligibility criteria, outcomes, analyses) to relevant parties (eg, investigators, REC / IRBs, trial participants, trial registries, journals, regulators) | 23                                                                                        |
| Consent or assent                    | <a href="#">#26a</a> | Who will obtain informed consent or assent from potential trial participants or authorised surrogates, and how (see Item 32)                                                                                                       | 23                                                                                        |
| Consent or assent: ancillary studies | <a href="#">#26b</a> | Additional consent provisions for collection and use of participant data and biological specimens in ancillary studies, if applicable                                                                                              | 23                                                                                        |
| Confidentiality                      | <a href="#">#27</a>  | How personal information about potential and enrolled participants will be collected, shared, and maintained in order to protect confidentiality before, during, and after the trial                                               | 23                                                                                        |
| Declaration of interests             | <a href="#">#28</a>  | Financial and other competing interests for principal investigators for the overall trial and each study site                                                                                                                      | 27                                                                                        |
| Data access                          | <a href="#">#29</a>  | Statement of who will have access to the final trial dataset, and disclosure of contractual agreements that limit such access for investigators                                                                                    | 28                                                                                        |
| Ancillary and post trial care        | <a href="#">#30</a>  | Provisions, if any, for ancillary and post-trial care, and for compensation to those who suffer harm from trial participation                                                                                                      | 15, CBT intervention will be made available for control group after the end of the study. |

|    |                       |                      |                                                   |        |
|----|-----------------------|----------------------|---------------------------------------------------|--------|
| 1  | Dissemination         | <a href="#">#31a</a> | Plans for investigators and sponsor to            | 23     |
| 2  | policy: trial results |                      | communicate trial results to participants,        |        |
| 3  |                       |                      | healthcare professionals, the public, and         |        |
| 4  |                       |                      | other relevant groups (eg, via publication,       |        |
| 5  |                       |                      | reporting in results databases, or other data     |        |
| 6  |                       |                      | sharing arrangements), including any              |        |
| 7  |                       |                      | publication restrictions                          |        |
| 8  |                       |                      |                                                   |        |
| 9  |                       |                      |                                                   |        |
| 10 |                       |                      |                                                   |        |
| 11 |                       |                      |                                                   |        |
| 12 |                       |                      |                                                   |        |
| 13 | Dissemination         | <a href="#">#31b</a> | Authorship eligibility guidelines and any         | 26-27  |
| 14 | policy: authorship    |                      | intended use of professional writers              |        |
| 15 |                       |                      |                                                   |        |
| 16 |                       |                      |                                                   |        |
| 17 | Dissemination         | <a href="#">#31c</a> | Plans, if any, for granting public access to the  | 28     |
| 18 | policy: reproducible  |                      | full protocol, participant-level dataset, and     |        |
| 19 | research              |                      | statistical code                                  |        |
| 20 |                       |                      |                                                   |        |
| 21 |                       |                      |                                                   |        |
| 22 | <b>Appendices</b>     |                      |                                                   |        |
| 23 |                       |                      |                                                   |        |
| 24 |                       |                      |                                                   |        |
| 25 | Informed consent      | <a href="#">#32</a>  | Model consent form and other related              | 11, 23 |
| 26 | materials             |                      | documentation given to participants and           |        |
| 27 |                       |                      | authorised surrogates                             |        |
| 28 |                       |                      |                                                   |        |
| 29 |                       |                      |                                                   |        |
| 30 | Biological            | <a href="#">#33</a>  | Plans for collection, laboratory evaluation,      | 16     |
| 31 | specimens             |                      | and storage of biological specimens for           |        |
| 32 |                       |                      | genetic or molecular analysis in the current      |        |
| 33 |                       |                      | trial and for future use in ancillary studies, if |        |
| 34 |                       |                      | applicable                                        |        |
| 35 |                       |                      |                                                   |        |
| 36 |                       |                      |                                                   |        |
| 37 |                       |                      |                                                   |        |
| 38 |                       |                      |                                                   |        |

#### Notes:

- 2b: n/a, trial already registered as described in 2a.
- 5b: n/a, no trial sponsor.
- 5c: n/a, no involvement of funders in the study design.
- 5d: n/a, no direct intervention in the study design by the host universities.
- 17b: n/a, only assessors are blinded
- 21a: 23, DMC will not be convened as the intervention involves a short-term psychotherapy with known minimal risk.
- 21b: 23, interim analysis is not planned due to the short duration of intervention.

- 1
- 2
- 3
- 4
- 5
- 6
- 7
- 8
- 9
- 10
- 11
- 12
- 13
- 14
- 15
- 16
- 17
- 18
- 19
- 20
- 21
- 22
- 23
- 24
- 25
- 26
- 27
- 28
- 29
- 30
- 31
- 32
- 33
- 34
- 35
- 36
- 37
- 38
- 39
- 40
- 41
- 42
- 43
- 44
- 45
- 46
- 47
- 48
- 49
- 50
- 51
- 52
- 53
- 54
- 55
- 56
- 57
- 58
- 59
- 60
- 23: 23, there will be no auditing process by independent investigators.
  - 30: 15, CBT intervention will be made available for control group after the end of the study. The SPIRIT Explanation and Elaboration paper is distributed under the terms of the Creative Commons Attribution License CC-BY-NC. This checklist was completed on 15. February 2021 using <https://www.goodreports.org/>, a tool made by the [EQUATOR Network](#) in collaboration with [Penelope.ai](#)

# BMJ Open

## Relapse prevention group therapy via video-conferencing for substance use disorder: protocol for a multicentre randomised controlled trial in Indonesia

|                                 |                                                                                                                                                                                                                                                                                                                                                                                                                                                                                                                                                                                                                                                                                                                                                                                                                                                                                                                                                                                                                                                        |
|---------------------------------|--------------------------------------------------------------------------------------------------------------------------------------------------------------------------------------------------------------------------------------------------------------------------------------------------------------------------------------------------------------------------------------------------------------------------------------------------------------------------------------------------------------------------------------------------------------------------------------------------------------------------------------------------------------------------------------------------------------------------------------------------------------------------------------------------------------------------------------------------------------------------------------------------------------------------------------------------------------------------------------------------------------------------------------------------------|
| Journal:                        | <i>BMJ Open</i>                                                                                                                                                                                                                                                                                                                                                                                                                                                                                                                                                                                                                                                                                                                                                                                                                                                                                                                                                                                                                                        |
| Manuscript ID                   | bmjopen-2021-050259.R1                                                                                                                                                                                                                                                                                                                                                                                                                                                                                                                                                                                                                                                                                                                                                                                                                                                                                                                                                                                                                                 |
| Article Type:                   | Protocol                                                                                                                                                                                                                                                                                                                                                                                                                                                                                                                                                                                                                                                                                                                                                                                                                                                                                                                                                                                                                                               |
| Date Submitted by the Author:   | 22-Jun-2021                                                                                                                                                                                                                                                                                                                                                                                                                                                                                                                                                                                                                                                                                                                                                                                                                                                                                                                                                                                                                                            |
| Complete List of Authors:       | <p>Yamada, Chika; Kyoto University, Department of Environmental Coexistence, Center for Southeast Asian Studies</p> <p>Siste, Kristiana; Universitas Indonesia, Department of Psychiatry, Faculty of Medicine</p> <p>Hanafi, Enjeline; Universitas Indonesia, Department of Psychiatry, Faculty of Medicine,</p> <p>Ophinni, Youdiil; Ragon Institute</p> <p>Beatrice, Evania; Universitas Indonesia, Department of Psychiatry, Faculty of Medicine</p> <p>Rafelia, Vania; Universitas Indonesia, Department of Psychiatry, Faculty of Medicine</p> <p>Alison, Peter; Universitas Indonesia, Department of Psychiatry, Faculty of Medicine</p> <p>Prabowo, Albert; Universitas Indonesia, Department of Psychiatry, Faculty of Medicine</p> <p>Shinozaki, Tomohiro; Tokyo University of Science, Department of Information and Computer Technology</p> <p>Matsumoto, Toshihiko; NCNP, Department of Drug Dependence Research</p> <p>Sakamoto, Ryota; Kyoto University, Department of Environmental Coexistence, Center for Southeast Asian Studies</p> |
| <b>Primary Subject Heading</b>: | Addiction                                                                                                                                                                                                                                                                                                                                                                                                                                                                                                                                                                                                                                                                                                                                                                                                                                                                                                                                                                                                                                              |
| Secondary Subject Heading:      | Addiction, Global health, Mental health, Evidence based practice                                                                                                                                                                                                                                                                                                                                                                                                                                                                                                                                                                                                                                                                                                                                                                                                                                                                                                                                                                                       |
| Keywords:                       | Substance misuse < PSYCHIATRY, Telemedicine < BIOTECHNOLOGY & BIOINFORMATICS, PSYCHIATRY, Clinical trials < THERAPEUTICS                                                                                                                                                                                                                                                                                                                                                                                                                                                                                                                                                                                                                                                                                                                                                                                                                                                                                                                               |
|                                 |                                                                                                                                                                                                                                                                                                                                                                                                                                                                                                                                                                                                                                                                                                                                                                                                                                                                                                                                                                                                                                                        |

SCHOLARONE™  
Manuscripts



I, the Submitting Author has the right to grant and does grant on behalf of all authors of the Work (as defined in the below author licence), an exclusive licence and/or a non-exclusive licence for contributions from authors who are: i) UK Crown employees; ii) where BMJ has agreed a CC-BY licence shall apply, and/or iii) in accordance with the terms applicable for US Federal Government officers or employees acting as part of their official duties; on a worldwide, perpetual, irrevocable, royalty-free basis to BMJ Publishing Group Ltd ("BMJ") its licensees and where the relevant Journal is co-owned by BMJ to the co-owners of the Journal, to publish the Work in this journal and any other BMJ products and to exploit all rights, as set out in our [licence](#).

The Submitting Author accepts and understands that any supply made under these terms is made by BMJ to the Submitting Author unless you are acting as an employee on behalf of your employer or a postgraduate student of an affiliated institution which is paying any applicable article publishing charge ("APC") for Open Access articles. Where the Submitting Author wishes to make the Work available on an Open Access basis (and intends to pay the relevant APC), the terms of reuse of such Open Access shall be governed by a Creative Commons licence – details of these licences and which [Creative Commons](#) licence will apply to this Work are set out in our licence referred to above.

Other than as permitted in any relevant BMJ Author's Self Archiving Policies, I confirm this Work has not been accepted for publication elsewhere, is not being considered for publication elsewhere and does not duplicate material already published. I confirm all authors consent to publication of this Work and authorise the granting of this licence.



1  
2  
3 **1 Title**  
4

5 2 Relapse prevention group therapy via video-conferencing for substance use disorder: protocol for  
6  
7  
8 3 a multicentre randomised controlled trial in Indonesia  
9

10 4  
11  
12 **5 Author names and affiliations**  
13

14 6 Chika Yamada <sup>1\*</sup>, Kristiana Siste <sup>2\*</sup>, Enjeline Hanafi <sup>2\*</sup>, Youdiil Ophinni <sup>3\*</sup>, Evania Beatrice <sup>2</sup>,  
15  
16  
17 7 Vania Rafelia <sup>2</sup>, Peter Alison <sup>2</sup>, Albert Prabowo <sup>2</sup>, Tomohiro Shinozaki <sup>4</sup>, Toshihiko Matsumoto <sup>5</sup>,  
18  
19 8 Ryota Sakamoto <sup>1</sup>  
20

21 9  
22  
23  
24 10 <sup>1</sup> Department of Environmental Coexistence, Center for Southeast Asian Studies, Kyoto  
25  
26 11 University, Kyoto, Japan

27  
28 12 <sup>2</sup> Department of Psychiatry, Faculty of Medicine, Universitas Indonesia, Jakarta, Indonesia  
29

30  
31 13 <sup>3</sup> Ragon Institute of MGH, MIT and Harvard, Cambridge, USA  
32

33 14 <sup>4</sup> Department of Information and Computer Technology, Faculty of Engineering, Tokyo  
34  
35 15 University of Science, Tokyo, Japan  
36

37  
38 16 <sup>5</sup> Department of Drug Dependence Research, National Center of Neurology and Psychiatry,  
39  
40 17 Tokyo, Japan  
41

42 18 \*These authors contributed equally to this work.  
43  
44

45 19

46  
47 **20 E-mail address**  
48

49 21 Chika Yamada: [chika128@cseas.kyoto-u.ac.jp](mailto:chika128@cseas.kyoto-u.ac.jp)  
50

51 22 Kristiana Siste: [ksiste@yahoo.com](mailto:ksiste@yahoo.com)  
52

53  
54 23 Enjeline Hanafi: [enjelinehanafi@gmail.com](mailto:enjelinehanafi@gmail.com)  
55  
56  
57  
58  
59  
60

1  
2  
3 24 Youdiil Ophinni: yophinni@mgh.harvard.edu  
4

5 25 Albert Prabowo: albert.lorenz@yahoo.com  
6

7 26 Evania Beatrice: btricevania@gmail.com  
8

9  
10 27 Vania Rafelia: vaniarafelia@gmail.com  
11

12 28 Peter Alison: p\_ter\_alison@hotmail.com  
13

14 29 Tomohiro Shinozaki: shinozaki@rs.tus.ac.jp  
15

16 30 Toshihiko Matsumoto: tmatsu@ncnp.go.jp  
17

18 31 Ryota Sakamoto: sakamoto65@cseas.kyoto-u.ac.jp  
19  
20  
21  
22  
23

24 33 **Corresponding author**

25  
26 34 Chika Yamada  
27

28 35 E-mail address: chika128@cseas.kyoto-u.ac.jp  
29

30 36 Postal address: 46 Yoshidashimoadachicho, Sakyo Ward, Kyoto, 606-8304, Japan  
31  
32  
33  
34

35 38 Abstract: 261 words  
36

37 39 Main text: 5,598 words  
38  
39  
40  
41  
42  
43  
44  
45  
46  
47  
48  
49  
50  
51  
52  
53  
54  
55  
56  
57  
58  
59  
60

## 40 Abstract

41 **Background:** Substance use disorder (SUD) is a leading contributor to the global burden of  
42 disease. In Indonesia, formal treatment availability falls below the targeted coverage for people  
43 with SUD needing care. A standardised and scalable therapeutic option for SUD with potential for  
44 widespread implementation is needed, yet evidence-based data in the country is scarce. Here, we  
45 developed a cognitive behavioural therapy (CBT)-based group telemedicine model and proposed  
46 to investigate the effectiveness and implementability for providers, in a multicentre randomised  
47 controlled trial (RCT).

48 **Methods:** Participants will be recruited from the communities across Indonesia. Recruitment will  
49 be done through the social networks of eight sites: three hospitals, two primary healthcare centres,  
50 and three rehabilitation centres. The intervention is a relapse prevention program called Indo-  
51 DARPP, a newly-developed 12-week module based on CBT and motivational interviewing  
52 constructed in the Indonesian context. The program is delivered by healthcare providers and peer  
53 counsellors in a group therapy via video-conferencing—intervention will be given in addition to  
54 treatment as usual. Control comparison is treatment as usual only. A total of 220 participants will  
55 be randomly divided by half into the intervention and control group. The primary outcome is the  
56 increase of percent days of abstinence from the primarily used substance in the past 28 days.  
57 Secondary outcomes include addiction severity, quality of life, motivation to change, psychiatric  
58 symptoms, cognitive function, coping, and internalised stigma. Assessments will be done at  
59 baseline (week 0), post-treatment (week 13), three, and twelve months after the treatment  
60 completion (week 24 and 60). Retention, participant satisfaction, and cost-effectiveness will be  
61 assessed as implementation outcomes.

1  
2  
3 62 **Ethics and dissemination:** The study protocol was reviewed and approved by the Ethics  
4  
5 63 Committees in Universitas Indonesia and Kyoto University. Results will be disseminated into  
6  
7 64 academic journals and international conferences. Provided positive outcomes, the treatment  
8  
9 65 program will be advocated to the Indonesian government for adoption as a formal healthcare-based  
10  
11 66 approach for SUD..  
12  
13

14  
15 67 **Trial registration number:** UMIN000042186  
16

17  
18 68 **Keywords:** *substance use disorder, telemedicine, cognitive behavioural therapy, relapse*  
19  
20 69 *prevention, motivational interviewing, Indonesia, peer counsellor*  
21  
22

23 70  
24  
25  
26  
27  
28  
29  
30  
31  
32  
33  
34  
35  
36  
37  
38  
39  
40  
41  
42  
43  
44  
45  
46  
47  
48  
49  
50  
51  
52  
53  
54  
55  
56  
57  
58  
59  
60

1  
2  
3 71 **Strengths and limitations of this study**  
4  
5

- 6 72 ● The proposed study will be the first to establish high-quality evidence for a cognitive  
7  
8 73 behavioural therapy (CBT)-based relapse prevention program for substance use disorder  
9  
10 74 (SUD) in Indonesia.  
11  
12  
13 75 ● Telemedicine enables far-reaching nationwide participation, connecting participants with  
14  
15 76 providers in major cities, which in this study will include providers from three different  
16  
17 77 levels of health care: tertiary hospitals, primary healthcare centres, and rehabilitation  
18  
19 78 centres.  
20  
21  
22 79 ● A successful outcome may produce a new SUD treatment module in Indonesia and pave  
23  
24 80 the way for adoption into the national guideline.  
25  
26  
27 81 ● Study limitations include risk of recall and social desirability bias, heterogeneous control  
28  
29 82 condition, and possible variability in treatment provision.  
30

31 83  
32  
33  
34  
35  
36  
37  
38  
39  
40  
41  
42  
43  
44  
45  
46  
47  
48  
49  
50  
51  
52  
53  
54  
55  
56  
57  
58  
59  
60

## 84 Introduction

85 Substance use disorder (SUD) is a condition characterised by the inability to control the  
86 use of psychoactive substances, i.e., alcohol and psychotropic drugs, which disrupts daily living.  
87 SUD remains a major and growing health problem worldwide. According to the Global Burden of  
88 Disease (GBD) survey in 2016, SUD globally contributes to 131 million disability-adjusted life  
89 years (DALY), or 5.5% of all DALYs,<sup>1</sup> and this number has been increasing since the 1990s.<sup>2</sup>  
90 While substance use itself is more widespread in high-income countries (HICs), low- and middle-  
91 income countries (LMICs) are disproportionately burdened. Absolute mortality rate due to SUD  
92 was greatest in LMICs with large populations,<sup>3</sup> and people with economic disadvantage are more  
93 likely to develop SUD.<sup>4</sup> The Movement for Global Mental Health and the World Health  
94 Organization both have described substantial treatment gaps in LMICs, where the number of  
95 people with SUD in need of health care far exceeds the availability of formal treatment services.<sup>5-7</sup>  
96 While this does not take traditional care into account, indeed, merely 1% of people with SUD in  
97 LMICs received treatment standardised by the government.<sup>8</sup>

98 In Indonesia, the world's third most populous LMIC, the national SUD prevalence was  
99 estimated by the national government at 1.8% or 3.3 million people, with the most used substance  
100 being marijuana (68%), followed by amphetamine-type stimulants (ATS, 42%), opioids (38%)  
101 and sedatives (35%).<sup>9,10</sup> Its strategic intercontinental location contributes to the country's infamous  
102 reputation as a marijuana exporter and drug trafficking hub.<sup>11</sup> While there is an 80% decrease of  
103 injecting drug use (IDU) from 2002 to 2016,<sup>10</sup> an increasing use of psychoactive medications out  
104 of prescription has been noted, particularly benzodiazepines.<sup>12</sup> Similar to other Muslim majority  
105 countries,<sup>13</sup> alcohol consumption is comparatively low in Indonesia—prevalence estimate of  
106 alcohol use disorder was 0.8% in 2016, much lower than the overall rate in Southeast Asia

1  
2  
3 107 (3.9%).<sup>14</sup> New psychoactive substances (NPS) has also entered the country in the last decade.<sup>15</sup>  
4  
5 108 The current COVID-19 pandemic may also further complicate the SUD situation in Indonesia, as  
6  
7 109 observed elsewhere.<sup>16</sup> In unpublished data from our co-author (KS), since the start of pandemic in  
8  
9 110 early April 2020, there has been an increase in both drug and alcohol use in Indonesia of up to  
10  
11 111 2.5%. Higher drug use might be influenced by lockdown isolation, socio-economic issues due to  
12  
13 112 unemployment, and heavier mental burden.  
14  
15

16  
17 113 In Indonesia, formal mental health providers and facilities are severely lacking; in a nation  
18  
19 114 of 267 million people, only 773 psychiatrists (0.32 per 100,000 people) are employed—second  
20  
21 115 lowest in Southeast Asia<sup>17</sup>—across hospitals with psychiatric care, half of which are located within  
22  
23 116 the capital island of Java.<sup>18</sup> In terms of government-run primary healthcare centres (abbreviated as  
24  
25 117 *Puskesmas* in Indonesian), out of all *Puskesmas* (~1,700 nationwide), only a fifth actively provide  
26  
27 118 mental health care.<sup>18,19</sup> Current formal treatment options for SUD include one-on-one supportive  
28  
29 119 psychotherapy, symptomatic pharmacotherapy, peer counselling, and opioid substitution.  
30  
31 120 Methadone maintenance therapy (MMT) is available in *Puskesmas* since 2006, but coverage  
32  
33 121 remains low: only 5% in a 2012 study<sup>20</sup> due to methadone cost, reliance on subsidisation, lack of  
34  
35 122 program sustainability,<sup>21</sup> and the tendency to incarcerate patients under the 'war on drugs'  
36  
37 123 policy.<sup>20,22</sup> Three-months retention rate of MMT was only 60-74%.<sup>23,24</sup> Psychiatric comorbidities  
38  
39 124 were also common in MMT users and quality of life was evidently lower.<sup>25</sup> Most concerning,  
40  
41 125 insufficient formal treatment coverage and the lack of standardised care for SUD prompted  
42  
43 126 policymakers to enact punitive criminalization practices—even more evident by the current  
44  
45 127 Indonesian administration—in place of a comprehensive mental health care approach.<sup>26,27</sup>  
46  
47  
48  
49  
50

51  
52 128 Behavioural therapies in many forms are commonly applied for SUD, most popular of  
53  
54 129 which is cognitive behavioural therapy (CBT). Strong evidence backs the efficacy of CBT for  
55  
56  
57  
58  
59  
60

1  
2  
3 130 SUD treatment. A meta-analysis gave a moderate overall effect size ( $d = 0.45$ ), with outcomes  
4  
5 131 ranging from the self-report abstinence, drug-free urine at treatment exit, to increased retention in  
6  
7 132 therapy.<sup>28,29</sup> CBT strategies include: (a) contingency management (CM)<sup>30</sup> which introduces reward  
8  
9 133 for abstinence, (b) motivational interviewing (MI) which explores and resolves ambivalence,<sup>31,32</sup>  
10  
11 134 (c) relapse prevention (RP) which helps participants to identify high-risk triggers and prevent  
12  
13 135 craving, or (d) combinations thereof.<sup>33</sup> Therapy could be delivered individually or in groups; the  
14  
15 136 latter evidently increased adherence and self-disclosure, as well as decreased the time needed by  
16  
17 137 providers to treat a participant by 40%.<sup>34,35</sup> CBT (particularly MI and RP) is relatively low-cost  
18  
19 138 and can be delivered by non-specialists, making it beneficial in resource-limited settings.<sup>36,37</sup> In  
20  
21 139 regard to LMICs, while an ample amount of RCTs have supported CBT efficacy to reduce alcohol  
22  
23 140 use,<sup>38,39</sup> evidence for drug use disorders is limited. Only five RCTs have been published so far,<sup>40–</sup>  
24  
25 141 <sup>44</sup> in which three of them were inpatient-based, even though SUD management mandates  
26  
27 142 sustainable outpatient care in community settings.

28  
29  
30  
31  
32  
33 143 Telemedicine has the potential to elevate SUD treatment coverage in Indonesia. Internet  
34  
35 144 communication overcomes the geographical barriers of the Indonesian archipelago, and saves time  
36  
37 145 as well as transportation cost for both patients and providers, either in remote areas where health  
38  
39 146 services are thinly spread,<sup>45</sup> or major cities with heavy traffic such as Jakarta.<sup>46</sup> Privacy is better  
40  
41 147 ensured; visiting clinics may disclose SUD diagnosis, which is one of the most stigmatised health  
42  
43 148 conditions.<sup>47</sup> Synchronous telemedicine via live video feed connects participants in real-time,  
44  
45 149 improving rapport and potentially adherence, relative to asynchronous telemedicine (e.g., text  
46  
47 150 message or web application). Video-conferencing has been effectively used in SUD treatment,<sup>48–</sup>  
48  
49 151 <sup>53</sup> but recent systematic reviews<sup>54–59</sup> have revealed three lacking points: (1) previous reports merely  
50  
51 152 focused on alcohol and opioid use,<sup>48,51–53</sup> (2) group therapy was investigated by only one small-



1  
2  
3 153 scale pilot RCT,<sup>52</sup> and (3) no studies were done in LMICs. The use of internet devices has been  
4  
5 154 rapidly expanding in LMICs, including Indonesia. Smartphone users accounted for 74% of the  
6  
7  
8 155 Indonesian population in 2019, possibly reaching 89% by 2025.<sup>60</sup> Furthermore, the COVID-19  
9  
10 156 pandemic has elevated telemedicine from an accessory to a necessity, including for psychiatric  
11  
12 157 care.<sup>61</sup> Its accessibility and acceptance among SUD patients, as shown in a recent survey,<sup>62</sup> may  
13  
14  
15 158 potentially sustain telemedicine as the 'new normal' even in the post-pandemic world.<sup>63,64</sup>  
16

17 159 Given the above challenges and opportunities, we propose a clinical trial to evaluate a  
18  
19  
20 160 relapse prevention telemedicine program for SUD in Indonesia. We have developed a new  
21  
22 161 treatment module called *Indonesia Drug Addiction Relapse Prevention Program* (Indo-DARPP),  
23  
24 162 which is a 12-week CBT-based group therapy. The primary objective is to evaluate the  
25  
26  
27 163 effectiveness of Indo-DARPP delivered via video conference (tele-Indo-DARPP), added to  
28  
29 164 treatment as usual (TAU), to increase abstinence from primarily-used substances, compared to  
30  
31 165 TAU only. Secondary objectives are to assess the effectiveness of the program toward changes in  
32  
33  
34 166 quality of life, motivation to change, psychological symptoms, cognitive function, coping, and  
35  
36 167 internalised stigma. Retention, participant satisfaction, and group cohesion will be assessed as  
37  
38 168 implementation outcomes, and cost-effectiveness analyses will be conducted to inform health  
39  
40 169 policy investment.  
41  
42

43 170

## 46 171 **METHODS**

### 49 172 **Trial design**

51  
52 173 This trial is a parallel-group, two-arm, assessor-blinded, multicentre superiority  
53  
54 174 randomised controlled trial. The protocol adheres to the Standard Protocol Items:  
55  
56  
57  
58  
59

1  
2  
3 175 Recommendations for Interventional Trials (SPIRIT) checklist (**Supplementary file 1**). We  
4  
5 176 design the study as a pragmatic type 1 hybrid effectiveness-implementation trial,<sup>65</sup> which allows  
6  
7 177 concurrent investigation of intervention effectiveness as well as implementation in clinical practice,  
8  
9 178 focusing on the former. After intake screening, participants will undergo baseline assessment (T1)  
10  
11 179 and randomly allocated in a 1:1 ratio either to the intervention arm receiving tele-Indo-DARPP in  
12  
13 180 addition to TAU, or control arm receiving TAU only. Treatment will be done for 12 weeks,  
14  
15 181 followed by post-treatment assessment (T2) in week 13, and follow-up assessment (T3) in week  
16  
17 182 24 (**Figure 1**).

18  
19  
20  
21  
22 183  
23  
24  
25 184 [Figure 1 approximately here.]  
26  
27  
28 185

## 29 30 186 **Participants and settings**

31  
32  
33 187 Participants will be recruited from the community across Indonesia via social networks of  
34  
35 188 eight sites: two primary health centres (Puskesmas), three referral hospitals, and three drug  
36  
37 189 rehabilitation services (**Table 1**). These facility types constitute the community-based treatment  
38  
39 190 model for SUD in Indonesia,<sup>66</sup> encompassing patients with various characteristics in motivation  
40  
41 191 for behavioural change, substance use history, comorbidities, and current stage in treatment.  
42  
43 192 Recruitment will be done via online advertisement (i.e., social networking services, group chat,  
44  
45 193 website) and direct approach to current and former clients through outpatient services, in a  
46  
47 194 consecutive sampling. Although all facilities are located in urban settings, the recruitment process  
48  
49 195 will include online social media of each site, whose coverage is nationwide particularly for the  
50  
51  
52  
53  
54  
55  
56  
57  
58  
59  
60

1  
2  
3 196 rehabilitation centers, and we expect recruitment of participants from anywhere in Indonesia and  
4  
5 197 not limited to the physical scope of each site.  
6  
7

8 198 Puskesmas provides general primary care, pharmacotherapy for cases without any  
9  
10 199 complications, and MMT. Referral hospitals provide psychotherapy, pharmacotherapy, opioid  
11  
12 200 substitution therapy using buprenorphine/naloxone, and specialised care for cases with  
13  
14 201 complications, such as severe psychiatric disorder. Rehabilitation services provide long-term  
15  
16 202 psychosocial care, typically in a mutual-aid group form. Selection of sites was based on feasibility,  
17  
18 203 client demographic, recruitment potential, and availability of providers. While recruited  
19  
20 204 participants may not be under treatment in the aforementioned sites at the time, facilitators for tele-  
21  
22 205 Indo-DARPP will be the staff of respective sites: general practitioners in Puskesmas, psychiatrists  
23  
24 206 in referral hospitals, and counsellors in rehabilitation centres.  
25  
26  
27  
28

29 207

30  
31  
32 208 [Table 1 approximately here.]  
33  
34

35 209

36  
37  
38 210 Inclusion criteria will be those who: 1) aged 18-65 years old; 2) are diagnosed as having  
39  
40 211 substance use disorder based on DSM-5; 3) have used primarily-used substance for at least one  
41  
42 212 day in the past one year; 4) have access to electronic devices (i.e., smartphone, mobile tablet,  
43  
44 213 personal computer) with internet connection; and 5) are proficient in Indonesian. Exclusion criteria  
45  
46 214 will be those who: 1) have severe comorbidity that hinder informed consent or group therapy  
47  
48 215 participation; and 2) currently hospitalised or are using residential care.  
49  
50

51  
52 216 We set a broad inclusion criteria, i.e. substance use in the past one year, for two reasons.  
53  
54 217 First, proportional hazard models showed that the probability of relapse remains high before  
55  
56  
57  
58  
59  
60

1  
2  
3 218 achieving one year of abstinence, and only declined substantially after 16 months<sup>67,68</sup>. Thus, it is  
4  
5 219 clinically important to examine treatment efficacy on people who have not achieved one-year  
6  
7  
8 220 abstinence.<sup>68</sup> Second, in this pragmatic effectiveness study,<sup>69</sup> we design eligibility criteria to more  
9  
10 221 closely represent a population seen in real-world Indonesian clinical practice. Indeed, patients  
11  
12 222 treated at the collaborating clinical sites include people who have been abstinent for more than one  
13  
14  
15 223 month, but still experience cravings and tendency to relapse.  
16  
17 224  
18  
19

## 20 225 **Recruitment**

21  
22 226 Patients eligibility will be assessed by collaborating staff at respective sites. For those who  
23  
24 227 have never been diagnosed as having SUD, addiction psychiatrists will conduct clinical  
25  
26 228 assessments via video call. Oral and written informed consent will be given to those eligible. The  
27  
28 229 consent form in English is provided in **Supplementary file 2**. For urine tests, explanations will be  
29  
30 230 given immediately after post-treatment (T2) assessment, as anticipation for urine tests may  
31  
32 231 influence substance use behaviour. Consent to urine test or absence thereof will not affect study  
33  
34  
35 232 participation.  
36  
37  
38  
39 233

## 40 234 **Randomisation and blinding**

41  
42 235 Participants will be randomly allocated to either an intervention (tele-Indo-DARPP +  
43  
44 236 TAU) or a control (TAU only) arm, with stratification by study site. Each site will conduct two  
45  
46 237 waves of recruitment with 10 participants in each wave. After the first wave at each site, we will  
47  
48 238 randomly allocate 5 participants to either intervention or control group. All participants in a given  
49  
50 239 tele-Indo-DARPP group will be from the same recruitment site. Recruitment will be continued  
51  
52  
53  
54  
55  
56  
57  
58  
59  
60

1  
2  
3 240 until another 10 participants (second wave) joined, and random allocation will be done similarly.  
4  
5 241 Allocation will be done using computer-generated random numbers by a researcher who will be  
6  
7 242 blinded to participants' information, except for ID. Data will be collected by researchers who are  
8  
9 243 blinded to the allocation arm of each participant. Participants and treatment providers are not  
10  
11 244 blinded as the intervention is a psychotherapy.  
12  
13  
14  
15 245

### 18 246 **Development of Indo-DARPP**

19  
20  
21 247 Indo-DARPP was based on the Serigaya Methamphetamine Relapse Prevention Program  
22  
23 248 (SMARPP), a face-to-face group CBT-based intervention in Japan developed by a co-author  
24  
25 249 (TM),<sup>70</sup> which itself is based on the Matrix Model developed in the US.<sup>71</sup> Efficacy of SMARPP in  
26  
27 250 increasing abstinence duration, motivation to change, and participation in self-help groups have  
28  
29 251 been reported.<sup>72-74</sup> SMARPP has been widely implemented as a psychotherapy for SUD not only  
30  
31 252 in psychiatric clinics but also primary healthcare, rehabilitation, and probation offices in Japan,  
32  
33 253 covered by the national insurance scheme. SMARPP has excellent scalability via the use of a  
34  
35 254 workbook, and can be delivered by non-specialists who have received a brief training.  
36  
37  
38

39  
40 255 Contents of Indo-DARPP are based on the RP model, where participants are guided to  
41  
42 256 learn high-risk situations for substance use and coping strategies. The program also incorporates  
43  
44 257 elements of MI and psychoeducation on substances, SUD, and its common comorbidities. While  
45  
46 258 CM could also be added, it increases cost and may not be effective in the longer term,<sup>75</sup> and thus,  
47  
48 259 MI and RP approaches will be utilised in this study. Adaptations from SMARPP were done via  
49  
50 260 focus group discussions involving Japanese researchers, Indonesia-based psychiatrists, general  
51  
52 261 practitioners, and peer counsellors, all of whom have extensive experience ranging 4-20 years in  
53  
54 262 the addiction field. Substances discussed in the module are amphetamine-type stimulants,  
55  
56  
57  
58  
59

1  
2  
3 263 benzodiazepines and other prescribed medicines, opioids, marijuana, NPS, and alcohol. Indo-  
4  
5 264 DARPP is designed to be delivered in a small group format using a workbook (see **Supplementary**  
6  
7  
8 265 **file 3** for table of contents of the workbook), and sessions will be provided by one facilitator and  
9  
10 266 one co-facilitator who is a peer counsellor with lived experiences of SUD.

11  
12  
13 267 A pilot test was held at Site 1, recruiting nine SUD patients into a 12-week tele-Indo-  
14  
15 268 DARPP, to check the content acceptability and feasibility of the online delivery format. Further  
16  
17 269 adjustments were made based on the pilot results and patient feedback.

20 270

### 23 271 **Intervention via video conference: tele-Indo-DARPP**

24  
25  
26 272 Tele-Indo-DARPP will be implemented in group therapy with a maximum of five patients, in  
27  
28 273 a weekly 2-hour session for 12 weeks, delivered using the online video-conferencing application  
29  
30 274 Zoom. URLs for video conferences will be informed weekly by the research team to five Indo-  
31  
32 275 DARPP participants and two providers via online group chat for participants who agreed to share  
33  
34 276 their contacts. Those who declined to share will be notified via personal messages. Each Indo-  
35  
36 277 DARPP session consists of three parts: (1) "check-in", where participants share history of  
37  
38 278 substance use and craving in the past week, and analyse high-risk situations and coping actions  
39  
40 279 taken; (2) "today's topic", where providers guide discussion of specific workbook chapters and  
41  
42 280 participants fill in exercises, and (3) "check-out", where providers give summary and invite  
43  
44 281 feedback, and participants anticipate triggers and coping strategies for the following week.

49 282

### 52 283 **Providers of tele-Indo-DARPP**

1  
2  
3 284 At least two persons from each site will serve as facilitators, who meet the following criteria:  
4  
5 285 psychiatrist with at least 1-year experience in treating SUD patients, or healthcare provider with  
6  
7 286 at least 2-year experience in providing care for SUD patients, or peer counsellor with at least 2-  
8  
9 287 year involvement in any organisation providing services for people with SUD. The roles of  
10  
11 288 facilitators are to (1) lead and moderate Indo-DARPP sessions, (2) elaborate on chapter contents,  
12  
13 289 (3) manage participants to follow rules, (4) establish safe and warm environment, (5) provide  
14  
15 290 consultation including out-of-session, and (6) contact absent participants to encourage attendance.  
16  
17  
18  
19

20 291 Similarly, at least two persons from each site will serve as co-facilitators for the tele-Indo-  
21  
22 292 DARPP, described as peer counsellors who have also experienced SUD and recovered, with at  
23  
24 293 least 6-month involvement in any organisations providing services for people with SUD. The role  
25  
26 294 of co-facilitator is to (1) share personal experiences relevant to discussion topics, (2) assist  
27  
28 295 facilitators in ensuring a safe and warm environment, (3) provide general support to the Indo-  
29  
30 296 DARPP process, and (4) provide counsel, including out-of-session.  
31  
32  
33

34 297

### 37 298 **Training and supervision**

38  
39 299 Prior to recruitment, all providers will receive two full-day training online sessions on basic  
40  
41 300 knowledge of SUD treatment, Indo-DARPP contents, video demonstration, hands-on role play,  
42  
43 301 discussion on difficult cases, tele-Indo-DARPP, and study-related quality control. Workbooks and  
44  
45 302 manuals were handed to all providers, and close communication with the research team will be  
46  
47 303 kept via WhatsApp group chat throughout the research period. To maintain treatment fidelity and  
48  
49 304 quality control, during actual tele-Indo-DARPP sessions, addiction psychiatrists from the research  
50  
51 305 team (KS and EH) will randomly select and observe at least two sessions per Indo-DARPP group,  
52  
53  
54  
55  
56  
57  
58  
59

1  
2  
3 306 meaning at each wave at each site thus constituting 16.7% of the all sessions, and review the  
4  
5 307 providers using a structured checklist.  
6  
7

8 308  
9

### 10 309 **Control condition**

11  
12  
13  
14 310 Participants who received treatment before the study will continue to receive treatment as  
15  
16 311 usual, regardless of group allocation. TAU was chosen as the control condition because the Indo-  
17  
18 312 DARPP is expected to complement the existing treatment services for SUD in every level of care.  
19  
20 313 TAU differs according to the service location (**Table 1**). Individual psychotherapy is typically  
21  
22 314 conducted via in-person short consultation (~15 minutes) with clinical psychiatrists.  
23  
24 315 Pharmacotherapy is given to alleviate symptoms, e.g., anxiolytics for anxiety. Patients undergoing  
25  
26 316 MMT visit the site almost every day to receive their daily doses, while patients undergoing  
27  
28 317 substitution therapy with buprenorphine with naloxone visit every week. All participants will be  
29  
30 318 able to continue any outpatient pharmacological treatment (e.g., MMT, antidepressants) and  
31  
32 319 psychotherapy (e.g., twelve-step group sessions).  
33  
34  
35  
36

37 320  
38  
39

### 40 321 **Primary outcome**

#### 41 42 322 **Abstinence from primarily used substance**

43  
44  
45 323 The primary outcome is the percent days of abstinence from the primarily used substance  
46  
47 324 during the past 28 days. Percent days of abstinence has been shown to be sensitive to the effects  
48  
49 325 of CBT and are good predictors of SUD treatment follow-up.<sup>76</sup> Use of primarily used substance  
50  
51 326 each day (yes/no) for 28 days will be retrospectively interviewed on a weekly-basis using the  
52  
53 327 timeline followback (TLFB) method (**Table 2**), which has good validity and high test-retest  
54  
55  
56  
57  
58  
59



1  
2  
3 328 reliability in measuring substance consumption.<sup>77,78</sup> The participants will be asked to recount every  
4  
5 329 week, to reduce the risk of recall bias. The primarily used substance is defined as the substance  
6  
7 330 causing the most problems for participants and drives them to seek care, at T1.

8  
9  
10 331 We will collect urine samples to test the presence of the primarily used substance once at  
11  
12 332 T2. Thresholds for a positive result are >100 ng/ml for ethyl glucuronide (for alcohol use), >300  
13  
14 333 ng/ml for amphetamine-type stimulant (i.e., d-methamphetamine and MDMA), >100 ng/ml for  
15  
16 334 diacetyl morphine (heroin), cocaine, and benzodiazepine, >50 ng/ml for synthetic cannabis (K2),  
17  
18 335 and > 25 ng/ml for tetrahydrocannabinol (marijuana). Urine tests in this study will only serve to  
19  
20 336 corroborate the data of self-reported substance use at the primary endpoint (T2), and not as an  
21  
22 337 objective surrogate of all self-reported substance use data at every time point. This was planned to  
23  
24 338 improve feasibility for participants and minimise drop-out due to the burden of data collection  
25  
26 339 (urine test needs in-person assessment, unlike all other measurements in this study), especially  
27  
28 340 among participants who reside in remote areas deemed most benefited from online therapy.  
29  
30  
31  
32

33 341

34  
35 342 [Table 2 approximately here.]  
36  
37

38 343

## 39 344 **Secondary outcomes**

### 40 345 *Addiction severity*

41  
42 346 The Addiction Severity Index (ASI) is the most widely used measure in the field of  
43  
44 347 addiction.<sup>79</sup> Internal consistency, test-retest reliability, and scale independence of ASI to measure  
45  
46 348 substance use have long been established.<sup>80,81</sup> The Treatnet ASI version 3.0 by the United Nations  
47  
48 349 Office on Drugs and Crime (UNODC) will be used; the scale is available in Indonesian, and one  
49  
50 350 addiction treatment centre in Indonesia was included in its development trial.<sup>82</sup>  
51  
52  
53  
54  
55  
56  
57  
58  
59

1  
2  
3 351 ***Health-related quality of life***  
4

5 352 The five-level version of the five-dimensional EuroQoL (EQ-5D)<sup>83,84</sup> will be used to assess  
6  
7  
8 353 health-related quality of life (HRQoL), which has been done before among SUD patients with  
9  
10 354 confirmed construct validity.<sup>85,86</sup> The total utility score will be obtained using the already  
11  
12 355 established value set in Indonesia.<sup>87</sup>  
13

14  
15 356 ***Motivation to change***  
16

17 357 Motivation to change will be assessed by the Action subscale the University of Rhode  
18  
19 358 Island Change Assessment (URICA).<sup>88</sup> URICA has been shown to have good validity, where  
20  
21 359 higher scores indicate that the person has committed to develop positive behavioural changes  
22  
23 360 (Diclemente and County, 2000; Diclemente et al., 2004).<sup>89</sup>  
24  
25

26 361 ***Coping***  
27

28 362 Types of engaged stress coping will be assessed by the Brief Coping Orientations to  
29  
30 363 Problems Experienced (Brief COPE),<sup>90</sup> which is commonly used for SUD patients.<sup>91</sup> A higher  
31  
32 364 score indicates that the person has adopted the coping type more frequently.  
33  
34

35 365 ***Psychiatric symptoms***  
36

37 366 Psychiatric symptoms will be evaluated by the Symptom Checklist 90-R (SCL-90-R).<sup>92</sup> The  
38  
39 367 Global Severity Index (GSI) will be used, which is feasible to measure psychiatric symptoms  
40  
41 368 among SUD patients.<sup>93</sup>  
42  
43

44 369 ***Cognitive function***  
45

46 370 Cognitive function will be assessed by the Rey Auditory Verbal Learning Test (RAVLT),<sup>94</sup>  
47  
48 371 which is useful to diagnose cognitive impairment as well as post-treatment improvement in SUD  
49  
50 372 patients.<sup>95,96</sup>  
51  
52

53  
54 373 ***Internalised stigma***  
55  
56  
57  
58  
59  
60

1  
2  
3 374 Internalised stigma will be assessed by the Internalized Stigma of Mental Illness (ISMI)  
4  
5 375 scale.<sup>97</sup> The term ‘mental illness’ in the statements will be replaced with ‘substance addiction.’  
6  
7

8 376

9  
10 377 **Implementation outcomes**

11  
12 378 ***Retention in treatment***

13  
14 379 Participants will be coded as ‘retained in treatment’ if they had therapeutic contacts—  
15  
16 380 including attending tele-Indo-DARPP and visiting any outpatient clinic for TAU—in at least 75%  
17  
18 381 of the planned contacts during the past 3 months.

19  
20  
21 382 ***Treatment satisfaction***

22  
23 383 Client Satisfaction Questionnaire-3 (CSQ-3)<sup>98</sup> is commonly used for treatment programs,  
24  
25 384 including for SUD.<sup>99</sup>

26  
27  
28 385 ***Group cohesion***

29  
30 386 Group Therapy Experience Scale (GTES) will be used to measure the level of group  
31  
32 387 cohesion and self-disclosure in group therapy, as implementation outcomes of tele-Indo-  
33  
34 388 DARPP.<sup>100</sup>

35  
36  
37 389 ***Indo-DARPP attendance***

38  
39 390 Attendance to each session will be recorded by the facilitator.

40  
41  
42 391 ***Cost effectiveness***

43  
44 392 Cost-effectiveness will be assessed from a patient, provider, and societal perspective. Cost  
45  
46 393 data will be calculated by multiplying the quantity of utilised resources by unit price. Data on  
47  
48 394 quantity and unit price will be obtained from within the trial, or estimated from relevant data  
49  
50 395 sources. For effectiveness data, both clinical and economic indexes will be used. The clinical index  
51  
52 396 is abstinence from primarily used substance in the past 28 days, which will be converted into  
53  
54  
55  
56  
57  
58  
59  
60

1  
2  
3 397 abstinent year. The economic index is quality-adjusted life year (QALY) calculated from the utility  
4  
5 398 score of EQ-5D.  
6

7  
8 399 ***Feedback interviews***  
9

10 400 Semi-structured interviews will be done with both participants and providers to assess the  
11  
12 401 following: satisfaction with content quality, comprehensibility, technical experience regarding  
13  
14 402 video-conferencing, comfortableness, module practicability, and participants' perception on the  
15  
16 403 credibility of providers. Interviews will be audio-recorded under the interviewees' consent.  
17  
18

19 404  
20  
21 405 **Participant characteristics**  
22

23  
24 406 The following data will be obtained via a self-administered questionnaire: age, gender,  
25  
26 407 approximate residential location, marital status, household co-habitants, ethnicity, religion, highest  
27  
28 408 education level, employment status, individual and household income, type of internet device used,  
29  
30 409 frequency of video calls in the past year, age of first drug use, primarily used substance, inpatient  
31  
32 410 history or incarceration in the past month, type of treatments received, treatment locations in the  
33  
34 411 past three months, status of current outpatient care (voluntary or involuntary, legal or non-legal),  
35  
36 412 and transportation time and cost from own residence to the outpatient location.  
37  
38

39  
40 413  
41  
42

43 414 **Data collection procedure**  
44

45 415 Researchers blinded to the treatment allocation will collect data at three different time  
46  
47 416 points: at baseline (week 0, T1), the week after the completion of treatment (week 13, T2), three  
48  
49 417 months after the completion of treatment (week 24, T3), and twelve months after the completion  
50  
51 418 of treatment (week 60, T4), using self-answered questionnaire and online one-on-one interview.  
52  
53

54  
55 419 As for the primary outcome, the participants will be asked to recall weekly using the TLFB, and  
56  
57  
58  
59

1  
2  
3 420 thus, an assessment period of approximately 4 weeks will be added after each assessment time  
4  
5 421 point. Urine specimens will be collected only at T2, at the final 2 weeks within the TLFB  
6  
7 422 assessment period. Assessment schedule is shown in **Table 2** and **Figure 2**. To facilitate honest  
8  
9 423 disclosure from participants, we will not record any Indo-DARPP video-conferencing sessions  
10  
11 424 throughout the study.  
12  
13  
14

15 425

16  
17  
18 426 [Figure 2 approximately here.]  
19

20 427

## 21 428 **Sample size**

22  
23  
24  
25  
26 429 Sample size was calculated for the primary outcome to detect a medium effect size of  $d =$   
27  
28 430 0.50, which is slightly more modest than a previous study examining the efficacy of telemedicine  
29  
30 431 for people with SUD in an LIMC ( $d = 0.59$ ).<sup>101</sup> Using  $\alpha = 0.05$  and power = 0.80, a simple t-test  
31  
32 432 requires  $n = 64$  per arm. We estimated the design effect of clustering within Indo-DARPP group,  
33  
34 433 using the formula,  $D = 1 + (m - 1) \rho$ ,<sup>102</sup> assuming intraclass correlation within Indo-DARPP  
35  
36 434 groups or  $\rho = 0.05$ , and group size or  $m = 5$ , which yielded the design effect or  $D = 1.2$ . Multiplying  
37  
38 435 the result of simple calculation by the design effect, the minimal number of participants in data  
39  
40 436 analysis was 77 per arm. Assuming attrition proportion = 30% which is more conservative than a  
41  
42 437 previous similar study (26%),<sup>103</sup> the sample size for enrolment was set as 110 per arm, or 220 in  
43  
44 438 total.  
45  
46  
47  
48  
49

50 439

## 51 440 **Statistical analysis**

1  
2  
3 441 A detailed statistical analysis plan will be developed by a statistician who is blinded to  
4  
5 442 patients' allocation, prior to data analysis. Baseline data description and main analyses will be  
6  
7  
8 443 conducted on an intention-to-treat basis, i.e., participants' data will be handled according to their  
9  
10 444 initially assigned arms, regardless of actual received treatment. Analyses will be conducted with a  
11  
12 445 significance level of 5% in the two-sided test, using Stata/SE 16.1.  
13  
14

#### 15 446 ***Consideration for correlated outcome data***

16  
17  
18 447 Correlation within sites for a control arm will be ignored, as the TAU within one site varies  
19  
20 448 per patient and some participants may not receive any treatment. For an intervention arm,  
21  
22 449 correlation within each Indo-DARPP group due to the nature of group therapy should be accounted  
23  
24 450 for. We will define a new variable termed 'clustering group identification (CID)', where the control  
25  
26 451 arm will be coded as a unique CID for each person, while the intervention arm will be coded based  
27  
28 452 on the tele-Indo-DARPP group they were in, i.e., the same CID for five participants.  
29  
30  
31

#### 32 453 ***Main analysis***

33  
34  
35 454 Primary endpoint will be set at T2. The mean of the outcome changes from T1 to T2 will  
36  
37 455 be compared between the intervention and control arms using a linear model. To investigate the  
38  
39 456 durability of the treatment effect, outcome changes from T1 to T3 and T4 will also be compared  
40  
41 457 between both arms. We will account for the aforementioned correlations by clustering data, based  
42  
43 458 on CID in the generalised estimation equations (GEE). To help interpret effect size, Cohen's *d*  
44  
45 459 between arms will be calculated.  
46  
47  
48

#### 49 460 ***Missing values***

1  
2  
3 461 A complete case analysis will be done, which will only include participants with no  
4  
5 462 missing values in the variables of interest. Sensitivity analysis for missing values will be conducted  
6  
7  
8 463 by either inverse probability weighted GEE<sup>104</sup> or multiple imputation.  
9

#### 10 464 ***Subgroup analysis***

11  
12  
13 465 The effect of intervention will be investigated by subgroups, as the observed effect may  
14  
15 466 vary depending on specific population. The participants will be divided by the types of primarily  
16  
17  
18 467 used substance, gender, previous and current utilisation of other SUD treatment, high and low  
19  
20 468 values in clinical characteristics at T1, e.g., percent days of abstinence, ASI drug use composite  
21  
22 469 score, URICA readiness score, and cognitive function. Specifically, based on previous studies  
23  
24  
25 470 which showed that treatment effectiveness varied depending on baseline severity levels<sup>105,106</sup>, we  
26  
27 471 hypothesised that participants assigned to tele-Indo-DARPP with more severe level of substance  
28  
29 472 use at T1 would report more increased abstinent days at T2, T3, and T4.  
30

#### 31 473 ***Implementation evaluation***

32  
33  
34 474 Chi-squared tests and *t*-tests will be done to compare retention in treatment and treatment  
35  
36 475 satisfaction between the arms, exclusively for participants who were already receiving SUD  
37  
38 476 treatment at T1. Group cohesion and Indo-DARPP attendance will be descriptively reported by  
39  
40 477 mean and standard deviation. For cost-effectiveness analysis, the incremental cost-effectiveness  
41  
42 478 ratios (ICERs) will be calculated, which will yield costs per QALY and abstinent year. Feedback  
43  
44 479 interviews will be transcribed and thematic analysis will be conducted.  
45  
46  
47

48 480

#### 49 50 481 **Compensations**

51  
52  
53 482 Participants in both the control and intervention groups will receive 300,000 IDR ( $\approx$  21.3  
54  
55 483 USD) to compensate for their transportation to treatment sites for TAU throughout the 12 weeks,  
56  
57  
58  
59

1  
2  
3 484 and also 98,000 IDR ( $\approx$  7.0 USD) for every time they complete an online video assessment as  
4  
5 485 compensation for internet data and 2-hour data collection. Specific to the intervention group,  
6  
7 486 participants will receive internet mobile data equivalent to 50,000 IDR ( $\approx$  3.5 USD) before the first  
8  
9 487 session of tele-Indo-DARPP, and receive the same amount of mobile data every time they attended  
10  
11 488 four sessions of tele-Indo-DARPP. As all monetary amounts were set at the approximate cost, the  
12  
13 489 amounts are intended purely for compensation and not as reward, as in contingency management.  
14  
15 490 For providers, compensation of 170,000 IDR ( $\approx$  12.1 USD) and 150,000 IDR ( $\approx$  10.7 USD) will  
16  
17 491 be given for each tele-Indo-DARPP session to facilitator and co-facilitator, respectively.  
18  
19  
20  
21  
22  
23

### 24 493 **Data monitoring**

25  
26 494 Data on adverse events including hospitalisation, arrest, and death will be collected from the  
27  
28 495 participants' treating psychiatrist or medical staff. In addition, participants will be interviewed at  
29  
30 496 T2 on whether they experience any subjective harmful effects (e.g., withdrawal syndrome,  
31  
32 497 increased cravings) after joining Indo-DARPP. An independent data monitoring committee will  
33  
34 498 not be convened, as the study involves short-term non-invasive psychotherapeutic intervention.  
35  
36 499 No interim analysis is planned due to the short duration of intervention. Completeness and  
37  
38 500 accuracy of data collection will be checked by Japanese co-investigators, and there will be no  
39  
40 501 auditing process by independent investigators.  
41  
42  
43  
44  
45  
46

### 47 503 **Data publication**

48  
49 504 Deidentified results of the study will be published in scientific publication, and reported to  
50  
51 505 relevant government bodies in Indonesia to advocate adoption of the treatment module.  
52  
53  
54  
55  
56  
57  
58  
59  
60



## 507 **Ethical consideration and dissemination**

508 This study protocol (version 2.0, May 2020) was approved by the Research Ethical  
509 Committee of Faculty of Medicine, Universitas Indonesia (approval number: KET-1175/2019),  
510 the Ethics Committee of Graduate School and Faculty of Medicine, Kyoto University (approval  
511 number: C1483). The study protocol was registered at the University Hospital Medical Information  
512 Network clinical trial registry (UMIN-CTR) (registry number: UMIN000042186).

513 Consent process will be conducted carefully to ensure that all potential participants fully  
514 understand research objectives, procedures, risks, benefits, costs, and alternatives. It will be  
515 emphasised that study participation is voluntary and consent can be withdrawn at any time before  
516 research publication. We will allocate participants to treatment arms only when written informed  
517 consents for participation are obtained. Likewise, urine specimens will only be collected if written  
518 informed consents for urine collection are obtained. Participants will not receive any adverse  
519 influence in deciding study participation and/or urine collection. Personal data will be protected  
520 by separating study data from participants' identifiable information. To quickly respond to adverse  
521 events arising when outpatient visits are not possible, a dedicated phone number and a WhatsApp  
522 account for the study will be opened to ease communication to the research team. Participants will  
523 be instructed to text or call when experiencing any adverse events. Importantly, written agreement  
524 will be obtained from participants to never share others' information to any third party. This  
525 regulation will be enforced in both during and outside tele-Indo-DARPP sessions, in any medium,  
526 including video conference and group chat.

527 Results of this study will be disseminated into peer-reviewed journals and international  
528 academic conferences. Provided positive outcomes, Indo-DARPP will be advocated to the  
529 Indonesian government for adoption as a nationwide formal treatment program.

530

**531 Patient and public involvement**

532 Patients' feedback during the pilot study was incorporated into the Indo-DARPP module design.

533 Apart from that, patients and/or the public were not involved in the conduct, reporting, or  
534 dissemination plans of this study.

535

**536 Discussion**

537 Up until the time of writing, nine RCTs from LMICs have reported the effectiveness of digital  
538 delivery of interventions for SUD. Utilised formats were telephone calls,<sup>107–110</sup> webpages,<sup>111–113</sup>  
539 and mobile applications,<sup>101,114</sup> however, no study in LMICs has so far investigated the  
540 effectiveness of video-conference-based psychotherapy. The latter may facilitate honest,  
541 interactive discussions on personal substance use and cravings, founded on better rapport between  
542 providers and patients,<sup>115</sup> all of which is integral for CBT for SUD. One meta-analysis concluded  
543 that web-based mental health interventions had better retention rate and treatment outcomes when  
544 therapists were synchronously involved.<sup>116</sup>

545 The proposed study has several strengths. This is the first RCT to investigate the  
546 effectiveness of video-conference based psychotherapy in any LMIC, as well as the first study to  
547 establish quality evidence on psychotherapy for SUD in Indonesia. Recruitment will be done  
548 throughout multiple levels of care, i.e., tertiary (referral hospitals), primary (Puskesmas) and  
549 community (rehabilitation centres). The latter have extensive reach encompassing all major  
550 Indonesian islands, and advertising will be done via online social media, facilitating recruitment  
551 from across the nation. While CBT effectiveness is the primary outcome, the study allows  
552 elucidation of real-world implementation and cost-effectiveness in a hybrid effectiveness-

1  
2  
3 553 implementation design.<sup>65</sup> This is particularly true in Puskesmas, where the providers will be  
4  
5 554 general practitioners, and in rehabilitation centres, where the providers will be peer counsellors.  
6  
7  
8 555 This pragmatic RCT aims to mimic the usual clinical practice, and we hope that the result may be  
9  
10 556 used to inform decision-making by patients, providers, and policymakers.<sup>117</sup>  
11

12  
13 557         Several limitations can also be presumed. All data from participants will be self-reported  
14  
15 558 and prone to recall and social desirability bias. Urine tests will be done to corroborate subjective  
16  
17 559 data, but this is not a full validation as it is only done once to represent substance-detectable period  
18  
19 560 within a 28-days period, and only at T2, which in turn was planned to improve feasibility for  
20  
21 561 participants and reduce drop-out risk. Control conditions will be heterogeneous, as the study will  
22  
23 562 include people who use various substances, in multiple sites where TAU differs, and possibly  
24  
25 563 people who are not receiving any treatment. Variability in the providers' background may create  
26  
27 564 inconsistency in CBT delivery, even though training and treatment manuals were introduced as an  
28  
29 565 effort to standardise care. Treatment delivery via online video-conferencing might have poor  
30  
31 566 generalisability toward people with low internet literacy, as well as people in low socio-economic  
32  
33 567 strata who could not afford smartphones—although entry-level Android-based smartphones (less  
34  
35 568 than 100 USD) are available nationwide in Indonesia. Group psychotherapy provided in the  
36  
37 569 Indonesian language would induce low external validity to people with limited proficiency in the  
38  
39 570 language.  
40  
41  
42  
43  
44

45 571         Efforts to establish evidence-based treatment for SUD should be scaled up in Indonesia  
46  
47 572 and LMICs in general, where effectiveness data is sparse. The proposed study may present high-  
48  
49 573 quality evidence, and a successful outcome may birth a new SUD treatment module in Indonesia,  
50  
51 574 paving way for the adoption of Indo-DARPP into the national guideline. We hope that our efforts  
52  
53  
54  
55  
56  
57  
58  
59  
60

1  
2  
3 575 may further promote a comprehensive, healthcare approach—as opposed to repressive anti-drug  
4  
5 576 policies for the SUD population.  
6  
7

8 577

9  
10 578 **Acknowledgement**

11  
12  
13 579 We would like to thank Dr Takashi Kawamura for his valuable comments on the study design.  
14  
15

16 580

17  
18  
19 581 **Author contributions**

20  
21 582 CY, KS, and YO conceptualised the study. CY, KS, EH, and YO are the main developers of the  
22  
23 583 Indo-DARPP module, designed study methodology, invited and coordinated site investigators,  
24  
25 584 conducted training of providers, wrote the protocol, reviewed and edited the final manuscript. EB,  
26  
27 585 VR, PA, and AP helped in module development, study design, training of providers, and site  
28  
29 586 coordination. TS provided biostatistical and epidemiological supervision. TM provided the  
30  
31 587 original SMARPP module and clinical input and perspectives to improve study quality. RS  
32  
33 588 supervised the whole study and procured grants. CY and RS are the principal investigators of the  
34  
35 589 grants. All authors have read and approved the final manuscript.  
36  
37  
38  
39  
40  
41  
42

43 590

44 591 **Funding**

45  
46 592 This work was supported by the Japan-ASEAN Platform for Transdisciplinary Studies project of  
47  
48 593 the Center for Southeast Asian Studies of Kyoto University, Research Unit for Development of  
49  
50 594 Global Sustainability of Kyoto University, and Japan Society for the Promotion of Science (JSPS)  
51  
52 595 Grants-in-Aid for Scientific Research (KAKENHI) (Grant number JP19K24256).  
53  
54

55 596  
56  
57  
58  
59  
60

1  
2  
3 **597 Competing interests**  
4

5 598 The authors declare no competing interest.  
6  
7

8 599

9  
10 **600 Patient consent for publication**  
11

12 601 Not required.  
13  
14

15 602

16  
17 **603 Ethics approval and trial registration**  
18

19 604 This study protocol was approved by the Research Ethical Committee of Faculty of Medicine,  
20  
21 605 Universitas Indonesia (approval number: KET-1175/2019), and the Ethics Committee of Graduate  
22  
23 606 School and Faculty of Medicine, Kyoto University (approval number: C1483). The study protocol  
24  
25 607 was registered at the University Hospital Medical Information Network clinical trial registry  
26  
27  
28 608 (UMIN-CTR) (registry number: UMIN000042186).  
29

30  
31 609

32  
33 **610 Availability of data and materials**  
34

35  
36 611 The full protocol and datasets of the planned study will be available from the corresponding author  
37  
38 612 on reasonable request.  
39

40 613

41 614

42  
43 **615 Figure legends**  
44

45  
46 616 **Figure 1.** Study flowchart for each site. A total of 20 or 30 participants will be recruited through  
47  
48 617 the social network of each site. After 10 participants have been recruited to constitute one wave,  
49  
50 618 randomisation will be done to allocate participants into two groups: intervention (Indo-DARPP +  
51  
52 619 TAU) and control (TAU only), with 5 participants in each group. Recruitment will be continued  
53  
54  
55 620 until another 10 or 20 participants (second or third wave) joined before randomisation and  
56  
57  
58

1  
2  
3 621 allocation similar as before. Treatment period will be 12 weeks. Assessments will be done four  
4  
5 622 times: T1 (Week 0) during baseline or before randomisation, T2 (Week 13-16) during post-  
6  
7 623 assessment or 1-4 weeks after treatment period ends, T3 (Week 24) at 3 months after treatment  
8  
9 624 ends, and T4 (Week 60) at 12 months after treatment ends.

625

14 626 **Figure 2.** Planned trial schedule across all 8 research sites. Staggered schedules were designed to  
15  
16 627 spread the workload of providers in regard to Indo-DARPP intervention, as well as research staff  
17  
18 628 in regard to assessments. After training of providers, all sites were given approximately 1-2  
19  
20 629 months to recruit participants. Sites with relatively higher potential to recruit faster, i.e., those  
21  
22 630 with higher rate of patient turnover, were selected ahead in the schedule. Each site will have 2 or  
23  
24 631 3 waves of recruitment and treatment periods.

632

633

## 634 **References**

- 35  
36 635 1. GBD 2016 Alcohol and Drug Use Collaborators. The global burden of disease attributable to alcohol  
37 636 and drug use in 195 countries and territories, 1990–2016: A systematic analysis for the Global  
38 637 Burden of Disease Study 2016. *Lancet Psychiatry* 2018; 5: 987–1012.
- 40 638 2. Murray CJL, Aravkin AY, Zheng P, et al. Global burden of 87 risk factors in 204 countries and  
41 639 territories, 1990–2019: A systematic analysis for the Global Burden of Disease Study 2019. *Lancet*  
42 640 2020; 396: 1223–1249.
- 44 641 3. Peacock A, Leung J, Larney S, et al. Global statistics on alcohol, tobacco and illicit drug use: 2017  
45 642 status report. *Addiction* 2018; 113: 1905–1926.
- 47 643 4. United Nations Office on Drugs and Crimes. *World Drug Report 2020*. Vienna: UNODC, 2020.
- 49 644 5. Connery HS, McHugh RK, Reilly M, et al. Substance use disorders in global mental health delivery:  
50 645 Epidemiology, treatment gap, and implementation of evidence-based treatments. *Harv Rev*  
51 646 *Psychiatry* 2020; 28: 316–327.
- 53 647 6. Lora A, Hanna F, Chisholm D. Mental health service availability and delivery at the global level: An  
54 648 analysis by countries' income level from WHO's Mental Health Atlas 2014. *Epidemiol Psychiatr Sci*  
55 649 2017; 1–12.

- 1  
2  
3 650 7. Rawson RA, Woody G, Kresina TF, et al. The globalization of addiction research: Capacity-building  
4 651 mechanisms and selected examples. *Harv Rev Psychiatry* 2015; 23: 147–156.
- 6 652 8. Degenhardt L, Glantz M, Evans-Lacko S, et al. Estimating treatment coverage for people with  
7 653 substance use disorders: An analysis of data from the World Mental Health Surveys. *World*  
8 654 *Psychiatry* 2017; 16: 299–307.
- 10 655 9. Puslitdatin Badan Narkotika Nasional. *Indonesia drugs report 2019*. Jakarta: Badan Narkotika  
11 656 Nasional, 1 August 2019.
- 13 657 10. Puslitdatin Badan Narkotika Nasional. *Survei penyalahgunaan dan peredaran gelap narkoba tahun*  
14 658 *2018 [Survey of illicit drug abuse and black marketing in 2018]*. Badan Narkotika Nasional,  
15 659 [https://perpustakaan.bnn.go.id/sites/default/files/Buku\\_Digital\\_2020-](https://perpustakaan.bnn.go.id/sites/default/files/Buku_Digital_2020-10/Survei%20Penyalahgunaan%20Dan%20Peredaran%20Gelap%20Narkoba%20Tahun%202018%20%28%20BNN%20-%20LIPI%29.pdf)  
16 660 [10/Survei%20Penyalahgunaan%20Dan%20Peredaran%20Gelap%20Narkoba%20Tahun%202018%](https://perpustakaan.bnn.go.id/sites/default/files/Buku_Digital_2020-10/Survei%20Penyalahgunaan%20Dan%20Peredaran%20Gelap%20Narkoba%20Tahun%202018%20%28%20BNN%20-%20LIPI%29.pdf)  
17 661 [20%28%20BNN%20-%20LIPI%29.pdf](https://perpustakaan.bnn.go.id/sites/default/files/Buku_Digital_2020-10/Survei%20Penyalahgunaan%20Dan%20Peredaran%20Gelap%20Narkoba%20Tahun%202018%20%28%20BNN%20-%20LIPI%29.pdf) (1 May 2019, accessed 4 December 2020).
- 19 662 11. Lynch C. Indonesia's use of capital punishment for drug-trafficking crimes: Legal obligations,  
20 663 extralegal factors, and the Bali Nine Case. *Colum Hum Rts L Rev* 2008; 40: 523.
- 22 664 12. Puslitdatin Badan Narkotika Nasional. *Ringkasan eksekutif hasil survei BNN tahun 2016 [Executive*  
23 665 *summary of survey result by BNN in 2016]*. Jakarta: Badan Narkotika Nasional,  
24 666 <https://www.issup.net/files/2017-10/penelitian%20prevelansi%20UI%20dan%20BNN.pdf> (1  
25 667 February 2017).
- 27 668 13. Al-Ansari B, Thow A-M, Day CA, et al. Extent of alcohol prohibition in civil policy in Muslim  
28 669 majority countries: The impact of globalization. *Addiction* 2016; 111: 1703–1713.
- 30 670 14. World Health Organization. *Global Status Report on Alcohol and Health 2018*. World Health  
31 671 Organization, 2019.
- 33 672 15. Media Indonesia. Banyak narkoba jenis baru masuk ke Indonesia [A lot of new types of illicit drugs  
34 673 has entered Indonesia]. *Media Indonesia*, [https://mediaindonesia.com/politik-dan-](https://mediaindonesia.com/politik-dan-hukum/325442/banyak-narkoba-jenis-baru-masuk-ke-indonesia)  
35 674 [hukum/325442/banyak-narkoba-jenis-baru-masuk-ke-indonesia](https://mediaindonesia.com/politik-dan-hukum/325442/banyak-narkoba-jenis-baru-masuk-ke-indonesia) (2020, accessed 4 December 2020).
- 37 675 16. Kosten TR, Petrakis IL. The hidden epidemic of opioid overdoses during the Coronavirus Disease  
38 676 2019 pandemic. *JAMA Psychiatry*. Epub ahead of print 30 December 2020. DOI:  
39 677 10.1001/jamapsychiatry.2020.4148.
- 41 678 17. Kementerian Kesehatan Republik Indonesia. *Aplikasi komunikasi data [Data communication*  
42 679 *application]*. {Kementerian Kesehatan Republik Indonesia},  
43 680 <https://komdat.kemkes.go.id/lama/index.php> (2020, accessed 10 January 2021).
- 45 681 18. Idaiani S, Riyadi EI. Sistem kesehatan jiwa di indonesia: Tantangan untuk memenuhi kebutuhan  
46 682 [Indonesian mental health system: The challenge to fulfill needs]. *Jurnal Penelitian dan*  
47 683 *Pengembangan Pelayanan Kesehatan* 2018; 70–80.
- 49 684 19. Marastuti A, Subandi MA, Retnowati S, et al. Development and evaluation of a mental health  
50 685 training program for community health workers in indonesia. *Community Ment Health J* 2020; 56:  
51 686 1248–1254.
- 53 687 20. Wammes JJG, Siregar AY, Hidayat T, et al. Cost-effectiveness of methadone maintenance therapy  
54 688 as HIV prevention in an Indonesian high-prevalence setting: A mathematical modeling study. *Int J*

- 1  
2  
3 689 *Drug Policy* 2012; 23: 358–364.  
4  
5 690 21. Afriandi I, Siregar AYM, Meheus F, et al. Costs of hospital-based methadone maintenance treatment  
6 691 in HIV/AIDS control among injecting drug users in Indonesia. *Health Policy* 2010; 95: 69–73.  
7  
8 692 22. Sharma M, Oppenheimer E, Saidel T, et al. A situation update on HIV epidemics among people who  
9 693 inject drugs and national responses in South-East Asia Region. *AIDS* 2009; 23: 1405–1413.  
10  
11 694 23. Sarasvita R, Tonkin A, Utomo B, et al. Predictive factors for treatment retention in methadone  
12 695 programs in Indonesia. *J Subst Abuse Treat* 2012; 42: 239–246.  
13  
14 696 24. Rumah Sakit Ketergantungan Obat. *Laporan Kegiatan Tahunan (Annual Report) 2007*. {Rumah  
15 697 Sakit Ketergantungan Obat}, 2008.  
16  
17 698 25. Iskandar S, van Crevel R, Hidayat T, et al. Severity of psychiatric and physical problems is  
18 699 associated with lower quality of life in methadone patients in Indonesia. *Am J Addict* 2013; 22: 425–  
19 700 431.  
20  
21 701 26. Herindrasti VLS. Drug-free ASEAN 2025: Tantangan Indonesia dalam penanggulangan  
22 702 penyalahgunaan narkoba [Drug-free ASEAN 2025: Indonesia’s challenge in tackling drugs abuse].  
23 703 *Jurnal Hubungan Internasional* 2018; 7: 19–33.  
24  
25 704 27. Kramer E, Stoicescu C. An uphill battle: A case example of government policy and activist dissent  
26 705 on the death penalty for drug-related offences in Indonesia. *Int J Drug Policy* 2021; 103265.  
27  
28 706 28. McHugh RK, Hearon BA, Otto MW. Cognitive behavioral therapy for substance use disorders.  
29 707 *Psychiatr Clin North Am* 2010; 33: 511–525.  
30  
31 708 29. Magill M, Ray LA. Cognitive-behavioral treatment with adult alcohol and illicit drug users: A meta-  
32 709 analysis of randomized controlled trials. *J Stud Alcohol Drugs* 2009; 70: 516–527.  
33  
34 710 30. Bigelow GE, Silverman K. Theoretical and empirical foundations of contingency management  
35 711 treatments for drug abuse, <https://psycnet.apa.org/record/1999-02363-001> (1999).  
36  
37 712 31. Miller WR, Rollnick S. *Motivational Interviewing: Helping People Change*. Guilford Press, 2012.  
38  
39 713 32. Miller WR, Rollnick S. *Motivational interviewing: Preparing people for change*, 2nd ed. 2002; 2:  
40 714 428.  
41  
42 715 33. Alan Marlatt G, Gordon JR. *Relapse Prevention: Maintenance Strategies in the Treatment of*  
43 716 *Addictive Behaviors*. Guilford Press, 1985.  
44  
45 717 34. Sobell LC, Sobell MB, Agrawal S. Randomized controlled trial of a cognitive–behavioral  
46 718 motivational intervention in a group versus individual format for substance use disorders. *Psychol*  
47 719 *Addict Behav* 2009; 23: 672–683.  
48  
49 720 35. Sobell LC, Sobell MB. *Group Therapy for Substance Use Disorders: A Motivational Cognitive-*  
50 721 *behavioral Approach*. Guilford Press, 2011.  
51  
52 722 36. Myers B. 11 - Psychotherapy for substance use disorders. In: Stein DJ, Bass JK, Hofmann SG (eds)  
53 723 *Global Mental Health and Psychotherapy*. Academic Press, 2019, pp. 241–256.  
54  
55 724 37. Heijdra Suasnabar JM, Hipple Walters B. Community-based psychosocial substance use disorder



- 1  
2  
3 725 interventions in low-and-middle-income countries: A narrative literature review. *Int J Ment Health*  
4 726 *Syst* 2020; 14: 74.  
5  
6 727 38. Joseph J, Basu D. Efficacy of Brief Interventions in Reducing Hazardous or Harmful Alcohol Use in  
7 728 Middle-Income Countries: Systematic Review of Randomized Controlled Trials. *Alcohol Alcohol*  
8 729 2017; 52: 56–64.  
9  
10 730 39. Preusse M, Neuner F, Ertl V. Effectiveness of Psychosocial Interventions Targeting Hazardous and  
11 731 Harmful Alcohol Use and Alcohol-Related Symptoms in Low- and Middle-Income Countries: A  
12 732 Systematic Review. *Front Psychiatry* 2020; 11: 768.  
13  
14 733 40. Ögel K, Coskun S. Cognitive behavioral therapy-based brief intervention for volatile substance  
15 734 misusers during adolescence: A follow-up study. *Subst Use Misuse* 2011; 46 Suppl 1: 128–133.  
16  
17 735 41. Min Z, Xu L, Chen H, et al. A pilot assessment of relapse prevention for heroin addicts in a Chinese  
18 736 rehabilitation center. *Am J Drug Alcohol Abuse* 2011; 37: 141–147.  
19  
20 737 42. Wechsberg WM, Krupitsky E, Romanova T, et al. Double jeopardy--drug and sex risks among  
21 738 Russian women who inject drugs: Initial feasibility and efficacy results of a small randomized  
22 739 controlled trial. *Subst Abuse Treat Prev Policy* 2012; 7: 1.  
23  
24 740 43. Pan S, Jiang H, Du J, et al. Efficacy of Cognitive Behavioral Therapy on Opiate Use and Retention  
25 741 in Methadone Maintenance Treatment in China: A Randomised Trial. *PLoS One* 2015; 10:  
26 742 e0127598.  
27  
28 743 44. Alammehrjerdi Z, Briggs NE, Biglarian A, et al. A Randomized Controlled Trial of Brief Cognitive  
29 744 Behavioral Therapy for Regular Methamphetamine Use in Methadone Treatment. *Journal of*  
30 745 *Psychoactive Drugs* 2019; 51: 280–289.  
31  
32 746 45. Pols H. The future of mental health care in Indonesia. *Inside Indonesia*,  
33 747 <https://www.insideindonesia.org/the-future-of-mental-health-care-in-indonesia> (2020, accessed 10  
34 748 January 2021).  
35  
36 749 46. Rahman DF. Traffic jam: Jakarta roads remain one of world's most congested. *The Jakarta Post*,  
37 750 [https://www.thejakartapost.com/news/2020/02/06/traffic-jam-jakarta-roads-remain-one-of-worlds-](https://www.thejakartapost.com/news/2020/02/06/traffic-jam-jakarta-roads-remain-one-of-worlds-most-congested.html)  
38 751 [most-congested.html](https://www.thejakartapost.com/news/2020/02/06/traffic-jam-jakarta-roads-remain-one-of-worlds-most-congested.html) (2020, accessed 10 January 2021).  
39  
40 752 47. Mannarini S, Boffo M. Anxiety, bulimia, drug and alcohol addiction, depression, and schizophrenia:  
41 753 what do you think about their aetiology, dangerousness, social distance, and treatment? A latent class  
42 754 analysis approach. *Soc Psychiatry Psychiatr Epidemiol* 2015; 50: 27–37.  
43  
44 755 48. Staton-Tindall M, Havens JR, Webster JM, et al. METelemedicine: A pilot study with rural alcohol  
45 756 users on community supervision: A pilot study with rural alcohol users. *J Rural Health* 2014; 30:  
46 757 422–432.  
47  
48 758 49. Baca CT, Manuel JK. Satisfaction with long-distance motivational interviewing for problem  
49 759 drinking. *Addict Disord Their Treat* 2007; 6: 39.  
50  
51 760 50. De Leo JA, Lamb K, LaRowe S, et al. A brief behavioral telehealth intervention for veterans with  
52 761 alcohol misuse problems in VA primary care. *Drug Alcohol Depend* 2014; 140: e45.  
53  
54 762 51. Tarp K, Bojesen AB, Mejldal A, et al. Effectiveness of optional videoconferencing-based treatment  
55 763 of alcohol use disorders: Randomized controlled trial. *JMIR Ment Health* 2017; 4: e38.  
56  
57  
58  
59  
60

- 1  
2  
3 764 52. King VL, Stoller KB, Kidorf M, et al. Assessing the effectiveness of an Internet-based  
4 765 videoconferencing platform for delivering intensified substance abuse counseling. *J Subst Abuse*  
5 766 *Treat* 2009; 36: 331–338.  
6  
7 767 53. King VL, Brooner RK, Peirce JM, et al. A randomized trial of Web-based videoconferencing for  
8 768 substance abuse counseling. *J Subst Abuse Treat* 2014; 46: 36–42.  
9  
10 769 54. Boumparis N, Schulte MHJ, Riper H. Digital mental health for alcohol and substance use disorders.  
11 770 *Current Treatment Options in Psychiatry* 2019; 6: 352–366.  
12  
13 771 55. Naslund JA, Aschbrenner KA, Araya R, et al. Digital technology for treating and preventing mental  
14 772 disorders in low-income and middle-income countries: A narrative review of the literature. *Lancet*  
15 773 *Psychiatry* 2017; 4: 486–500.  
16  
17 774 56. Lin LA, Casteel D, Shigekawa E, et al. Telemedicine-delivered treatment interventions for substance  
18 775 use disorders: A systematic review. *J Subst Abuse Treat* 2019; 101: 38–49.  
19  
20 776 57. Boumparis N, Karyotaki E, Schaub MP, et al. Internet interventions for adult illicit substance users:  
21 777 A meta-analysis. *Addiction* 2017; 112: 1521–1532.  
22  
23 778 58. Boumparis N, Loheide-Niesmann L, Blankers M, et al. Short- and long-term effects of digital  
24 779 prevention and treatment interventions for cannabis use reduction: A systematic review and meta-  
25 780 analysis. *Drug Alcohol Depend* 2019; 200: 82–94.  
26  
27 781 59. Fu Z, Burger H, Arjadi R, et al. Effectiveness of digital psychological interventions for mental health  
28 782 problems in low-income and middle-income countries: A systematic review and meta-analysis.  
29 783 *Lancet Psychiatry* 2020; 7: 851–864.  
30  
31 784 60. The Mobile Economy. *The Mobile Economy Asia Pacific 2020*. {The Mobile Economy},  
32 785 <https://www.gsma.com/mobileeconomy/asiapacific> (2020, accessed 10 January 2021).  
33  
34 786 61. Shore JH, Schneck CD, Mishkind MC. Telepsychiatry and the Coronavirus Disease 2019 pandemic-  
35 787 current and future outcomes of the rapid virtualization of psychiatric care. *JAMA Psychiatry*. Epub  
36 788 ahead of print 11 May 2020. DOI: 10.1001/jamapsychiatry.2020.1643.  
37  
38 789 62. Molfenter T, Roget N, Chaple M, et al. Use of telehealth in substance use disorder (SUD) services  
39 790 during and after COVID-19. *JMIR Ment Health*. Epub ahead of print 19 January 2021. DOI:  
40 791 10.2196/25835.  
41  
42 792 63. Adepoju P. Africa turns to telemedicine to close mental health gap. *Lancet Digit Health* 2020; 2:  
43 793 e571–e572.  
44  
45 794 64. Minas H. Mental health in a post-pandemic ASEAN. *The ASEAN*, 2021, pp. 37–38.  
46  
47 795 65. Curran GM, Bauer M, Mittman B, et al. Effectiveness-implementation hybrid designs: Combining  
48 796 elements of clinical effectiveness and implementation research to enhance public health impact. *Med*  
49 797 *Care* 2012; 50: 217–226.  
50  
51 798 66. United Nations Office on Drugs and Crime. *Guidance for Community-Based Treatment and Care*  
52 799 *Services for People Affected by Drug Use and Dependence in Southeast Asia*. UNODC,  
53 800 [https://www.unodc.org/documents/southeastasiaandpacific/cbtx/cbtx\\_guidance\\_EN.pdf](https://www.unodc.org/documents/southeastasiaandpacific/cbtx/cbtx_guidance_EN.pdf) (2014).  
54  
55 801 67. Nordfjærn T. Relapse patterns among patients with substance use disorders. *J Subst Use* 2011; 16:

- 1  
2  
3 802 313–329.  
4  
5 803 68. Brecht ML, Herbeck D. Time to relapse following treatment for methamphetamine use: A long-term  
6 804 perspective on patterns and predictors. *Drug Alcohol Depend* 2014; 139: 18–25.  
7  
8 805 69. Tosh G, Soares-Weiser K, Adams CE. Pragmatic vs explanatory trials: The pragmascope tool to help  
9 806 measure differences in protocols of mental health randomized controlled trials. *Dialogues Clin*  
10 807 *Neurosci* 2011; 13: 209–215.  
11  
12 808 70. Matsumoto T, Imamura F, Kobayashi O, et al. [Development and evaluation of a relapse prevention  
13 809 tool for drug-abusing delinquents incarcerated in a juvenile classification home: A self-teaching  
14 810 workbook for adolescents, the "SMARPP-Jr]. *Nihon Arukoru Yakubutsu Igakkai Zasshi* 2009; 44:  
15 811 121–138.  
16  
17 812 71. Obert JL, McCann MJ, Marinelli-Casey P, et al. The matrix model of outpatient stimulant abuse  
18 813 treatment: History and description. *J Psychoactive Drugs* 2000; 32: 157–164.  
19  
20 814 72. Kondo A, Ide M, Takahashi I, et al. [Evaluation of the relapse prevention program for substance  
21 815 abusers called 'TAMARPP' at mental health and welfare center]. *Nihon Arukoru Yakubutsu Igakkai*  
22 816 *Zasshi* 2014; 49: 119–135.  
23  
24 817 73. Matsumoto T, Chiba Y, Imamura F, et al. Possible effectiveness of intervention using a self-teaching  
25 818 workbook in adolescent drug abusers detained in a juvenile classification home. *Psychiatry Clin*  
26 819 *Neurosci* 2011; 65: 576–583.  
27  
28 820 74. Tanibuchi Y, Matsumoto T, Imamura F, et al. [Efficacy of the Serigaya Methamphetamine Relapse  
29 821 Prevention Program (SMARPP) for patients with drug use disorder: A study on factors influencing  
30 822 1-year follow-up outcomes]. *Nihon Arukoru Yakubutsu Igakkai Zasshi* 2016; 51: 38–54.  
31  
32 823 75. Rawson RA, Huber A, McCann M, et al. A comparison of contingency management and cognitive-  
33 824 behavioral approaches during methadone maintenance treatment for cocaine dependence. *Arch Gen*  
34 825 *Psychiatry* 2002; 59: 817–824.  
35  
36 826 76. Carroll KM, Kiluk BD, Nich C, et al. Toward empirical identification of a clinically meaningful  
37 827 indicator of treatment outcome: Features of candidate indicators and evaluation of sensitivity to  
38 828 treatment effects and relationship to one year follow up cocaine use outcomes. *Drug Alcohol Depend*  
39 829 2014; 137: 3–19.  
40  
41 830 77. Fals-Stewart W, O'Farrell TJ, Freitas TT, et al. The timeline followback reports of psychoactive  
42 831 substance use by drug-abusing patients: Psychometric properties. *J Consult Clin Psychol* 2000; 68:  
43 832 134–144.  
44  
45 833 78. Carey KB, Carey MP, Maisto SA, et al. Temporal stability of the timeline followback interview for  
46 834 alcohol and drug use with psychiatric outpatients. *J Stud Alcohol* 2004; 65: 774–781.  
47  
48 835 79. McLellan AT, Luborsky L, Woody GE, et al. An improved diagnostic evaluation instrument for  
49 836 substance abuse patients. The Addiction Severity Index. *J Nerv Ment Dis* 1980; 168: 26–33.  
50  
51 837 80. Kosten TR, Rounsaville BJ, Kleber HD. Concurrent validity of the addiction severity index. *J Nerv*  
52 838 *Ment Dis* 1983; 171: 606–610.  
53  
54 839 81. Hendriks VM, Kaplan CD, van Limbeek J, et al. The Addiction Severity Index: Reliability and  
55 840 validity in a Dutch addict population. *J Subst Abuse Treat* 1989; 6: 133–141.  
56  
57  
58  
59  
60

- 1  
2  
3 841 82. Carise D. *Addiction Severity Index Treatnet Version: Manual and Question by Question 'Q by Q'*  
4 842 *Guide*. United Nations Office on Drugs and Crime, 2007.  
5  
6 843 83. Herdman M, Gudex C, Lloyd A, et al. Development and preliminary testing of the new five-level  
7 844 version of EQ-5D (EQ-5D-5L). *Qual Life Res* 2011; 20: 1727–1736.  
8  
9 845 84. Janssen MF, Simon Pickard A, Golicki D, et al. Measurement properties of the EQ-5D-5L compared  
10 846 to the EQ-5D-3L across eight patient groups: A multi-country study. *Quality of Life Research* 2013;  
11 847 22: 1717–1727.  
12  
13 848 85. Rand K, Arnevik EA, Walderhaug E. Quality of life among patients seeking treatment for substance  
14 849 use disorder, as measured with the EQ-5D-3L. *J Patient Rep Outcomes* 2020; 4: 92.  
15  
16 850 86. Goranitis I, Coast J, Day E, et al. Measuring health and broader well-being benefits in the context of  
17 851 opiate dependence: The psychometric performance of the ICECAP-A and the EQ-5D-5L. *Value*  
18 852 *Health* 2016; 19: 820–828.  
19  
20 853 87. Purba FD, Hunfeld JAM, Iskandarsyah A, et al. The Indonesian EQ-5D-5L value set.  
21 854 *Pharmacoeconomics* 2017; 35: 1153–1165.  
22  
23 855 88. McConaughy EA, Prochaska JO, Velicer WF. Stages of change in psychotherapy: Measurement  
24 856 and sample profiles. *Group Dyn* 1983; 20: 368–375.  
25  
26 857 89. DiClemente CC, Schlundt D, Gemmell L. Readiness and stages of change in addiction treatment. *Am*  
27 858 *J Addict* 2004; 13: 103–119.  
28  
29 859 90. Carver CS. You want to measure coping but your protocol's too long: Consider the brief COPE. *Int J*  
30 860 *Behav Med* 1997; 4: 92–100.  
31  
32 861 91. Berg MK, Hobkirk AL, Joska JA, et al. The role of substance use coping in the relation between  
33 862 childhood sexual abuse and depression among methamphetamine users in South Africa. *Psychol*  
34 863 *Trauma* 2017; 9: 493–499.  
35  
36 864 92. Derogatis LR, Savitz KL. The SCL-90-R, brief symptom inventory, and matching clinical rating  
37 865 scales. In: Maruish ME (ed) *The Use of Psychological Testing for Treatment Planning and*  
38 866 *Outcomes Assessment*. Lawrence Erlbaum Associates Publishers, xvi: Mahwah, NJ, US, 1999, pp.  
39 867 679–724.  
40  
41 868 93. Bergly TH, Nordfjærn T, Hagen R. The dimensional structure of SCL-90-R in a sample of patients  
42 869 with substance use disorder. *J Subst Use* 2014; 19: 257–261.  
43  
44 870 94. Ryan JJ, Geisser ME. Validity and diagnostic accuracy of an alternate form of the Rey Auditory  
45 871 Verbal Learning Test. *Arch Clin Neuropsychol* 1986; 1: 209–217.  
46  
47 872 95. Potvin S, Pelletier J, Grot S, et al. Cognitive deficits in individuals with methamphetamine use  
48 873 disorder: A meta-analysis. *Addict Behav* 2018; 80: 154–160.  
49  
50 874 96. Rosa B, Oliveira J, Gamito P, et al. Cognitive improvement via mHealth for patients recovering from  
51 875 substance use disorder. In: *International Workshops on ICTs for Improving Patients Rehabilitation*  
52 876 *Research Techniques*. Springer International Publishing, 2017, pp. 69–82.  
53  
54 877 97. Ritsher JB, Otilingam PG, Grajales M. Internalized stigma of mental illness: Psychometric properties  
55 878 of a new measure. *Psychiatry Res* 2003; 121: 31–49.  
56  
57  
58  
59  
60

- 1  
2  
3 879 98. Larsen DL, Attkisson CC, Hargreaves WA, et al. Assessment of client/patient satisfaction:  
4 880 Development of a general scale. *Eval Program Plann* 1979; 2: 197–207.  
5  
6 881 99. Boden MT, Kimerling R, Jacobs-Lentz J, et al. Seeking Safety treatment for male veterans with a  
7 882 substance use disorder and post-traumatic stress disorder symptomatology. *Addiction* 2012; 107:  
8 883 578–586.  
9  
10 884 100. Marziliano A, Pessin H, Rosenfeld B, et al. Measuring Cohesion and Self-Disclosure in  
11 885 Psychotherapy Groups for Patients with Advanced Cancer: An Analysis of the Psychometric  
12 886 Properties of the Group Therapy Experience Scale. *Int J Group Psychother* 2018; 68: 407–427.  
13  
14 887 101. Liang D, Han H, Du J, et al. A pilot study of a smartphone application supporting recovery from  
15 888 drug addiction. *J Subst Abuse Treat* 2018; 88: 51–58.  
16  
17 889 102. Kish L. *Survey sampling*. New York: Wiley, 1965.  
18  
19 890 103. Takano A, Miyamoto Y, Shinozaki T, et al. Effect of a web-based relapse prevention program on  
20 891 abstinence among Japanese drug users: A pilot randomized controlled trial. *J Subst Abuse Treat*  
21 892 2020; 111: 37–46.  
22  
23 893 104. Iachina M. The evaluation of the performance of IPWGEE, a simulation study. *Communications*  
24 894 *in Statistics - Simulation and Computation* 2009; 38: 1212–1227.  
25  
26 895 105. Carroll KM, Rounsaville BJ, Gordon LT, et al. Psychotherapy and pharmacotherapy for  
27 896 ambulatory cocaine abusers. *Arch Gen Psychiatry* 1994; 51: 177–187.  
28  
29 897 106. Rosenblum A, Magura S, Kayman DJ, et al. Motivationally enhanced group counseling for  
30 898 substance users in a soup kitchen: a randomized clinical trial. *Drug Alcohol Depend* 2005; 80: 91–  
31 899 103.  
32  
33 900 107. Fernandes S, Ferigolo M, Benchaya MC, et al. Brief Motivational Intervention and telemedicine:  
34 901 A new perspective of treatment to marijuana users. *Addict Behav* 2010; 35: 750–755.  
35  
36 902 108. Wongpakaran T, Petcharaj K, Wongpakaran N, et al. The effect of telephone-based intervention  
37 903 (TBI) in alcohol abusers: A pilot study. *J Med Assoc Thai* 2011; 94: 849–856.  
38  
39 904 109. Signor L, Pierozan PS, Ferigolo M, et al. Efficacy of the telephone-based Brief Motivational  
40 905 Intervention for alcohol problems in Brazil. *Braz J Psychiatry* 2013; 35: 254–261.  
41  
42 906 110. Marasinghe RB, Edirippulige S, Kavanagh D, et al. Effect of mobile phone-based psychotherapy  
43 907 in suicide prevention: A randomized controlled trial in Sri Lanka. *J Telemed Telecare* 2012; 18:  
44 908 151–155.  
45  
46 909 111. Christoff A de O, Boerngen-Lacerda R. Reducing substance involvement in college students: A  
47 910 three-arm parallel-group randomized controlled trial of a computer-based intervention. *Addict Behav*  
48 911 2015; 45: 164–171.  
49  
50 912 112. Baldin YC, Sanudo A, Sanchez ZM. Effectiveness of a web-based intervention in reducing binge  
51 913 drinking among nightclub patrons. *Rev Saude Publica* 2018; 52: 2.  
52  
53 914 113. Tiburcio M, Lara MA, Martínez N, et al. Web-based intervention to reduce substance abuse and  
54 915 depression: A three arm randomized trial in Mexico. *Subst Use Misuse* 2018; 53: 2220–2231.  
55  
56  
57  
58  
59  
60

- 1  
2  
3 916 114. Zhu Y, Jiang H, Su H, et al. A newly designed mobile-based computerized cognitive addiction  
4 917 therapy app for the improvement of cognition impairments and risk decision making in  
5 918 methamphetamine use disorder: Randomized controlled trial. *JMIR Mhealth Uhealth* 2018; 6:  
6 919 e10292.  
7  
8 920 115. Rush KL, Howlett L, Munro A, et al. Videoconference compared to telephone in healthcare  
9 921 delivery: A systematic review. *Int J Med Inform* 2018; 118: 44–53.  
10  
11 922 116. Spek V, Cuijpers P, Nyklíček I, et al. Internet-based cognitive behaviour therapy for symptoms of  
12 923 depression and anxiety: A meta-analysis. *Psychol Med* 2007; 37: 319–328.  
13  
14 924 117. Patsopoulos NA. A pragmatic view on pragmatic trials. *Dialogues Clin Neurosci* 2011; 13: 217–  
15 925 224.  
16  
17  
18  
19  
20  
21  
22  
23  
24  
25  
26  
27  
28  
29  
30  
31  
32  
33  
34  
35  
36  
37  
38  
39  
40  
41  
42  
43  
44  
45  
46  
47  
48  
49  
50  
51  
52  
53  
54  
55  
56  
57  
58  
59  
60

**Table 1.** Recruitment sites in this study

| Name                          | Location | Type                                          | Treatment as usual                                                                                           | Most reported primarily used substance                  |
|-------------------------------|----------|-----------------------------------------------|--------------------------------------------------------------------------------------------------------------|---------------------------------------------------------|
| Cipto Mangunkusumo Hospital   | Jakarta  | Tertiary national general hospital            | Individual psychotherapy, symptomatic pharmacotherapy                                                        | Benzodiazepine                                          |
| Aceh Mental Hospital          | Aceh     | Tertiary provincial mental hospital           | Individual psychotherapy, symptomatic pharmacotherapy                                                        | Methamphetamine                                         |
| Duren Sawit Regional Hospital | Jakarta  | Tertiary regional general hospital            | Individual psychotherapy, symptomatic pharmacotherapy, opioid substitution therapy (buprenorphine, naloxone) | Opioid                                                  |
| Karisma Foundation            | Jakarta  | Rehabilitation center                         | Individual and group peer counselling                                                                        | Methamphetamine, opioid                                 |
| Kapeta Foundation             | Banten   | Rehabilitation center                         | Individual and group peer counselling                                                                        | Methamphetamine, benzodiazepine, synthetic cannabinoids |
| Kios Atma Jaya                | Jakarta  | Rehabilitation center and regional HIV clinic | Individual psychotherapy, group peer counselling, outreach program                                           | Opioid                                                  |
| Puskesmas Jatinegara          | Jakarta  | Primary health care                           | Counselling, symptomatic pharmacotherapy, methadone maintenance therapy                                      | Heroin                                                  |
| Puskesmas Gambir              | Jakarta  | Primary health care                           | Counselling, symptomatic pharmacotherapy, methadone maintenance therapy                                      | Heroin                                                  |

Counselling focuses on education and giving advice.

Symptomatic pharmacotherapy gives medication for helping patients with specific psychopathologies.

Psychotherapy aims to help a person identify and change troubling emotions, thoughts, and behaviour.

Table 2. Outcome and measurement

| Outcome                           | Measurement                                                   | Data for analysis                                                                                                                                                     | Type and score range                                                                          | Hypothesis for intervention (vs control)          | Assessment time point         |                                            |                               |                               |
|-----------------------------------|---------------------------------------------------------------|-----------------------------------------------------------------------------------------------------------------------------------------------------------------------|-----------------------------------------------------------------------------------------------|---------------------------------------------------|-------------------------------|--------------------------------------------|-------------------------------|-------------------------------|
|                                   |                                                               |                                                                                                                                                                       |                                                                                               |                                                   | T1                            | T2                                         | T3                            | T4                            |
| <b>Primary outcome</b>            |                                                               |                                                                                                                                                                       |                                                                                               |                                                   |                               |                                            |                               |                               |
| Abstinence from primary substance | Timeline followback (TLFB) for the past 28 days               | Number of days being abstinent from primary substance divided by 28 (%).                                                                                              | Continuous, 0 (no use) to 100 (used every day).                                               | Higher                                            | ✓<br><input type="checkbox"/> | ✓ <input type="checkbox"/><br><sup>a</sup> | ✓<br><input type="checkbox"/> | ✓<br><input type="checkbox"/> |
| <b>Secondary outcomes</b>         |                                                               |                                                                                                                                                                       |                                                                                               |                                                   |                               |                                            |                               |                               |
| Addiction severity                | Addiction Severity Index (ASI)                                | 7 composite scores: medical, employment, alcohol use, drug use, legal, family/social, and psychiatric status. Each composite score calculated using standard formula. | Continuous, 0 (no problems) to 1 (severe problems).                                           | Lower                                             | ✓<br><input type="checkbox"/> | ✓ <input type="checkbox"/>                 | ✓<br><input type="checkbox"/> | ✓<br><input type="checkbox"/> |
| Health-related quality of life    | EuroQol-5D (EQ-5D-5L)                                         | Health utility score, calculated from 5 items on mobility, self-care, usual activities, pain/discomfort and anxiety/depression, using Indonesian value set.           | Continuous, -0.865 (impaired health) to 1 (full health).                                      | Higher                                            | ✓<br><input type="checkbox"/> | ✓ <input type="checkbox"/>                 | ✓<br><input type="checkbox"/> | ✓<br><input type="checkbox"/> |
| Motivation to change              | University of Rhode Island Change Assessment (URICA)          | Action stage subscale, sum of 8 items.                                                                                                                                | Continuous, 8 (not active in behavioural change) to 40 (highly active in behavioural change). | Higher                                            | ✓<br><input type="checkbox"/> | ✓ <input type="checkbox"/>                 | ✓<br><input type="checkbox"/> | ✓<br><input type="checkbox"/> |
| Coping                            | Brief-Coping Orientation to Problems Experienced (Brief COPE) | Sum of substance use coping (2 items)                                                                                                                                 | Continuous, 2 (low substance use coping) to 8 (high substance use coping)                     | Lower                                             | ✓<br><input type="checkbox"/> | ✓ <input type="checkbox"/>                 | ✓<br><input type="checkbox"/> | ✓<br><input type="checkbox"/> |
| Psychiatric symptoms              | Symptom Checklist-90 Revised (SCL-90-R)                       | Global Severity Index (GSI), average of 90 items.                                                                                                                     | Continuous, 0 (no symptoms) to 4 (severe symptoms).                                           | Lower                                             | ✓<br><input type="checkbox"/> | ✓ <input type="checkbox"/>                 | ✓<br><input type="checkbox"/> | ✓<br><input type="checkbox"/> |
| Cognitive function                | Rey Auditory Verbal Learning Test (RAVLT)                     | 3 test results; immediate, learning, and recalling.                                                                                                                   | Continuous, 0 (low functioning) to 15 (high functioning).                                     | Higher                                            | ✓<br><input type="checkbox"/> | ✓ <input type="checkbox"/>                 | ✓<br><input type="checkbox"/> | ✓<br><input type="checkbox"/> |
| Internalised stigma               | Internalized Stigma of Mental Illness (ISMI)                  | Sum of 4 subscales: alienation, stereotype endorsement, social withdrawal, and stigma resistances.                                                                    | Continuous, 24 (low internalised stigma) to 96 (high internalised stigma)                     | Lower                                             | ✓<br><input type="checkbox"/> | ✓ <input type="checkbox"/>                 | ✓<br><input type="checkbox"/> | ✓<br><input type="checkbox"/> |
| <b>Implementation outcomes</b>    |                                                               |                                                                                                                                                                       |                                                                                               |                                                   |                               |                                            |                               |                               |
| Retention in treatment            | Self-reporting for the past 3 months                          | Coded as 'retained' if they had therapeutic contacts in at least 75% of the planned number of therapeutic contacts.                                                   | Categorical, 'retained' = 1, 'not retained' = 0.                                              | More 'retained'                                   | ✓ <input type="checkbox"/>    | ✓<br><input type="checkbox"/>              | ✓<br><input type="checkbox"/> | ✓<br><input type="checkbox"/> |
| Treatment satisfaction            | Client Satisfaction Questionnaire-3 (CSQ-3)                   | Sum of 3 items.                                                                                                                                                       | Continuous, 4 (not satisfied) to 12 (satisfied).                                              | Higher                                            | ✓ <input type="checkbox"/>    |                                            |                               |                               |
| Group cohesion                    | Group Therapy Experience Scale (GTES)                         | Sum of 16 items.                                                                                                                                                      | Continuous, 16 (poor cohesion) to 80 (great cohesion).                                        | Not applicable: measured only in intervention arm | ✓ <input type="checkbox"/>    |                                            |                               |                               |



---

<sup>a</sup> Objective validation by urine drug test for 8 substances: alcohol, amphetamine, morphine, cannabinoids, methamphetamine, benzodiazepine, cocaine, synthetic cannabinoids

For peer review only

1  
2  
3  
4  
5  
6  
7  
8  
9  
10  
11  
12  
13  
14  
15  
16  
17  
18  
19  
20  
21  
22  
23  
24  
25  
26  
27  
28  
29  
30  
31  
32  
33  
34  
35  
36  
37  
38  
39  
40  
41  
42  
43  
44  
45  
46  
47

For peer review only

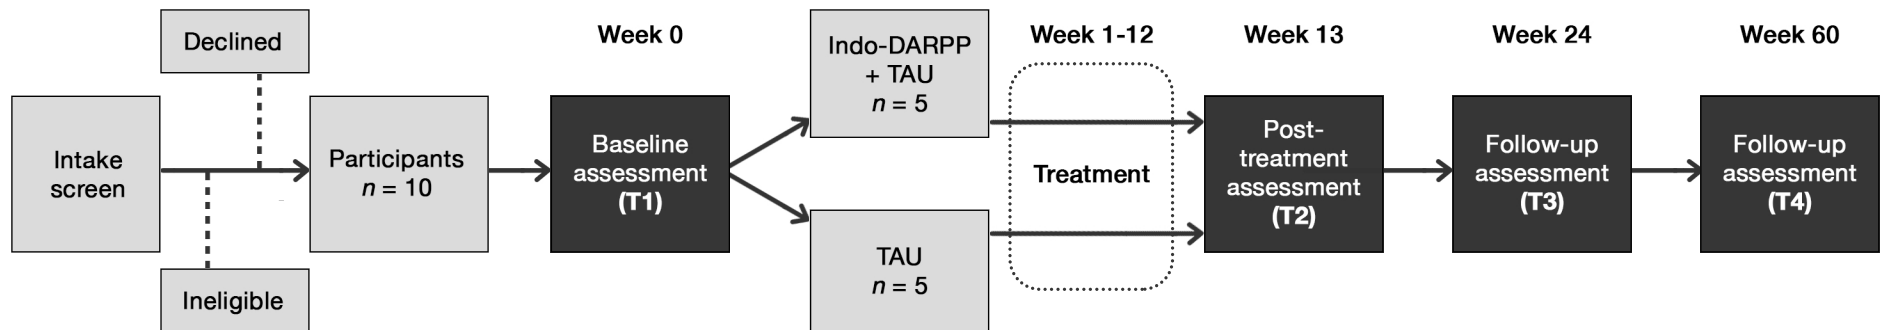

1  
2  
3  
4  
5  
6  
7  
8  
9  
10  
11  
12  
13  
14  
15  
16  
17  
18  
19  
20  
21  
22  
23  
24  
25  
26  
27  
28  
29  
30  
31  
32  
33  
34  
35  
36  
37  
38  
39  
40  
41  
42  
43  
44  
45  
46  
47

Weeks

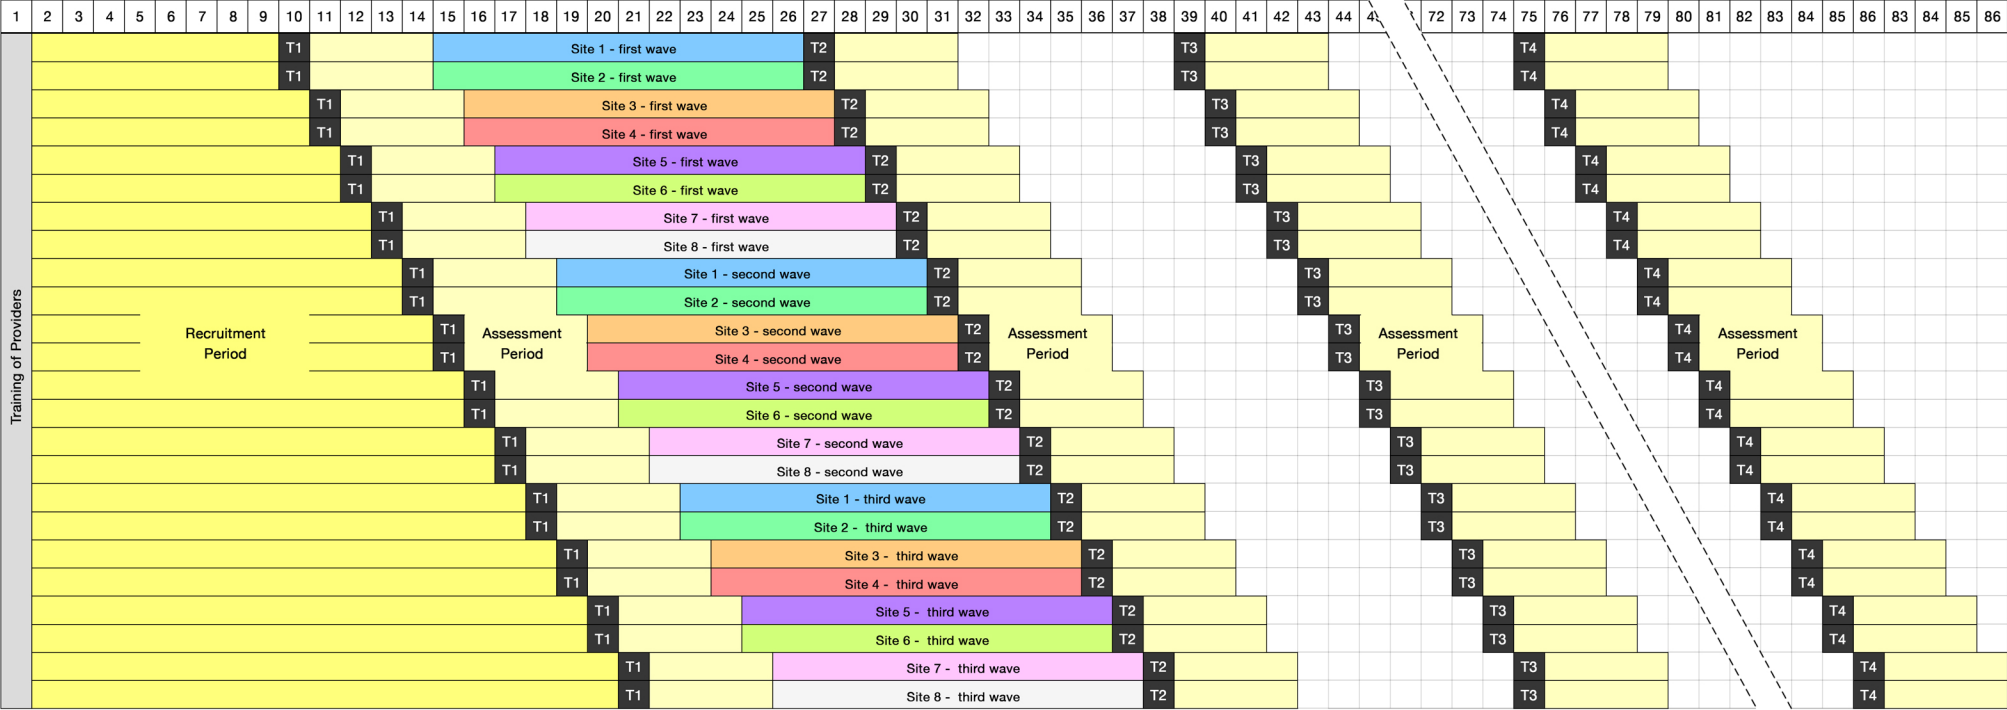

# Reporting checklist for protocol of a clinical trial.

Based on the SPIRIT guidelines.

## Instructions to authors

Complete this checklist by entering the page numbers from your manuscript where readers will find each of the items listed below.

Your article may not currently address all the items on the checklist. Please modify your text to include the missing information. If you are certain that an item does not apply, please write "n/a" and provide a short explanation.

Upload your completed checklist as an extra file when you submit to a journal.

In your methods section, say that you used the SPIRIT reporting guidelines, and cite them as:

Chan A-W, Tetzlaff JM, Gøtzsche PC, Altman DG, Mann H, Berlin J, Dickersin K, Hróbjartsson A, Schulz KF, Parulekar WR, Krleža-Jerić K, Laupacis A, Moher D. SPIRIT 2013 Explanation and Elaboration: Guidance for protocols of clinical trials. *BMJ*. 2013;346:e7586

|                                   | Reporting Item                                                                                                                  | Page Number                                       |
|-----------------------------------|---------------------------------------------------------------------------------------------------------------------------------|---------------------------------------------------|
| <b>Administrative information</b> |                                                                                                                                 |                                                   |
| Title                             | <a href="#">#1</a> Descriptive title identifying the study design, population, interventions, and, if applicable, trial acronym | 1                                                 |
| Trial registration                | <a href="#">#2a</a> Trial identifier and registry name. If not yet registered, name of intended registry                        | 4, 23                                             |
| Trial registration: data set      | <a href="#">#2b</a> All items from the World Health Organization Trial Registration Data Set                                    | n/a, trial already registered as described in 2a. |
| Protocol version                  | <a href="#">#3</a> Date and version identifier                                                                                  | 23                                                |
| Funding                           | <a href="#">#4</a> Sources and types of financial, material, and other support                                                  | 26-27                                             |
| Roles and                         | <a href="#">#5a</a> Names, affiliations, and roles of protocol                                                                  | 26                                                |

|    |                      |                     |                                                    |                           |
|----|----------------------|---------------------|----------------------------------------------------|---------------------------|
| 1  | responsibilities:    |                     | contributors                                       |                           |
| 2  | contributorship      |                     |                                                    |                           |
| 3  |                      |                     |                                                    |                           |
| 4  | Roles and            | <a href="#">#5b</a> | Name and contact information for the trial         | n/a, no trial sponsor.    |
| 5  | responsibilities:    |                     | sponsor                                            |                           |
| 6  | sponsor contact      |                     |                                                    |                           |
| 7  | information          |                     |                                                    |                           |
| 8  |                      |                     |                                                    |                           |
| 9  |                      |                     |                                                    |                           |
| 10 |                      |                     |                                                    |                           |
| 11 | Roles and            | <a href="#">#5c</a> | Role of study sponsor and funders, if any, in      | n/a, no involvement of    |
| 12 | responsibilities:    |                     | study design; collection, management,              | funders in the study      |
| 13 | sponsor and funder   |                     | analysis, and interpretation of data; writing of   | design.                   |
| 14 |                      |                     | the report; and the decision to submit the         |                           |
| 15 |                      |                     | report for publication, including whether they     |                           |
| 16 |                      |                     | will have ultimate authority over any of these     |                           |
| 17 |                      |                     | activities                                         |                           |
| 18 |                      |                     |                                                    |                           |
| 19 | Roles and            | <a href="#">#5d</a> | Composition, roles, and responsibilities of the    | n/a, no direct            |
| 20 | responsibilities:    |                     | coordinating centre, steering committee,           | intervention in the study |
| 21 | committees           |                     | endpoint adjudication committee, data              | design by the host        |
| 22 |                      |                     | management team, and other individuals or          | universities.             |
| 23 |                      |                     | groups overseeing the trial, if applicable (see    |                           |
| 24 |                      |                     | Item 21a for data monitoring committee)            |                           |
| 25 |                      |                     |                                                    |                           |
| 26 |                      |                     |                                                    |                           |
| 27 |                      |                     |                                                    |                           |
| 28 |                      |                     |                                                    |                           |
| 29 |                      |                     |                                                    |                           |
| 30 |                      |                     |                                                    |                           |
| 31 |                      |                     |                                                    |                           |
| 32 |                      |                     |                                                    |                           |
| 33 | <b>Introduction</b>  |                     |                                                    |                           |
| 34 |                      |                     |                                                    |                           |
| 35 | Background and       | <a href="#">#6a</a> | Description of research question and               | 6-9                       |
| 36 | rationale            |                     | justification for undertaking the trial, including |                           |
| 37 |                      |                     | summary of relevant studies (published and         |                           |
| 38 |                      |                     | unpublished) examining benefits and harms          |                           |
| 39 |                      |                     | for each intervention                              |                           |
| 40 |                      |                     |                                                    |                           |
| 41 |                      |                     |                                                    |                           |
| 42 |                      |                     |                                                    |                           |
| 43 |                      |                     |                                                    |                           |
| 44 | Background and       | <a href="#">#6b</a> | Explanation for choice of comparators              | 15                        |
| 45 | rationale: choice of |                     |                                                    |                           |
| 46 | comparators          |                     |                                                    |                           |
| 47 |                      |                     |                                                    |                           |
| 48 |                      |                     |                                                    |                           |
| 49 | Objectives           | <a href="#">#7</a>  | Specific objectives or hypotheses                  | 9                         |
| 50 |                      |                     |                                                    |                           |
| 51 |                      |                     |                                                    |                           |
| 52 | Trial design         | <a href="#">#8</a>  | Description of trial design including type of      | 9-10                      |
| 53 |                      |                     | trial (eg, parallel group, crossover, factorial,   |                           |
| 54 |                      |                     | single group), allocation ratio, and framework     |                           |
| 55 |                      |                     | (eg, superiority, equivalence, non-inferiority,    |                           |
| 56 |                      |                     | exploratory)                                       |                           |
| 57 |                      |                     |                                                    |                           |
| 58 |                      |                     |                                                    |                           |
| 59 |                      |                     |                                                    |                           |
| 60 |                      |                     |                                                    |                           |

1 **Methods:**

2 **Participants,**

3 **interventions, and**

4 **outcomes**

|    |                      |                      |                                                       |
|----|----------------------|----------------------|-------------------------------------------------------|
| 5  |                      |                      |                                                       |
| 6  |                      |                      |                                                       |
| 7  |                      |                      |                                                       |
| 8  | Study setting        | <a href="#">#9</a>   | Description of study settings (eg, community          |
| 9  |                      |                      | clinic, academic hospital) and list of countries      |
| 10 |                      |                      | where data will be collected. Reference to            |
| 11 |                      |                      | where list of study sites can be obtained             |
| 12 |                      |                      |                                                       |
| 13 |                      |                      |                                                       |
| 14 |                      |                      |                                                       |
| 15 | Eligibility criteria | <a href="#">#10</a>  | Inclusion and exclusion criteria for                  |
| 16 |                      |                      | participants. If applicable, eligibility criteria for |
| 17 |                      |                      | study centres and individuals who will                |
| 18 |                      |                      | perform the interventions (eg, surgeons,              |
| 19 |                      |                      | psychotherapists)                                     |
| 20 |                      |                      |                                                       |
| 21 |                      |                      |                                                       |
| 22 |                      |                      |                                                       |
| 23 |                      |                      |                                                       |
| 24 | Interventions:       | <a href="#">#11a</a> | Interventions for each group with sufficient          |
| 25 | description          |                      | detail to allow replication, including how and        |
| 26 |                      |                      | when they will be administered                        |
| 27 |                      |                      |                                                       |
| 28 |                      |                      |                                                       |
| 29 | Interventions:       | <a href="#">#11b</a> | Criteria for discontinuing or modifying               |
| 30 | modifications        |                      | allocated interventions for a given trial             |
| 31 |                      |                      | participant (eg, drug dose change in                  |
| 32 |                      |                      | response to harms, participant request, or            |
| 33 |                      |                      | improving / worsening disease)                        |
| 34 |                      |                      |                                                       |
| 35 |                      |                      |                                                       |
| 36 |                      |                      |                                                       |
| 37 |                      |                      |                                                       |
| 38 | Interventions:       | <a href="#">#11c</a> | Strategies to improve adherence to                    |
| 39 | adherence            |                      | intervention protocols, and any procedures            |
| 40 |                      |                      | for monitoring adherence (eg, drug tablet             |
| 41 |                      |                      | return; laboratory tests)                             |
| 42 |                      |                      |                                                       |
| 43 |                      |                      |                                                       |
| 44 |                      |                      |                                                       |
| 45 | Interventions:       | <a href="#">#11d</a> | Relevant concomitant care and interventions           |
| 46 | concomitant care     |                      | that are permitted or prohibited during the           |
| 47 |                      |                      | trial                                                 |
| 48 |                      |                      |                                                       |
| 49 |                      |                      |                                                       |
| 50 |                      |                      |                                                       |
| 51 | Outcomes             | <a href="#">#12</a>  | Primary, secondary, and other outcomes,               |
| 52 |                      |                      | including the specific measurement variable           |
| 53 |                      |                      | (eg, systolic blood pressure), analysis metric        |
| 54 |                      |                      | (eg, change from baseline, final value, time to       |
| 55 |                      |                      | event), method of aggregation (eg, median,            |
| 56 |                      |                      | proportion), and time point for each outcome.         |
| 57 |                      |                      |                                                       |
| 58 |                      |                      |                                                       |
| 59 |                      |                      |                                                       |
| 60 |                      |                      |                                                       |

1 Explanation of the clinical relevance of  
 2 chosen efficacy and harm outcomes is  
 3 strongly recommended  
 4

5  
 6 Participant timeline [#13](#) Time schedule of enrolment, interventions 10, 19, 26  
 7 (including any run-ins and washouts),  
 8 assessments, and visits for participants. A  
 9 schematic diagram is highly recommended  
 10 (see Figure)  
 11  
 12

13  
 14 Sample size [#14](#) Estimated number of participants needed to 20  
 15 achieve study objectives and how it was  
 16 determined, including clinical and statistical  
 17 assumptions supporting any sample size  
 18 calculations  
 19  
 20  
 21  
 22

23 Recruitment [#15](#) Strategies for achieving adequate participant 11  
 24 enrolment to reach target sample size  
 25  
 26

27 **Methods:**  
 28 **Assignment of**  
 29 **interventions (for**  
 30 **controlled trials)**  
 31  
 32  
 33

34 Allocation: [#16a](#) Method of generating the allocation 12  
 35 sequence  
 36 generation  
 37 (eg, computer-generated random  
 38 numbers), and list of any factors for  
 39 stratification. To reduce predictability of a  
 40 random sequence, details of any planned  
 41 restriction (eg, blocking) should be provided  
 42 in a separate document that is unavailable to  
 43 those who enrol participants or assign  
 44 interventions  
 45  
 46  
 47  
 48

49 Allocation [#16b](#) Mechanism of implementing the allocation 12  
 50 concealment  
 51 mechanism  
 52 (eg, central telephone; sequentially  
 53 numbered, opaque, sealed envelopes),  
 54 describing any steps to conceal the  
 55 sequence until interventions are assigned  
 56  
 57

58 Allocation: [#16c](#) Who will generate the allocation sequence, 12  
 59  
 60



|    |                        |                      |                                                |                         |
|----|------------------------|----------------------|------------------------------------------------|-------------------------|
| 1  | implementation         |                      | who will enrol participants, and who will      |                         |
| 2  |                        |                      | assign participants to interventions           |                         |
| 3  |                        |                      |                                                |                         |
| 4  | Blinding (masking)     | <a href="#">#17a</a> | Who will be blinded after assignment to        | 12, 19                  |
| 5  |                        |                      | interventions (eg, trial participants, care    |                         |
| 6  |                        |                      | providers, outcome assessors, data             |                         |
| 7  |                        |                      | analysts), and how                             |                         |
| 8  |                        |                      |                                                |                         |
| 9  |                        |                      |                                                |                         |
| 10 |                        |                      |                                                |                         |
| 11 | Blinding (masking):    | <a href="#">#17b</a> | If blinded, circumstances under which          | n/a, only assessors are |
| 12 | emergency              |                      | unblinding is permissible, and procedure for   | blinded                 |
| 13 | unblinding             |                      | revealing a participant's allocated            |                         |
| 14 |                        |                      | intervention during the trial                  |                         |
| 15 |                        |                      |                                                |                         |
| 16 |                        |                      |                                                |                         |
| 17 |                        |                      |                                                |                         |
| 18 | <b>Methods: Data</b>   |                      |                                                |                         |
| 19 | <b>collection,</b>     |                      |                                                |                         |
| 20 | <b>management, and</b> |                      |                                                |                         |
| 21 | <b>analysis</b>        |                      |                                                |                         |
| 22 |                        |                      |                                                |                         |
| 23 |                        |                      |                                                |                         |
| 24 |                        |                      |                                                |                         |
| 25 | Data collection plan   | <a href="#">#18a</a> | Plans for assessment and collection of         | 15-19                   |
| 26 |                        |                      | outcome, baseline, and other trial data,       |                         |
| 27 |                        |                      | including any related processes to promote     |                         |
| 28 |                        |                      | data quality (eg, duplicate measurements,      |                         |
| 29 |                        |                      | training of assessors) and a description of    |                         |
| 30 |                        |                      | study instruments (eg, questionnaires,         |                         |
| 31 |                        |                      | laboratory tests) along with their reliability |                         |
| 32 |                        |                      | and validity, if known. Reference to where     |                         |
| 33 |                        |                      | data collection forms can be found, if not in  |                         |
| 34 |                        |                      | the protocol                                   |                         |
| 35 |                        |                      |                                                |                         |
| 36 |                        |                      |                                                |                         |
| 37 |                        |                      |                                                |                         |
| 38 |                        |                      |                                                |                         |
| 39 |                        |                      |                                                |                         |
| 40 |                        |                      |                                                |                         |
| 41 |                        |                      |                                                |                         |
| 42 | Data collection plan:  | <a href="#">#18b</a> | Plans to promote participant retention and     | 19, 22-23               |
| 43 | retention              |                      | complete follow-up, including list of any      |                         |
| 44 |                        |                      | outcome data to be collected for participants  |                         |
| 45 |                        |                      | who discontinue or deviate from intervention   |                         |
| 46 |                        |                      | protocols                                      |                         |
| 47 |                        |                      |                                                |                         |
| 48 |                        |                      |                                                |                         |
| 49 |                        |                      |                                                |                         |
| 50 |                        |                      |                                                |                         |
| 51 | Data management        | <a href="#">#19</a>  | Plans for data entry, coding, security, and    | 23                      |
| 52 |                        |                      | storage, including any related processes to    |                         |
| 53 |                        |                      | promote data quality (eg, double data entry;   |                         |
| 54 |                        |                      | range checks for data values). Reference to    |                         |
| 55 |                        |                      | where details of data management               |                         |
| 56 |                        |                      | procedures can be found, if not in the         |                         |
| 57 |                        |                      |                                                |                         |
| 58 |                        |                      |                                                |                         |
| 59 |                        |                      |                                                |                         |
| 60 |                        |                      |                                                |                         |

|    |                        |                                                                     |                         |
|----|------------------------|---------------------------------------------------------------------|-------------------------|
| 1  |                        | protocol                                                            |                         |
| 2  |                        |                                                                     |                         |
| 3  | Statistics: outcomes   | <a href="#">#20a</a> Statistical methods for analysing primary and  | 20-22                   |
| 4  |                        | secondary outcomes. Reference to where                              |                         |
| 5  |                        | other details of the statistical analysis plan                      |                         |
| 6  |                        | can be found, if not in the protocol                                |                         |
| 7  |                        |                                                                     |                         |
| 8  |                        |                                                                     |                         |
| 9  |                        |                                                                     |                         |
| 10 | Statistics: additional | <a href="#">#20b</a> Methods for any additional analyses (eg,       | 21-22                   |
| 11 | analyses               | subgroup and adjusted analyses)                                     |                         |
| 12 |                        |                                                                     |                         |
| 13 |                        |                                                                     |                         |
| 14 | Statistics: analysis   | <a href="#">#20c</a> Definition of analysis population relating to  | 21                      |
| 15 | population and         | protocol non-adherence (eg, as randomised                           |                         |
| 16 | missing data           | analysis), and any statistical methods to                           |                         |
| 17 |                        | handle missing data (eg, multiple imputation)                       |                         |
| 18 |                        |                                                                     |                         |
| 19 |                        |                                                                     |                         |
| 20 |                        |                                                                     |                         |
| 21 | <b>Methods:</b>        |                                                                     |                         |
| 22 | <b>Monitoring</b>      |                                                                     |                         |
| 23 |                        |                                                                     |                         |
| 24 |                        |                                                                     |                         |
| 25 | Data monitoring:       | <a href="#">#21a</a> Composition of data monitoring committee       | 23, DMC will not be     |
| 26 | formal committee       | (DMC); summary of its role and reporting                            | convened as the         |
| 27 |                        | structure; statement of whether it is                               | intervention involves a |
| 28 |                        | independent from the sponsor and competing                          | short-term              |
| 29 |                        | interests; and reference to where further                           | psychotherapy with      |
| 30 |                        | details about its charter can be found, if not in                   | known minimal risk.     |
| 31 |                        | the protocol. Alternatively, an explanation of                      |                         |
| 32 |                        | why a DMC is not needed                                             |                         |
| 33 |                        |                                                                     |                         |
| 34 |                        |                                                                     |                         |
| 35 |                        |                                                                     |                         |
| 36 |                        |                                                                     |                         |
| 37 |                        |                                                                     |                         |
| 38 | Data monitoring:       | <a href="#">#21b</a> Description of any interim analyses and        | 23, interim analysis is |
| 39 | interim analysis       | stopping guidelines, including who will have                        | not planned due to the  |
| 40 |                        | access to these interim results and make the                        | short duration of       |
| 41 |                        | final decision to terminate the trial                               | intervention.           |
| 42 |                        |                                                                     |                         |
| 43 |                        |                                                                     |                         |
| 44 |                        |                                                                     |                         |
| 45 | Harms                  | <a href="#">#22</a> Plans for collecting, assessing, reporting, and | 22-23                   |
| 46 |                        | managing solicited and spontaneously                                |                         |
| 47 |                        | reported adverse events and other                                   |                         |
| 48 |                        | unintended effects of trial interventions or trial                  |                         |
| 49 |                        | conduct                                                             |                         |
| 50 |                        |                                                                     |                         |
| 51 |                        |                                                                     |                         |
| 52 |                        |                                                                     |                         |
| 53 |                        |                                                                     |                         |
| 54 | Auditing               | <a href="#">#23</a> Frequency and procedures for auditing trial     | 23, there will be no    |
| 55 |                        | conduct, if any, and whether the process will                       | auditing process by     |
| 56 |                        | be independent from investigators and the                           | independent             |
| 57 |                        | sponsor                                                             | investigators.          |
| 58 |                        |                                                                     |                         |
| 59 |                        |                                                                     |                         |
| 60 |                        |                                                                     |                         |

## Ethics and dissemination

|                                      |                      |                                                                                                                                                                                                                                    |                                                                                           |
|--------------------------------------|----------------------|------------------------------------------------------------------------------------------------------------------------------------------------------------------------------------------------------------------------------------|-------------------------------------------------------------------------------------------|
| Research ethics approval             | <a href="#">#24</a>  | Plans for seeking research ethics committee / institutional review board (REC / IRB) approval                                                                                                                                      | 23, 28                                                                                    |
| Protocol amendments                  | <a href="#">#25</a>  | Plans for communicating important protocol modifications (eg, changes to eligibility criteria, outcomes, analyses) to relevant parties (eg, investigators, REC / IRBs, trial participants, trial registries, journals, regulators) | 23                                                                                        |
| Consent or assent                    | <a href="#">#26a</a> | Who will obtain informed consent or assent from potential trial participants or authorised surrogates, and how (see Item 32)                                                                                                       | 23                                                                                        |
| Consent or assent: ancillary studies | <a href="#">#26b</a> | Additional consent provisions for collection and use of participant data and biological specimens in ancillary studies, if applicable                                                                                              | 23                                                                                        |
| Confidentiality                      | <a href="#">#27</a>  | How personal information about potential and enrolled participants will be collected, shared, and maintained in order to protect confidentiality before, during, and after the trial                                               | 23                                                                                        |
| Declaration of interests             | <a href="#">#28</a>  | Financial and other competing interests for principal investigators for the overall trial and each study site                                                                                                                      | 27                                                                                        |
| Data access                          | <a href="#">#29</a>  | Statement of who will have access to the final trial dataset, and disclosure of contractual agreements that limit such access for investigators                                                                                    | 28                                                                                        |
| Ancillary and post trial care        | <a href="#">#30</a>  | Provisions, if any, for ancillary and post-trial care, and for compensation to those who suffer harm from trial participation                                                                                                      | 15, CBT intervention will be made available for control group after the end of the study. |

|    |                       |                      |                                                   |        |
|----|-----------------------|----------------------|---------------------------------------------------|--------|
| 1  | Dissemination         | <a href="#">#31a</a> | Plans for investigators and sponsor to            | 23     |
| 2  | policy: trial results |                      | communicate trial results to participants,        |        |
| 3  |                       |                      | healthcare professionals, the public, and         |        |
| 4  |                       |                      | other relevant groups (eg, via publication,       |        |
| 5  |                       |                      | reporting in results databases, or other data     |        |
| 6  |                       |                      | sharing arrangements), including any              |        |
| 7  |                       |                      | publication restrictions                          |        |
| 8  |                       |                      |                                                   |        |
| 9  |                       |                      |                                                   |        |
| 10 |                       |                      |                                                   |        |
| 11 |                       |                      |                                                   |        |
| 12 |                       |                      |                                                   |        |
| 13 | Dissemination         | <a href="#">#31b</a> | Authorship eligibility guidelines and any         | 26-27  |
| 14 | policy: authorship    |                      | intended use of professional writers              |        |
| 15 |                       |                      |                                                   |        |
| 16 |                       |                      |                                                   |        |
| 17 | Dissemination         | <a href="#">#31c</a> | Plans, if any, for granting public access to the  | 28     |
| 18 | policy: reproducible  |                      | full protocol, participant-level dataset, and     |        |
| 19 | research              |                      | statistical code                                  |        |
| 20 |                       |                      |                                                   |        |
| 21 |                       |                      |                                                   |        |
| 22 | <b>Appendices</b>     |                      |                                                   |        |
| 23 |                       |                      |                                                   |        |
| 24 |                       |                      |                                                   |        |
| 25 | Informed consent      | <a href="#">#32</a>  | Model consent form and other related              | 11, 23 |
| 26 | materials             |                      | documentation given to participants and           |        |
| 27 |                       |                      | authorised surrogates                             |        |
| 28 |                       |                      |                                                   |        |
| 29 |                       |                      |                                                   |        |
| 30 | Biological            | <a href="#">#33</a>  | Plans for collection, laboratory evaluation,      | 16     |
| 31 | specimens             |                      | and storage of biological specimens for           |        |
| 32 |                       |                      | genetic or molecular analysis in the current      |        |
| 33 |                       |                      | trial and for future use in ancillary studies, if |        |
| 34 |                       |                      | applicable                                        |        |
| 35 |                       |                      |                                                   |        |
| 36 |                       |                      |                                                   |        |
| 37 |                       |                      |                                                   |        |
| 38 |                       |                      |                                                   |        |

#### Notes:

- 2b: n/a, trial already registered as described in 2a.
- 5b: n/a, no trial sponsor.
- 5c: n/a, no involvement of funders in the study design.
- 5d: n/a, no direct intervention in the study design by the host universities.
- 17b: n/a, only assessors are blinded
- 21a: 23, DMC will not be convened as the intervention involves a short-term psychotherapy with known minimal risk.
- 21b: 23, interim analysis is not planned due to the short duration of intervention.

- 1
- 2
- 3
- 4
- 5
- 6
- 7
- 8
- 9
- 10
- 11
- 12
- 13
- 14
- 15
- 16
- 17
- 18
- 19
- 20
- 21
- 22
- 23
- 24
- 25
- 26
- 27
- 28
- 29
- 30
- 31
- 32
- 33
- 34
- 35
- 36
- 37
- 38
- 39
- 40
- 41
- 42
- 43
- 44
- 45
- 46
- 47
- 48
- 49
- 50
- 51
- 52
- 53
- 54
- 55
- 56
- 57
- 58
- 59
- 60
- 23: 23, there will be no auditing process by independent investigators.
  - 30: 15, CBT intervention will be made available for control group after the end of the study. The SPIRIT Explanation and Elaboration paper is distributed under the terms of the Creative Commons Attribution License CC-BY-NC. This checklist was completed on 15. February 2021 using <https://www.goodreports.org/>, a tool made by the [EQUATOR Network](#) in collaboration with [Penelope.ai](#)

For peer review only

## Supplementary file 2

**Research Participation Consent Form**

Title of the Research:

Effectiveness of a cognitive behavioral therapy for drug use disorders in Indonesia: A randomized controlled trial

(Collaboration research between the Faculty of Medicine, University of Indonesia and Kyoto University)

An explanation has been given which includes the following discussion :

- |                                                               |                                                                                                                  |
|---------------------------------------------------------------|------------------------------------------------------------------------------------------------------------------|
| 1. Research Title                                             | 18. General management of drug addiction patients outside of research interventions                              |
| 2. Research Clearance                                         | 19. Follow up management after the research ends                                                                 |
| 3. Research institutes and researchers                        | 20. Report of the participant's genetic information                                                              |
| 4. Research purposes                                          | 21. Compensation for illness related to research and invasive procedures                                         |
| 5. Research procedure                                         | 22. Secondary research data for other institutions                                                               |
| 6. Research period                                            | 23. Samples and participant information related to invasive procedures                                           |
| 7. Inclusion Criteria                                         | 24. Name, position, and affiliation of the person in charge of managing data and information related to research |
| 8. Risks, benefits, and side effects                          | 25. CBT group participant commitments and drop out possibility of research participation                         |
| 9. Right to refuse and drop out                               |                                                                                                                  |
| 10. Voluntary participation and risk of involvement           |                                                                                                                  |
| 11. Research data publication                                 |                                                                                                                  |
| 12. How to access research-related materials for participants |                                                                                                                  |
| 13. Privacy of personal data                                  |                                                                                                                  |
| 14. Research data storage                                     |                                                                                                                  |
| 15. Research funds and conflicts of interest                  |                                                                                                                  |
| 16. Researcher contact list                                   |                                                                                                                  |
| 17. Remuneration for participants                             |                                                                                                                  |

Explanations have been given according to the explanation sheet, and consent has been obtained voluntarily.

Date of consent : \_\_\_\_ / \_\_\_\_ / 20 \_\_\_\_

Researcher's affiliation : \_\_\_\_\_

Researcher's Name :

Researcher's Signature :

Acknowledged by:

1. Dean of the Faculty Medicine, University Indonesia
2. Director of the *Center for South East Asian Studies, Kyoto University*

## Supplementary file 2

**CBT-Group Participation Consent Form**

I, the undersigned, hereby acknowledge, consent and agree to fulfill the following matters during my participation in CBT group therapy, in order to ensure the safe and secure continuation of the program:

1. I will not divulge information about other participants in the group to external parties without the consent of the parties concerned.
2. I will not record audio, video, or take camera pictures without the permission of the parties concerned and the research team.
3. I will not use drugs during the CBT session.
4. I will not divulge links (URL), ID, and passwords for online meetings in the Zoom application to external parties, without the approval of the research team.
5. I will not harass, say offensive words related to ethnicity, religion and race, or commit acts of violence for any reason to any party related to the research, whether other participants or the research team.

If I infringe the points of the agreement above, I will be given 1 (one) warning. If I do not show any improvement after being warned, or infringe it for the second time, or it is deemed that my participation will interfere with the continuation of CBT therapy in the future, I have no objection to my participation being unilaterally terminated.

I, the undersigned, hereby declare that I have understood the explanation given and agree to my participation in the research mentioned above. In my behavior after being warned, or infringe it for the second time, or it is deemed that my participation will interfere with the continuation of CBT therapy in the future, I have no objection to my participation being unilaterally terminated.

Date of Consent : \_\_\_\_ / \_\_\_\_\_ / 20 \_\_\_\_

Name : \_\_\_\_\_

Signature : \_\_\_\_\_

## Supplementary file 2

**Urine Test Informed Consent**

Title of Research:

Effectiveness of a cognitive behavioral therapy for drug use disorders in Indonesia: A randomized controlled trial

(Collaboration research between the Faculty of Medicine, University of Indonesia and Kyoto University)

An explanation has been given which includes the following discussion:

1. Purpose of the urine sampling
2. Urine test procedure
3. Analysis of urine test results data and maintaining data confidentiality

Explanations have been given according to the explanation sheet, and consent has been obtained voluntarily.

I, the undersigned, declare that I

**Agree / do not agree**

\*please circle one of these options above

...to provide the urine sample to be tested for the research team, and I have acknowledged and understood the purposes, procedures and data analysis as described previously.

Date of consent : \_\_\_\_ / \_\_\_\_\_ / 20 \_\_\_\_

Name : \_\_\_\_\_

Signature : \_\_\_\_\_



## Supplementary file 2

**Withdrawal of Informed Consent for Urine Test**

Title of the research:

Effectiveness of a cognitive behavioral therapy for drug use disorders in Indonesia: A randomized controlled trial

(Collaboration research between the Faculty of Medicine, University of Indonesia and Kyoto University)

I, the undersigned, hereby wish to withdraw my prior consent to participate in the urinary test for this research by signing this form.

Withdrawal Date : \_\_\_\_ / \_\_\_\_\_ / 20 \_\_\_\_

Participant's Name : \_\_\_\_\_

Participant's Signature : \_\_\_\_\_

## Supplementary file 3

**Table of contents of Indo-DARPP (English translation)**

| <b>Chapter no.</b> | <b>Chapter title</b>                                                                                                                                                                                                                                                                                              | <b>Page no.</b>                               |
|--------------------|-------------------------------------------------------------------------------------------------------------------------------------------------------------------------------------------------------------------------------------------------------------------------------------------------------------------|-----------------------------------------------|
| Preface            | The beginning of Indo-DARPP<br>The purpose of SMARPP                                                                                                                                                                                                                                                              | x<br>xii                                      |
| 1                  | <b>What is addiction?</b><br>Seven characteristics of addiction                                                                                                                                                                                                                                                   | <b>5</b><br>5                                 |
| 2                  | <b>Why should we stop using drugs?</b><br>Why drug use is a problem<br>Drugs and behavior disorder<br>Advantages and disadvantages of using drugs and stop using drugs<br>Stages of change<br>The urge to continue or to stop using drugs                                                                         | <b>11</b><br>11<br>13<br>16<br>17<br>19       |
| 3                  | <b>Recovery stage of drug addiction - First year</b><br>Stage (1) Stress phase (0-14 days)<br>Stage (2) 'Honeymoon' phase (15-90 days)<br>Stage (3) The 'wall' phase (91-180 days)<br>Stage (4) Adjustment phase (181-270 days)<br>Stage (5) Resolution phase (271-365 days)<br>Understanding our "wall" symptoms | <b>21</b><br>21<br>22<br>23<br>24<br>24<br>25 |
| 4                  | <b>"Triggers" and "cravings"</b><br>The urge to use drugs<br>Let's take action!<br>Stopping the urge to use drugs                                                                                                                                                                                                 | <b>28</b><br>28<br>31<br>32                   |
| 5                  | <b>Triggers around you</b><br>External triggers<br>Let's take action!                                                                                                                                                                                                                                             | <b>36</b><br>36<br>37                         |
| 6                  | <b>Trigger inside us</b><br>Internal trigger<br>High risk conditions: hungry, angry, lonely, tired (HALT)                                                                                                                                                                                                         | <b>42</b><br>42<br>44                         |
| 7                  | <b>Prevention of harmful behavior</b><br>Distant and self-isolating behavior<br>Drug dreams                                                                                                                                                                                                                       | <b>48</b><br>48<br>51                         |
| 8                  | <b>Let's make schedule of our daily activities</b><br>Why is scheduling so important?<br>Make your schedule and practice!<br>Calendars and marks of achievement                                                                                                                                                   | <b>54</b><br>54<br>57<br>60                   |
| 9                  | <b>Adverse effects of drugs on the brain and body</b><br>Effects of drugs on the brain<br>Effects of drugs on the body<br>Dangerous viral infections: Hepatitis C and HIV                                                                                                                                         | <b>62</b><br>62<br>65<br>67                   |
| 10                 | <b>Drug-induced psychiatric and behavioral disorders</b><br>What are psychiatric disorders?<br>If a person with psychiatric disorder addicted to drugs<br>Drug-induced psychiatric and behavioral disorders<br>Testimonials of people with comorbidities                                                          | <b>72</b><br>72<br>73<br>73<br>74             |

|    |                                                                                                                                                                                                                                                                        |                                         |
|----|------------------------------------------------------------------------------------------------------------------------------------------------------------------------------------------------------------------------------------------------------------------------|-----------------------------------------|
| 11 | <b>Amphetamine-type stimulants</b><br>Effects of amphetamine on the brain and its symptoms<br>The dangers of using amphetamine<br>Prognosis of amphetamine addiction                                                                                                   | <b>78</b><br>79<br>81<br>83             |
| 12 | <b>Opioid: Heroin, morphine and maintenance therapy</b><br>Types of opioids & how do they work<br>Symptoms and side effects of opioid usage<br>Effects on opioid use<br>Treatments & therapy for opioid addiction<br>Opioid addiction prognosis                        | <b>84</b><br>84<br>85<br>86<br>88<br>90 |
| 13 | <b>Benzodiazepine and other legal drugs</b><br>Medical use of benzodiazepines<br>The dangers of benzodiazepines<br>Other legal drugs use<br>Particular problems in benzodiazepine addiction<br>Responsible use of benzodiazepines                                      | <b>92</b><br>92<br>93<br>94<br>96<br>99 |
| 14 | <b>Alcohol use</b><br>Alcohol use in Indonesia<br>Triggers on alcohol drinking                                                                                                                                                                                         | <b>100</b><br>100<br>102                |
| 15 | <b>The dangers of alcohol on brain and body</b><br>Effects of alcohol on the brain<br>Effects of alcohol on the body<br>Liver disease<br>Heart and vascular disease                                                                                                    | <b>107</b><br>107<br>111<br>112<br>115  |
| 16 | <b>Three pillars to stop drinking alcohol</b><br>Three pillars on stop drinking alcohol<br>What are anti-alcohol drugs?<br>Types of anti-alcohol drugs                                                                                                                 | <b>118</b><br>118<br>119<br>121         |
| 17 | <b>Does marijuana not cause addiction?</b><br>Getting to know about marijuana<br>Marijuana use in Indonesia<br>Effects of marijuana on the body                                                                                                                        | <b>127</b><br>127<br>128<br>129         |
| 18 | <b>New psychoactive substances (NPS)</b><br>Types and characteristics of NPS<br>Effects of NPS on the brain and body                                                                                                                                                   | <b>132</b><br>132<br>135                |
| 19 | <b>Abstinence or relapse risk in the future</b><br>The chance of alcohol-free after treatment<br>The chance & duration of getting relapse after treatment<br>Effects of participation in self help groups on prognosis<br>Prognosis of people with substance addiction | <b>139</b><br>139<br>140<br>142<br>143  |
| 20 | <b>Preventing relapse</b><br>What is relapse?<br>What is addictive behavior?<br>What is addictive thought?<br>The accumulation of negative emotions                                                                                                                    | <b>147</b><br>147<br>148<br>150<br>150  |
| 21 | <b>Reasons a person experiencing relapse</b><br>What causes relapse?<br>Due to chance or influences of others?<br>Because of some extraordinary events, misfortunes or disasters<br>Because of the desire to achieve something                                         | <b>153</b><br>153<br>154<br>154<br>155  |

|    |                                                                      |            |
|----|----------------------------------------------------------------------|------------|
|    | Because of emotions: depression, anger, lonely, fright               | 155        |
|    | Because of perception that the addiction problems was already solved | 156        |
|    | Testing own selves                                                   | 157        |
|    | Celebrating something                                                | 157        |
| 22 | <b>Characters towards recovery: trust, honesty, friendships</b>      | <b>160</b> |
|    | Trust                                                                | 160        |
|    | Honesty                                                              | 162        |
|    | Creating new friendships                                             | 164        |
| 23 | <b>Negative relationships with other people</b>                      | <b>166</b> |
|    | Relationship without appreciation                                    | 166        |
|    | Controlling relationship (1)                                         | 168        |
|    | Controlling relationship (2)                                         | 169        |
|    | Relationship that hurts you and the drugs recovery phase             | 170        |
|    | Value yourself                                                       | 171        |
| 24 | <b>Sexual behavior, eating disorders and holidays</b>                | <b>173</b> |
|    | Sexual behavior during the recovery phase                            | 173        |
|    | Eating disorders                                                     | 175        |
|    | Getting through long holidays                                        | 177        |
| 25 | <b>Preventing relapse: becoming wiser</b>                            | <b>181</b> |
|    | Recognizing triggers and creating schedule                           | 183        |
| 26 | <b>How is your relapse cycle?</b>                                    | <b>189</b> |

# BMJ Open

## Relapse prevention group therapy via video-conferencing for substance use disorder: protocol for a multicentre randomised controlled trial in Indonesia

|                                 |                                                                                                                                                                                                                                                                                                                                                                                                                                                                                                                                                                                                                                                                                                                                                                                                                                                                                                                                                                                                         |
|---------------------------------|---------------------------------------------------------------------------------------------------------------------------------------------------------------------------------------------------------------------------------------------------------------------------------------------------------------------------------------------------------------------------------------------------------------------------------------------------------------------------------------------------------------------------------------------------------------------------------------------------------------------------------------------------------------------------------------------------------------------------------------------------------------------------------------------------------------------------------------------------------------------------------------------------------------------------------------------------------------------------------------------------------|
| Journal:                        | <i>BMJ Open</i>                                                                                                                                                                                                                                                                                                                                                                                                                                                                                                                                                                                                                                                                                                                                                                                                                                                                                                                                                                                         |
| Manuscript ID                   | bmjopen-2021-050259.R2                                                                                                                                                                                                                                                                                                                                                                                                                                                                                                                                                                                                                                                                                                                                                                                                                                                                                                                                                                                  |
| Article Type:                   | Protocol                                                                                                                                                                                                                                                                                                                                                                                                                                                                                                                                                                                                                                                                                                                                                                                                                                                                                                                                                                                                |
| Date Submitted by the Author:   | 10-Aug-2021                                                                                                                                                                                                                                                                                                                                                                                                                                                                                                                                                                                                                                                                                                                                                                                                                                                                                                                                                                                             |
| Complete List of Authors:       | Yamada, Chika; Kyoto University, Department of Environmental Coexistence, Center for Southeast Asian Studies<br>Siste, Kristiana; Universitas Indonesia, Department of Psychiatry, Faculty of Medicine<br>Hanafi, Enjeline; Universitas Indonesia, Department of Psychiatry, Faculty of Medicine,<br>Ophinni, Youdiil; Ragon Institute<br>Beatrice, Evania; Universitas Indonesia, Department of Psychiatry, Faculty of Medicine<br>Rafelia, Vania; Universitas Indonesia, Department of Psychiatry, Faculty of Medicine<br>Alison, Peter; Universitas Indonesia, Department of Psychiatry, Faculty of Medicine<br>Prabowo, Albert; Universitas Indonesia, Department of Psychiatry, Faculty of Medicine<br>Shinozaki, Tomohiro; Tokyo University of Science, Department of Information and Computer Technology<br>Matsumoto, Toshihiko; NCNP, Department of Drug Dependence Research<br>Sakamoto, Ryota; Kyoto University, Department of Environmental Coexistence, Center for Southeast Asian Studies |
| <b>Primary Subject Heading</b>: | Addiction                                                                                                                                                                                                                                                                                                                                                                                                                                                                                                                                                                                                                                                                                                                                                                                                                                                                                                                                                                                               |
| Secondary Subject Heading:      | Addiction, Global health, Mental health, Evidence based practice                                                                                                                                                                                                                                                                                                                                                                                                                                                                                                                                                                                                                                                                                                                                                                                                                                                                                                                                        |
| Keywords:                       | Substance misuse < PSYCHIATRY, Telemedicine < BIOTECHNOLOGY & BIOINFORMATICS, PSYCHIATRY, Clinical trials < THERAPEUTICS                                                                                                                                                                                                                                                                                                                                                                                                                                                                                                                                                                                                                                                                                                                                                                                                                                                                                |
|                                 |                                                                                                                                                                                                                                                                                                                                                                                                                                                                                                                                                                                                                                                                                                                                                                                                                                                                                                                                                                                                         |

SCHOLARONE™  
Manuscripts



I, the Submitting Author has the right to grant and does grant on behalf of all authors of the Work (as defined in the below author licence), an exclusive licence and/or a non-exclusive licence for contributions from authors who are: i) UK Crown employees; ii) where BMJ has agreed a CC-BY licence shall apply, and/or iii) in accordance with the terms applicable for US Federal Government officers or employees acting as part of their official duties; on a worldwide, perpetual, irrevocable, royalty-free basis to BMJ Publishing Group Ltd ("BMJ") its licensees and where the relevant Journal is co-owned by BMJ to the co-owners of the Journal, to publish the Work in this journal and any other BMJ products and to exploit all rights, as set out in our [licence](#).

The Submitting Author accepts and understands that any supply made under these terms is made by BMJ to the Submitting Author unless you are acting as an employee on behalf of your employer or a postgraduate student of an affiliated institution which is paying any applicable article publishing charge ("APC") for Open Access articles. Where the Submitting Author wishes to make the Work available on an Open Access basis (and intends to pay the relevant APC), the terms of reuse of such Open Access shall be governed by a Creative Commons licence – details of these licences and which [Creative Commons](#) licence will apply to this Work are set out in our licence referred to above.

Other than as permitted in any relevant BMJ Author's Self Archiving Policies, I confirm this Work has not been accepted for publication elsewhere, is not being considered for publication elsewhere and does not duplicate material already published. I confirm all authors consent to publication of this Work and authorise the granting of this licence.

1  
2  
3 **1 Title**  
4

5 2 Relapse prevention group therapy via video-conferencing for substance use disorder: protocol for  
6  
7 3 a multicentre randomised controlled trial in Indonesia  
8  
9

10 4  
11  
12 **5 Author names and affiliations**  
13

14 6 Chika Yamada <sup>1\*</sup>, Kristiana Siste <sup>2\*</sup>, Enjeline Hanafi <sup>2\*</sup>, Youdiil Ophinni <sup>3\*</sup>, Evania Beatrice <sup>2</sup>,  
15  
16 7 Vania Rafelia <sup>2</sup>, Peter Alison <sup>2</sup>, Albert Prabowo <sup>2</sup>, Tomohiro Shinozaki <sup>4</sup>, Toshihiko Matsumoto <sup>5</sup>,  
17  
18 8 Ryota Sakamoto <sup>1</sup>  
19  
20

21 9  
22  
23 10 <sup>1</sup> Department of Environmental Coexistence, Center for Southeast Asian Studies, Kyoto  
24  
25 11 University, Kyoto, Japan  
26  
27

28 12 <sup>2</sup> Department of Psychiatry, Faculty of Medicine, Universitas Indonesia, Jakarta, Indonesia  
29

30 13 <sup>3</sup> Ragon Institute of MGH, MIT and Harvard, Cambridge, USA  
31

32 14 <sup>4</sup> Department of Information and Computer Technology, Faculty of Engineering, Tokyo  
33  
34 15 University of Science, Tokyo, Japan  
35  
36

37 16 <sup>5</sup> Department of Drug Dependence Research, National Center of Neurology and Psychiatry,  
38  
39 17 Tokyo, Japan  
40  
41

42 18 \*These authors contributed equally to this work.  
43  
44

45 19

46  
47 **20 E-mail address**  
48

49 21 Chika Yamada: [chika128@cseas.kyoto-u.ac.jp](mailto:chika128@cseas.kyoto-u.ac.jp)  
50

51 22 Kristiana Siste: [ksiste@yahoo.com](mailto:ksiste@yahoo.com)  
52

53 23 Enjeline Hanafi: [enjelinehanafi@gmail.com](mailto:enjelinehanafi@gmail.com)  
54  
55  
56  
57  
58  
59  
60

1  
2  
3 24 Youdiil Ophinni: yophinni@mgh.harvard.edu  
4

5 25 Albert Prabowo: albert.lorenz@yahoo.com  
6

7  
8 26 Evania Beatrice: btricevania@gmail.com  
9

10 27 Vania Rafelia: vaniarafelia@gmail.com  
11

12 28 Peter Alison: p\_ter\_alison@hotmail.com  
13

14 29 Tomohiro Shinozaki: shinozaki@rs.tus.ac.jp  
15

16 30 Toshihiko Matsumoto: tmatsu@ncnp.go.jp  
17

18 31 Ryota Sakamoto: sakamoto65@cseas.kyoto-u.ac.jp  
19  
20  
21  
22  
23

24 33 **Corresponding author**

25  
26 34 Chika Yamada  
27

28 35 E-mail address: chika128@cseas.kyoto-u.ac.jp  
29

30 36 Postal address: 46 Yoshidashimoadachicho, Sakyo Ward, Kyoto, 606-8304, Japan  
31  
32  
33  
34

35 38 Abstract: 300 words  
36

37 39 Main text: 5,656 words  
38  
39  
40  
41  
42  
43  
44  
45  
46  
47  
48  
49  
50  
51  
52  
53  
54  
55  
56  
57  
58  
59  
60



## 40 Abstract

41 **Background:** Substance use disorder (SUD) is a leading contributor to the global burden of  
42 disease. In Indonesia, the availability of formal treatment for SUD falls short of the targeted  
43 coverage. A standardised therapeutic option for SUD with potential for widespread  
44 implementation is required, yet evidence-based data in the country are scarce. In this study, we  
45 developed a cognitive behavioural therapy (CBT)-based group telemedicine model, and will  
46 investigate effectiveness and implementability in a multicentre randomised controlled trial (RCT).

47 **Methods:** A total of 220 participants will be recruited from the social networks of eight sites in  
48 Indonesia: three hospitals, two primary healthcare centres, and three rehabilitation centres. The  
49 intervention arm will participate in a relapse prevention programme called the Indonesia Drug  
50 Addiction Relapse Prevention Programme, a newly developed 12-week module based on CBT and  
51 motivational interviewing constructed in the Indonesian context. The programme will be delivered  
52 by a healthcare provider and a peer counsellor in a group therapy setting via video-conferencing,  
53 as a supplement to participants' usual treatments. The control arm will continue treatment as usual.  
54 The primary outcome will be the percentage increase in days of abstinence from the primarily used  
55 substance in the past 28 days. Secondary outcomes will include addiction severity, quality of life,  
56 motivation to change, psychiatric symptoms, cognitive function, coping, and internalised stigma.  
57 Assessments will be performed at baseline (week 0); post-treatment (week 13); and three and 12  
58 months post-treatment completion (weeks 24 and 60). Retention, participant satisfaction, and cost-  
59 effectiveness will be assessed as the implementation outcomes.

60 **Ethics and dissemination:** The study protocol was reviewed and approved by the Ethics  
61 Committees of Universitas Indonesia and Kyoto University. The results will be disseminated via

1  
2  
3 62 academic journals and international conferences. Depending on trial outcomes, the treatment  
4  
5 63 programme will be advocated for adoption as a formal healthcare-based approach for SUD.  
6  
7

8 64 **Trial registration number:** UMIN000042186  
9

10  
11 65 **Keywords:** *substance use disorder, telemedicine, cognitive behavioural therapy, relapse*  
12  
13 66 *prevention, motivational interviewing, Indonesia, peer counsellor*  
14  
15

16 67  
17  
18  
19  
20  
21  
22  
23  
24  
25  
26  
27  
28  
29  
30  
31  
32  
33  
34  
35  
36  
37  
38  
39  
40  
41  
42  
43  
44  
45  
46  
47  
48  
49  
50  
51  
52  
53  
54  
55  
56  
57  
58  
59  
60

1  
2  
3 **68 Strengths and limitations of this study**  
4  
5

- 6 **69** ● The proposed study will be the first to establish high-quality evidence for a cognitive  
7  
8 **70** behavioural therapy (CBT)-based relapse prevention programme for substance use  
9  
10 **71** disorder (SUD) in Indonesia.  
11  
12  
13 **72** ● Telemedicine enables far-reaching, nationwide participation, connecting participants from  
14  
15 **73** across the nation with providers in major cities.  
16  
17 **74** ● A successful outcome may produce a new SUD treatment module in Indonesia and pave  
18  
19 the way for its adoption by national guidelines.  
20 **75**  
21  
22 **76** ● Study limitations include risk of recall and social desirability bias, heterogeneous control  
23  
24 **77** conditions, and possible variability in treatment provision.  
25  
26  
27 **78**

## 79 Introduction

80 Substance use disorder (SUD) is characterised by the inability to control the use of  
81 psychoactive substances, such as alcohol and psychotropic drugs, which disrupt daily living. SUD  
82 remains a significant and growing health problem worldwide. According to the 2016 Global  
83 Burden of Disease (GBD) survey, SUD contributed to 131 million disability-adjusted life years  
84 (DALYs), or 5.5% of all DALYs,<sup>1</sup> and its prevalence has been increasing since the 1990s.<sup>2</sup> While  
85 substance use itself is more widespread in high-income countries (HICs), low- and middle-income  
86 countries (LMICs) had disproportionately high SUD mortality rates. The absolute mortality rate  
87 due to SUD was greatest in LMICs with large populations,<sup>3</sup> and people with economic  
88 disadvantages were more likely to develop SUD.<sup>4</sup> The Movement for Global Mental Health and  
89 the World Health Organization have found substantial treatment gaps in LMICs. For instance, the  
90 number of individuals with SUD far exceed the availability of formal treatment services.<sup>5-7</sup> While  
91 these numbers do not take traditional care into account, it is still concerning that only 1% of  
92 individuals with SUD in LMICs have reported receiving government-standardised treatment.<sup>8</sup>

93 In Indonesia, the world's third most populous LMIC, government statistics have estimated  
94 the prevalence of drug use to be 1.8% (3.3 million residents), with the most used substance being  
95 marijuana (68%), followed by amphetamine-type stimulants (ATS, 42%), opioids (38%) and  
96 sedatives (35%).<sup>9,10</sup> While injecting drug use (IDU) decreased by 80% between 2002 to 2016,<sup>10</sup>  
97 unprescribed use of psychoactive medications like benzodiazepines has become significant.<sup>11</sup>  
98 Similar to other Muslim majority countries,<sup>12</sup> alcohol consumption is comparatively low in  
99 Indonesia, with alcohol use disorder being prevalent only among 0.8% residents in 2016, much  
100 lower than the overall rate in Southeast Asia (3.9%).<sup>13</sup> However, new psychoactive substances  
101 (NPS) have entered the country in the last decade.<sup>14</sup> Moreover, the COVID-19 pandemic may

1  
2  
3 102 further complicate the SUD situation in Indonesia, as has been observed in other countries.<sup>15</sup> For  
4  
5 103 instance, unpublished data from our co-author (KS) revealed that since the pandemic began in  
6  
7 104 early April 2020, both drug and alcohol use have increased in Indonesia by up to 2.5%. Increased  
8  
9 105 drug use might have been influenced by lockdown isolation, socio-economic issues due to  
10  
11 106 unemployment, and severe psychological burden.

12  
13  
14  
15 107 In Indonesia, formal mental health providers and facilities are severely lacking; in a nation  
16  
17 108 of 267 million people, only 773 psychiatrists (0.32/100,000 people) are employed—the second  
18  
19 109 lowest proportion in Southeast Asia<sup>16</sup>—across hospitals with psychiatric care, half of which are  
20  
21 110 located in the capital island of Java.<sup>17</sup> Among the ~1700 government-run primary healthcare  
22  
23 111 centres (abbreviated as *Puskesmas* in Indonesian), only a fifth actively provide mental health  
24  
25 112 care.<sup>17,18</sup> Current formal treatment options for SUD include one-on-one supportive psychotherapy,  
26  
27 113 symptomatic pharmacotherapy, peer counselling, and opioid substitution. Methadone maintenance  
28  
29 114 therapy (MMT) has been available in Puskesmas since 2006, but as of 2012, its coverage was only  
30  
31 115 5%,<sup>19</sup> due to methadone cost, reliance on subsidisation, lack of programme sustainability,<sup>20</sup> and  
32  
33 116 the tendency to incarcerate patients under the 'war on drugs' policy.<sup>19,21</sup> The three-month retention  
34  
35 117 rate of MMT was only 60-74%.<sup>22,23</sup> Psychiatric comorbidities, and lower quality of life, are  
36  
37 118 common among MMT recipients.<sup>24</sup> Most concerning, insufficient formal treatment coverage and  
38  
39 119 the lack of standardised care for SUD have prompted policymakers to enact punitive  
40  
41 120 criminalisation practices, which are even more stringent under the current administration, instead  
42  
43 121 of a comprehensive mental health care approach.<sup>25,26</sup>

44  
45 122 Behavioural therapies in many forms are commonly administered for SUD, the most  
46  
47 123 popular method being cognitive behavioural therapy (CBT). There is strong evidence supporting  
48  
49 124 the efficacy of CBT in treating SUD. A meta-analysis reported a moderate overall effect size ( $d =$

1  
2  
3 125 0.45) of CBT treatments, with outcomes such as self-reported abstinence, drug-free urine at  
4  
5 126 treatment exit, and increased retention in therapy.<sup>27,28</sup> CBT strategies include: (a) contingency  
6  
7 127 management (CM),<sup>29</sup> which introduces rewards for abstinence, (b) motivational interviewing (MI),  
8  
9 128 which explores and resolves ambivalence,<sup>30,31</sup> (c) relapse prevention (RP), which helps participants  
10  
11 129 to identify high-risk triggers and prevent cravings, or (d) combinations thereof.<sup>32</sup> Therapy can be  
12  
13  
14 130 delivered individually or in groups; the latter has reportedly increased adherence and self-  
15  
16 131 disclosure, and decreased the treatment duration by 40%.<sup>33,34</sup> CBT (particularly MI and RP) is  
17  
18 132 relatively low-cost and can be delivered by non-specialists, making it adaptable to and beneficial  
19  
20 133 in settings with limited formal mental health professionals.<sup>35,36</sup> In LMICs, while ample RCTs have  
21  
22 134 supported CBT's efficacy in reducing alcohol use,<sup>37,38</sup> evidence for treating drug use disorders is  
23  
24 135 limited, with only five RCTs published so far.<sup>39-43</sup> Among these, three were inpatient-based, even  
25  
26 136 though SUD management mandates sustainable outpatient care in community settings.

30  
31 137       Telemedicine has the potential to improve SUD treatment coverage in Indonesia. Internet  
32  
33 138 communication overcomes the geographical barriers of the Indonesian archipelago, and saves time  
34  
35 139 as well as transportation costs for both patients and providers, both in remote areas where health  
36  
37 140 services are sparse,<sup>44</sup> and in major cities with heavy traffic, such as Jakarta.<sup>45</sup> Privacy is also better  
38  
39 141 ensured online as opposed to in visiting clinics, where there is a greater risk of inappropriate  
40  
41 142 disclosure of SUD diagnoses, which is one of the most stigmatised health conditions.<sup>46</sup>  
42  
43 143 Synchronous telemedicine via live video feed connects participants in real-time, improving rapport  
44  
45 144 and potentially adherence, as compared to asynchronous telemedicine (e.g. through text messages  
46  
47 145 or web application). Video-conferencing has been effectively used in SUD treatment<sup>47-52</sup>; however,  
48  
49 146 recent systematic reviews<sup>53-58</sup> have revealed three gaps in research: (1) previous reports have only  
50  
51 147 focused on alcohol and opioid use,<sup>47,50-52</sup> (2) group therapy was investigated by only one small-

1  
2  
3 148 scale pilot RCT,<sup>51</sup> and (3) no studies have been conducted in LMICs. This latter gap is particularly  
4  
5 149 relevant because the use of internet devices has been rapidly expanding in LMICs, including  
6  
7  
8 150 Indonesia. Smartphone users accounted for 74% of the Indonesian population in 2019, possibly  
9  
10 151 reaching 89% by 2025.<sup>59</sup> The COVID-19 pandemic has further elevated telemedicine from an  
11  
12 152 accessory to a necessity, including for psychiatric care.<sup>60</sup> Its accessibility and acceptance among  
13  
14  
15 153 SUD patients, as shown in a recent survey,<sup>61</sup> may potentially sustain telemedicine as the 'new  
16  
17 154 normal' even in the post-pandemic world.<sup>62,63</sup>

19  
20 155         Given the above challenges and opportunities, we propose a clinical trial to evaluate a  
21  
22 156 relapse prevention telemedicine programme for SUD in Indonesia. We have developed a new 12-  
23  
24 157 week CBT-based group therapy called *the Indonesia Drug Addiction Relapse Prevention*  
25  
26 158 *Programme* (Indo-DARPP), which will be delivered via video conference (tele-Indo-DARPP).  
27  
28  
29 159 The primary objective will be to evaluate the effectiveness of tele-Indo-DARPP in addition to  
30  
31 160 treatment as usual (TAU) towards increasing abstinence from primarily used substances, as  
32  
33 161 compared to the effectiveness of TAU only. The secondary objectives will be to assess impacts on  
34  
35  
36 162 quality of life, motivation to change, psychological symptoms, cognitive function, coping, and  
37  
38 163 internalised stigma. Retention, participant satisfaction, and group cohesion will be assessed as  
39  
40 164 implementation outcomes, and cost-effectiveness analyses will be conducted to inform health  
41  
42  
43 165 policy investments.

44  
45 166

## 48 167 **METHODS**

### 51 168 **Trial design**

1  
2  
3 169 This trial is a parallel-group, two-arm, assessor-blinded, multicentre randomised controlled  
4  
5 170 trial. The protocol adheres to the Standard Protocol Items: Recommendations for Interventional  
6  
7 171 Trials (SPIRIT) checklist (**Supplementary file 1**). We designed the study as a pragmatic type 1  
8  
9  
10 172 hybrid effectiveness-implementation trial,<sup>64</sup> which allows concurrent investigation of intervention  
11  
12 173 effectiveness as well as implementation in clinical practice, focusing on the former. After intake  
13  
14 174 screening, participants will undergo baseline assessment (T1) and be randomly allocated in a 1:1  
15  
16 175 ratio either to the intervention arm receiving tele-Indo-DARPP in addition to TAU, or the control  
17  
18 176 arm receiving TAU only. Treatment will be administered for 12 weeks, followed by a post-  
19  
20 177 treatment assessment (T2) at week 13, and follow-up assessments (T3) at week 24 and (T4) at  
21  
22 178 week 60 (**Figure 1**).

23  
24  
25  
26 179  
27  
28  
29 180 [Figure 1 here]  
30  
31

32 181  
33  
34

## 35 182 **Participants and settings**

36  
37  
38 183 Participants will be recruited across Indonesia via social networks of eight sites: two  
39  
40 184 primary health centres (Puskesmas), three referral hospitals, and three drug rehabilitation services  
41  
42 185 (**Table 1**). These facility types constitute the community-based treatment model for SUD in  
43  
44 186 Indonesia,<sup>65</sup> encompassing patients with diverse motivations for behavioural change, substance  
45  
46 187 use histories, comorbidities, and stages of treatment. Recruitment will be conducted via online  
47  
48 188 advertisements (i.e. on social networking services, group chat, website), and through consecutive  
49  
50 189 sampling by directly approaching current and former clients through outpatient services. Although  
51  
52 190 all targeted facilities are located in urban settings, the recruitment process will include social media  
53  
54  
55  
56  
57  
58  
59



1  
2  
3 191 services of each site, particularly rehabilitation centres, which have nationwide coverage. Hence,  
4  
5 192 we expect that participants will be recruited from anywhere in Indonesia, and will not be limited  
6  
7  
8 193 to the physical scope of each site.  
9

10 194 The services offered by each type of site vary. Puskesmas provide general primary care,  
11  
12 195 pharmacotherapy for cases without complications, and MMT. Referral hospitals provide  
13  
14 196 psychotherapy, pharmacotherapy, opioid substitution therapy using buprenorphine/naloxone, and  
15  
16 197 specialised care for cases with complications, such as severe psychiatric disorders. Rehabilitation  
17  
18 198 services provide long-term psychosocial care, typically in a mutual-aid group. Sites were selected  
19  
20 199 based on feasibility, client demographics, recruitment potential, and availability of providers.  
21  
22 200 While recruited participants may not be undergoing treatment at these sites at the time, facilitators  
23  
24 201 for tele-Indo-DARPP will be staff members of the respective sites: general practitioners in  
25  
26 202 Puskesmas, psychiatrists in referral hospitals, and counsellors in rehabilitation centres.  
27  
28  
29  
30  
31

32 203

33  
34 204 **[Insert Table 1 here]**  
35  
36

37 205

38  
39  
40 206 Inclusion criteria will be those who: 1) be aged 18-65 years old; 2) be diagnosed with  
41  
42 207 substance use disorder based on DSM-5; 3) have used primarily used substances for at least one  
43  
44 208 day in the past year; 4) have access to electronic devices (i.e. smartphone, mobile tablet, personal  
45  
46 209 computer) with internet connection; and 5) be proficient in Indonesian. Individuals who 1) have  
47  
48 210 severe comorbidities that hinders informed consent or group therapy participation, and 2) are  
49  
50 211 hospitalised or using residential care, will be excluded.  
51  
52  
53  
54  
55  
56  
57  
58  
59  
60

1  
2  
3 212 We set a broad inclusion criterion, i.e., substance use in the past one year, for two reasons.  
4  
5 213 First, proportional hazard models have showed that the probability of relapse remains high before  
6  
7 214 achieving one year of abstinence, and declines substantially only after 16 months.<sup>66,67</sup> Thus, it is  
8  
9 215 clinically important to examine treatment efficacy for people who have not achieved one-year  
10  
11 216 abstinence.<sup>67</sup> Second, in this pragmatic effectiveness study,<sup>68</sup> we designed eligibility criteria to  
12  
13 217 accurately represent the population encountered in real-world Indonesian clinical practice. Indeed,  
14  
15 218 patients treated at the collaborating clinical sites include those who have been abstinent for more  
16  
17 219 than one month but still experience cravings and a tendency to relapse.  
18  
19  
20  
21  
22  
23

## 24 221 **Recruitment**

25  
26  
27 222 Patient eligibility will be assessed by collaborating staff at the respective sites. Addiction  
28  
29 223 psychiatrists will conduct clinical assessments via video calls for those who have never been  
30  
31 224 diagnosed with SUD. The consent form in English is provided in **Supplementary File 2**. For urine  
32  
33 225 tests, explanations will be given immediately after post-treatment (T2) assessment, as anticipation  
34  
35 226 for urine tests may influence substance use behaviour. Consent to urine tests or absence thereof  
36  
37 227 will not affect study participation.  
38  
39  
40  
41  
42  
43

## 44 229 **Randomisation and blinding**

45  
46  
47 230 Depending on the study site, participants will be randomly allocated to either the  
48  
49 231 intervention (tele-Indo-DARPP + TAU) or the control (TAU only) arm. Each site will conduct two  
50  
51 232 or three waves of recruitment, with 10 participants in each wave. For each wave at a site, we will  
52  
53 233 randomly allocate five participants to either the intervention or control arm. All participants in  
54  
55  
56  
57  
58  
59  
60

1  
2  
3 234 each tele-Indo-DARPP group will belong to the same recruitment site. Allocation will be  
4  
5 235 performed using computer-generated random numbers by a researcher who will be blinded to the  
6  
7 236 participants' information, except for ID. Data will be collected by researchers who are blinded to  
8  
9  
10 237 participants' study conditions. Participants and treatment providers will not be blinded, as it would  
11  
12 238 not be possible given the psychotherapeutic nature of the intervention.  
13  
14

15 239

### 18 240 **Development of the Indo-DARPP**

19  
20 241 The Indo-DARPP is based on the Serigaya Methamphetamine Relapse Prevention Programme  
21  
22 242 (SMARPP), a face-to-face CBT-based group intervention developed by a co-author (TM) in  
23  
24 243 Japan,<sup>69</sup> which itself is based on the Matrix Model developed in the US.<sup>70</sup> It has demonstrated  
25  
26 244 efficacy in increasing abstinence duration, motivation to change, and participation in self-help  
27  
28 245 groups.<sup>71-73</sup> SMARPP is covered by the national insurance scheme and has been widely  
29  
30 246 implemented as a psychotherapy for SUD not only in psychiatric clinics, but also in primary  
31  
32 247 healthcare centres, rehabilitation centres, and probation offices in Japan. SMARPP has excellent  
33  
34 248 scalability as it is delivered through workbooks, and can be facilitated by non-specialists who have  
35  
36 249 received brief training.  
37  
38  
39  
40  
41

42 250 The contents of Indo-DARPP are based on the RP model, wherein participants are guided  
43  
44 251 to learn about high-risk situations for substance use, and coping strategies. Elements of MI are  
45  
46 252 incorporated in the earlier parts of the workbook in a form of open questions to assess participants'  
47  
48 253 ambivalence and motivation to change. The programme also includes psychoeducation on  
49  
50 254 substances, SUD, and common comorbidities. While CM could also be added, it increases cost  
51  
52 255 and may not be effective in the longer term;<sup>74</sup> thus, only MI and RP approaches will be utilised in  
53  
54  
55 256 this study. Adaptations from SMARPP were determined via focus group discussions involving  
56  
57  
58  
59  
60

1  
2  
3 257 Japanese researchers, and psychiatrists, general practitioners, and peer counsellors based in  
4  
5 258 Indonesia, all of whom have extensive experience ranging from 4 to 20 years in the addiction field.  
6  
7  
8 259 The substances discussed in the module are amphetamine-type stimulants, benzodiazepines, and  
9  
10 260 other prescribed medicines, opioids, marijuana, NPS, and alcohol. Indo-DARPP is designed to be  
11  
12 261 delivered in a small group format using a workbook (see **Supplementary File 3** for the table of  
13  
14 262 contents of the workbook). Sessions will be delivered by one facilitator, and one peer counsellor  
15  
16  
17 263 with lived experiences of SUD as co-facilitator.  
18  
19

20 264 A pilot test was conducted at Site 1, with nine SUD patients recruited for a 12-week tele-  
21  
22 265 Indo-DARPP to check content acceptability and feasibility of the online delivery format. Further  
23  
24 266 adjustments were made based on pilot results and patient feedback.  
25  
26

27 267  
28  
29

### 30 268 **Intervention via video conference: tele-Indo-DARPP**

31  
32

33 269 Tele-Indo-DARPP will be delivered as group therapy for 12 weeks in weekly 2-hour sessions  
34  
35 270 over the online video-conferencing application Zoom, with a maximum of five participants. The  
36  
37 271 research team will provide video conference links to participants and two providers. Participants  
38  
39 272 who agree to share their contact information will receive the links on an online group chat, while  
40  
41  
42 273 others will be notified via personal messages. Each Indo-DARPP session consists of three parts:  
43  
44 274 (1) ‘check-in’, where participants share history of substance use and craving in the past week, and  
45  
46 275 analyse high-risk situations and coping actions taken; (2) ‘today’s topic’, where providers guide  
47  
48 276 discussions of specific workbook chapters and participants complete exercises, and (3) ‘check-  
49  
50  
51 277 out’, where providers give summary and invite feedback, and participants anticipate triggers and  
52  
53 278 coping strategies for the following week.  
54  
55  
56  
57  
58  
59  
60

1  
2  
3 2794  
5  
6 **280 Providers of tele-Indo-DARPP**

7  
8  
9 281 At least two persons from each site will serve as facilitators, who meet either of the following  
10  
11 282 criteria: psychiatrists with at least a year of experience in treating patients with SUD; healthcare  
12  
13 283 providers with at least two years of experience in providing care for patients with SUD; or peer  
14  
15 284 counsellors with at least 2 years of involvement with any organisations providing services for  
16  
17 285 patients with SUD. The roles of facilitators are to: (1) lead and moderate Indo-DARPP sessions;  
18  
19 286 (2) elaborate on chapter contents; (3) manage participants to follow rules; (4) establish a safe and  
20  
21 287 warm environment; (5) provide consultation, including out-of-session; and (6) contact absent  
22  
23 288 participants to encourage attendance.

24  
25  
26  
27 289 Similarly, at least two persons from each site will serve as co-facilitators for the tele-Indo-  
28  
29 290 DARPP. Co-facilitators will be peer counsellors who have also experienced SUD and recovered,  
30  
31 291 with at least 6 months of involvement with any organisations providing services for patients with  
32  
33 292 SUD. The role of co-facilitators is to: (1) share personal experiences relevant to discussion topics,  
34  
35 293 (2) assist facilitators in ensuring a safe and warm environment, (3) provide general support to the  
36  
37 294 Indo-DARPP process, and (4) provide counsel, both in and out of sessions.

38  
39  
40  
41  
42 29543  
44  
45 **296 Training and supervision**

46  
47 297 Prior to recruitment, all providers will receive two full-day online training sessions on basic  
48  
49 298 knowledge of SUD treatment, Indo-DARPP content, principles of MI (e.g., empathy, reflective  
50  
51 299 listening, empowering affirmations), video demonstrations, hands-on role play, discussion of  
52  
53 300 difficult cases, and study-related quality control. Workbooks and manuals will be handed to all  
54  
55  
56  
57  
58  
59

1  
2  
3 301 providers, and close communication with the research team will be maintained via a WhatsApp  
4  
5 302 group chat throughout the research period. To maintain treatment fidelity and quality control,  
6  
7 303 during actual tele-Indo-DARPP sessions, addiction psychiatrists from the research team (KS and  
8  
9 304 EH) will randomly select and observe at least two sessions per Indo-DARPP group. Observations  
10  
11 305 will be conducted at each wave at each site, constituting 16.7% of all sessions, and will be reviewed  
12  
13 306 using a structured checklist.  
14  
15  
16  
17  
18  
19

307

### 308 **Control condition**

20  
21  
22  
23 309 Participants who received treatment before the study will continue to receive treatment as  
24  
25 310 usual, regardless of group allocation. TAU was chosen as the control condition because it is  
26  
27 311 expected to complement the existing treatment services for SUD at every level of care. The TAU  
28  
29 312 differs according to service location (**Table 1**). Individual psychotherapy is typically conducted  
30  
31 313 via in-person short consultations (~15 minutes) with clinical psychiatrists. Pharmacotherapy is  
32  
33 314 used to alleviate symptoms, by prescribing medications such as anxiolytics for conditions such as  
34  
35 315 anxiety. Patients undergoing MMT visit their sites almost every day to receive their daily doses,  
36  
37 316 while patients undergoing substitution therapy with buprenorphine with naloxone visit every week.  
38  
39 317 All participants will be able to continue any outpatient pharmacological treatment (e.g. MMT,  
40  
41 318 antidepressants) and psychotherapy (e.g. twelve-step group sessions).  
42  
43  
44  
45  
46  
47  
48

319

### 320 **Primary outcome**

321 **Abstinence from primarily used substance**

322

323

324

325

326

327

328

329

330

1  
2  
3 322 The primary outcome is the percentage of days of abstinence from the primarily used  
4  
5 323 substance, in the past 28 days. Percent days of abstinence have been shown to be sensitive to the  
6  
7 324 effects of CBT and are good predictors of SUD treatment follow-up.<sup>75</sup> Data on the use of primarily  
8  
9 325 used substances each day (measured in a yes/no format) for 28 days will be retrospectively  
10  
11 326 collected on a weekly basis using the timeline follow-up (TLFB) method (**Table 2**), which has  
12  
13 327 good validity and high test-retest reliability in measuring substance consumption.<sup>76,77</sup> The  
14  
15 328 participants will be asked to recount every week to reduce the risk of recall bias. The primarily  
16  
17 329 used substance refers to the most problematic substance for participants, which has driven them to  
18  
19 330 seek care at T1.

20  
21  
22  
23  
24 331 Urine samples will be collected to test for the presence of the primarily used substance  
25  
26 332 once at T2. Thresholds for a positive result are >100 ng/ml for ethyl glucuronide (alcohol), >300  
27  
28 333 ng/ml for amphetamine-type stimulants (i.e. d-methamphetamine and MDMA), >100 ng/ml for  
29  
30 334 diacetyl morphine (heroin), cocaine, and benzodiazepine, >50 ng/ml for synthetic cannabis (K2),  
31  
32 335 and > 25 ng/ml for tetrahydrocannabinol (marijuana). Urine tests in this study will only serve to  
33  
34 336 corroborate the data of self-reported substance use at the primary endpoint (T2), not as an objective  
35  
36 337 substitute of all self-reported substance use data at every time point. This was planned to improve  
37  
38 338 feasibility for participants and minimise drop-out due to the burden of data collection (urine test  
39  
40 339 needs in-person assessment, unlike all other measurements in this study), especially among  
41  
42 340 participants who reside in remote areas who are deemed to benefit the most from online therapy.

43  
44  
45  
46  
47 341

48  
49 342 [Table 2 here]

50  
51 343

52  
53  
54 344 **Secondary outcomes**

### 345 *Addiction severity*

346 The Addiction Severity Index (ASI) is the most widely used measure in the field of  
347 addiction.<sup>78</sup> Internal consistency, test-retest reliability, and scale independence of ASI to measure  
348 substance use have long been established.<sup>79,80</sup> The Treatnet ASI version 3.0 by the United Nations  
349 Office on Drugs and Crime (UNODC) will be used; the scale is available in Indonesian, and one  
350 addiction treatment centre in Indonesia was included in its development trial.<sup>81</sup>

### 351 *Health-related quality of life*

352 The five-level version of the five-dimensional EuroQoL (EQ-5D)<sup>82,83</sup> will be used to assess  
353 health-related quality of life (HRQoL), which has been used before for SUD patients with  
354 confirmed construct validity.<sup>84,85</sup> The total utility score will be obtained using the already  
355 established value set in Indonesia.<sup>86</sup>

### 356 *Motivation to change*

357 Motivation to change will be assessed by the Action subscale of the University of Rhode  
358 Island Change Assessment (URICA)<sup>87</sup> which has been shown to have good validity. Higher scores  
359 indicate that the person has committed to develop positive behavioural changes.<sup>88</sup>

### 360 *Coping*

361 Types of engaged stress coping will be assessed by the Brief Coping Orientations to  
362 Problems Experienced (Brief COPE),<sup>89</sup> which is commonly used for SUD patients.<sup>90</sup> Higher scores  
363 for specific types indicate that patients have adopted them more frequently.

### 364 *Psychiatric symptoms*

365 Psychiatric symptoms will be evaluated by the Symptom Checklist 90-R (SCL-90-R).<sup>91</sup> The  
366 Global Severity Index (GSI) will be used, which is widely used for measuring psychiatric  
367 symptoms among SUD patients.<sup>92</sup>



1  
2  
3 368 ***Cognitive function***  
4

5 369 Cognitive function will be assessed by the Rey Auditory Verbal Learning Test (RAVLT),<sup>93</sup>  
6  
7  
8 370 which is useful for diagnosing cognitive impairment as well as post-treatment improvement in  
9  
10 371 SUD patients.<sup>94,95</sup>  
11

12 372 ***Internalised stigma***  
13

14 373 Internalised stigma will be assessed using the Internalised Stigma of Mental Illness (ISMI)  
15  
16 374 scale.<sup>96</sup> The term ‘mental illness’ in the statements will be replaced with ‘substance addiction.’  
17  
18

19 375  
20

21 376 **Implementation outcomes**  
22

23  
24 377 ***Retention in treatment***  
25

26 378 Participants will be coded as ‘retained in treatment’ if they have had therapeutic contact,  
27  
28 379 including attending tele-Indo-DARPP and visiting any outpatient clinic for TAU, in at least 75%  
29  
30 380 of planned contacts in the previous 3 months.  
31  
32

33 381 ***Treatment satisfaction***  
34

35 382 The Client Satisfaction Questionnaire-3 (CSQ-3)<sup>97</sup> will be used, as it is commonly used for  
36  
37 383 treatment programs, including for SUD.<sup>98</sup>  
38  
39

40 384 ***Group cohesion***  
41

42 385 The Group Therapy Experience Scale (GTES) will be used to measure the level of group  
43  
44 386 cohesion and self-disclosure in group therapy, as implementation outcomes of tele-Indo-DARPP.<sup>99</sup>  
45  
46

47 387 ***Indo-DARPP attendance***  
48

49 388 Attendance of each session will be recorded by the facilitator.  
50

51 389 ***Cost effectiveness***  
52  
53  
54  
55  
56  
57  
58  
59  
60

1  
2  
3 390 Cost-effectiveness will be assessed from patient, provider, and societal perspectives. Cost  
4  
5 391 data will be calculated by multiplying the quantity of utilised resources by the unit price. Data on  
6  
7  
8 392 quantity and unit price will be obtained from within the trial or estimated from relevant data  
9  
10 393 sources. For effectiveness data, both clinical and economic indices will be used. The clinical index  
11  
12 394 will be based on days of abstinence from the primarily used substance in the previous 28 days,  
13  
14 395 which will be converted into years of abstinence. The economic index will be based on the quality-  
15  
16 396 adjusted life year (QALY) calculated from the utility score of the EQ-5D.

### 19 397 *Feedback interviews*

21 398 Semi-structured interviews will be conducted with both participants and providers to assess  
22  
23 399 the following: satisfaction with content quality, comprehensibility, technical experience regarding  
24  
25 400 video-conferencing, comfort, module practicability, language barriers, and participants'  
26  
27 401 perception of the credibility of providers. Interviews will be audio-recorded with the interviewees'  
28  
29 402 consent.  
30  
31  
32

33 403

### 35 404 **Participant characteristics**

37 405 The following data will be obtained via a self-administered questionnaire: age, gender,  
38  
39 406 approximate residential location, marital status, household cohabitants, ethnicity, religion, highest  
40  
41 407 education level, employment status, individual and household income, type of Internet device used,  
42  
43 408 frequency of video calls in the past year, age during first instance of drug use, primarily used  
44  
45 409 substance, inpatient history or incarceration in the past month, types of treatments received,  
46  
47 410 treatment locations in the past three months, status of current outpatient care (voluntary or  
48  
49 411 involuntary, legal or non-legal), and transportation time and cost from residence to outpatient  
50  
51  
52 412 locations.  
53  
54  
55  
56  
57  
58  
59

1  
2  
3 4134  
5  
6 414 **Data collection procedure**

7  
8  
9 415 Researchers blinded to the treatment allocation will collect data at three different time  
10  
11 416 points: at baseline (week 0, T1), the week after the completion of treatment (week 13, T2), three  
12  
13 417 months after the completion of treatment (week 24, T3), and 12 months after the completion of  
14  
15 418 treatment (week 60, T4), using self-answered questionnaires and online one-on-one interviews.  
16  
17 419 For the primary outcome, participants will be asked to recall weekly drug use using the TLFB;  
18  
19 420 with a period of approximately 4 weeks between each assessment. Urine specimens will be  
20  
21 421 collected only at T2 and at the final 2 weeks within the TLFB assessment period. The assessment  
22  
23 422 schedule is presented in **Table 2** and **Figure 2**. To facilitate honest disclosure from participants,  
24  
25 423 we will not record any Indo-DARPP video-conferencing sessions throughout the study.  
26  
27  
28  
29

30 424

31  
32  
33 425 [Figure 2 here]34  
35 42636  
37  
38 427 **Sample size**

39  
40  
41 428 The sample size was calculated for the primary outcome to detect a medium effect size of  $d =$   
42  
43 429  $0.50$ , which is slightly more modest than that of a previous study examining the efficacy of  
44  
45 430 telemedicine for people with SUD in an LIMC ( $d = 0.59$ ).<sup>100</sup> Using  $\alpha = 0.05$ , power = 0.80, a  
46  
47 431 simple t-test requires  $n = 64$  per arm. We estimated the design effect of clustering within the  
48  
49 432 Indo-DARPP group using the formula  $D = 1 + (m - 1)\rho$ ,<sup>101</sup> assuming intraclass correlation  
50  
51 433 within Indo-DARPP groups or  $\rho = 0.05$ , and group size or  $m = 5$ , which yielded a design effect  
52  
53 434 of  $D = 1.2$ . We then multiplied  $n = 64$  by  $D = 1.2$ , which yielded the minimal number of  
54  
55  
56  
57  
58  
59  
60

1  
2  
3 435 participants in the data analysis:  $n = 77$  per arm. Assuming an attrition proportion of 30% which  
4  
5 436 is more conservative than a previous similar study (26%),<sup>102</sup> the sample size for enrolment was  
6  
7  
8 437 set as 110 per arm, or 220 in total.  
9

10 438

### 11 12 13 439 **Statistical analysis**

14  
15  
16 440 A detailed statistical analysis plan will be developed by a statistician who is blinded to the  
17  
18 441 patient allocation prior to data analysis. Baseline data description and main analyses will be  
19  
20  
21 442 conducted on an intention-to-treat basis; that is, participants' data will be handled according to  
22  
23 443 their initially assigned arms, regardless of the actual received treatment. Analyses will be  
24  
25 444 conducted with a significance level of 5% in the two-sided test, using Stata/SE 16.1.  
26  
27

### 28 445 ***Consideration for correlated outcome data***

29  
30  
31 446 The correlation within sites for the control arm will be ignored, as the TAU within one site  
32  
33 447 varies per patient and some participants may not receive any treatment. For the intervention arm,  
34  
35 448 the correlation within each Indo-DARPP group due to the nature of group therapy needs to be  
36  
37  
38 449 considered. We define a new variable termed 'clustering group identification' (CID), in which the  
39  
40 450 control arm will be coded as a unique CID for each person, while the intervention arm will be  
41  
42 451 coded based on the tele-Indo-DARPP group, hence assigning the same CID for all five participants.  
43  
44

### 45 452 ***Main analysis***

46  
47  
48 453 The primary endpoint has been set at T2. The mean of the outcome changes from T1 to T2  
49  
50 454 will be compared between the intervention and control arms using a linear model. To investigate  
51  
52  
53 455 the durability of the treatment effect, outcome changes from T1 to T3 and T4 will also be compared  
54  
55 456 between the two arms. We will account for the aforementioned correlations by clustering data  
56  
57  
58  
59  
60

1  
2  
3 457 based on CID in the generalised estimation equations (GEE). To help interpret the effect size,  
4  
5 458 Cohen's *d* between the arms will be calculated.  
6  
7

### 8 459 ***Missing values***

10  
11 460 A complete case analysis will be performed, which will only include participants with no  
12  
13 461 missing values in the variables of interest. Sensitivity analysis for missing values will be conducted  
14  
15 462 by either inverse probability-weighted GEE<sup>103</sup> or multiple imputation.  
16  
17

### 18 463 ***Subgroup analysis***

20  
21 464 Effects of the intervention will be investigated by subgroups, as the observed effect may  
22  
23 465 vary depending on the specific population. Participants will be divided by the types of primarily  
24  
25 466 used substance, gender, previous and current utilisation of other SUD treatment, high and low  
26  
27 467 values in clinical characteristics at T1 (for example, percent days of abstinence, ASI drug use  
28  
29 468 composite score, URICA readiness score, and cognitive function. Specifically, based on previous  
30  
31 469 studies which showed that treatment effectiveness varied depending on baseline severity levels  
32  
33 470 <sup>104,105</sup>, we hypothesised that participants assigned to tele-Indo-DARPP with more severe levels of  
34  
35 471 substance use at T1 would report more increase in days of abstinence at T2, T3, and T4.  
36  
37  
38  
39

### 40 472 ***Implementation evaluation***

41  
42 473 Chi-squared tests and *t*-tests will be performed to compare retention in treatment and  
43  
44 474 treatment satisfaction between the arms, exclusively for participants who are already receiving  
45  
46 475 SUD treatment at T1. Group cohesion and Indo-DARPP attendance will be descriptively reported  
47  
48 476 by means and standard deviations. For cost-effectiveness analysis, the incremental cost-  
49  
50 477 effectiveness ratios (ICERs) will be calculated, which will yield costs per QALY and abstinent  
51  
52 478 year. Feedback interviews will be transcribed, and thematic analysis will be conducted.  
53  
54  
55  
56  
57  
58  
59

1  
2  
3 4794  
5 480 **Compensations**

6  
7  
8 481 Participants in both the control and intervention groups will receive 300,000 IDR (~ 21.3  
9  
10 482 USD) to compensate for their transportation to treatment sites for TAU throughout the 12 weeks,  
11  
12 483 and 98,000 IDR (~ 7.0 USD) every time they completed an online video assessment as  
13  
14 484 compensation for internet data and 2-hour data collection. Participants from the intervention group  
15  
16 485 will further receive internet mobile data equivalent to 50,000 IDR (~ 3.5 USD) before the first  
17  
18 486 session of tele-Indo-DARPP, and subsequently every time they attend four sessions of tele-Indo-  
19  
20 487 DARPP. For providers, compensation of 170,000 IDR (~ 12.1 USD) and 150,000 IDR (~ 10.7  
21  
22 488 USD) will be provided for each tele-Indo-DARPP session to the facilitator and co-facilitator,  
23  
24 489 respectively.  
25  
26  
27  
28  
29

30 490

31 491 **Data monitoring**

32  
33 492 Data on adverse events, including hospitalisation, arrest, and death, will be collected from  
34  
35 493 the participants' treating psychiatrists or medical staff. In addition, participants will be interviewed  
36  
37 494 at T2 to determine whether they have experienced any subjective harmful effects (e.g. withdrawal  
38  
39 495 syndrome, increased cravings) after joining Indo-DARPP. An independent data monitoring  
40  
41 496 committee will not be convened, as the study involves short-term, non-invasive psychotherapeutic  
42  
43 497 intervention. No interim analysis was planned due to the short duration of the intervention.  
44  
45 498 Completeness and accuracy of data collection will be checked by Japanese co-investigators, and  
46  
47 499 there will be no auditing process by independent investigators.  
48  
49  
50

51 500

52  
53 501 **Data publication**  
54  
55  
56  
57  
58  
59  
60

1  
2  
3 502 The results of the study will be published in scientific publications and reported to relevant  
4  
5 503 government bodies in Indonesia to advocate adopting the treatment module.  
6  
7

8 504

9  
10 505 **Ethical consideration and dissemination**  
11

12  
13 506 The study protocol was approved by the Research Ethical Committee of Faculty of Medicine,  
14  
15 507 Universitas Indonesia (approval number: KET-1175/2019) and the Ethics Committee of the  
16  
17 508 Graduate School and Faculty of Medicine, Kyoto University (approval number: C1483). The study  
18  
19 509 protocol was registered at the University Hospital Medical Information Network Clinical Trial  
20  
21 510 Registry (UMIN-CTR) (registry number: UMIN000042186).  
22  
23  
24

25 511 The consent process will be conducted carefully to ensure that all potential participants  
26  
27 512 fully understand the research objectives, procedures, risks, benefits, costs, and alternatives. It will  
28  
29 513 be emphasised that study participation is voluntary, and consent can be withdrawn at any time  
30  
31 514 before publication. We will allocate participants to treatment arms only when written informed  
32  
33 515 consent for participation is obtained. Likewise, urine specimens will only be collected if written  
34  
35 516 informed consent for urine collection is obtained. Participants will not be influenced when  
36  
37 517 deciding on study participation and/or urine collection. Personal data will be protected by  
38  
39 518 separating the study data from the participants' identifiable information. To quickly respond to  
40  
41 519 adverse events arising when outpatient visits are not possible, a dedicated phone number and  
42  
43 520 WhatsApp account for the study will be opened to ease communication with the research team.  
44  
45 521 Participants will be instructed to text or call when experiencing adverse events. Importantly,  
46  
47 522 written agreement will be obtained from participants to never share others' information with any  
48  
49 523 third party. This regulation will be enforced both during and outside tele-Indo-DARPP sessions,  
50  
51 524 in any medium, including video conference and group chat.  
52  
53  
54  
55  
56  
57  
58  
59  
60

1  
2  
3 525 The results of this study will be disseminated via peer-reviewed journals and international  
4  
5 526 academic conferences. Depending on trial outcomes, Indo-DARPP will be advocated to the  
6  
7  
8 527 Indonesian government for adoption as a nationwide formal treatment program.  
9

10 528

### 13 529 **Patient and public involvement**

15 530 Patient feedback during the pilot study was incorporated into the Indo-DARPP module design. In  
16  
17  
18 531 addition, patients and/or the public will not be involved in conducting, reporting, or disseminating  
19  
20 532 this study.  
21

22 533

### 25 534 **Discussion**

27  
28 535 Till the time of writing, nine RCTs from LMICs had reported the effectiveness of digital  
29  
30 536 delivery of interventions for SUD. The utilised formats were telephone calls,<sup>106–109</sup> webpages,<sup>110–</sup>  
31  
32 537 <sup>112</sup> and mobile applications.<sup>100,113</sup> However, no study in LMICs has so far investigated the  
33  
34  
35 538 effectiveness of video conference-based psychotherapy. The latter may facilitate honest,  
36  
37 539 interactive discussions on personal substance use and cravings, founded on better rapport between  
38  
39  
40 540 providers and patients,<sup>114</sup> all of which are integral to CBT for SUD. One meta-analysis concluded  
41  
42 541 that web-based mental health interventions had better retention rates and treatment outcomes when  
43  
44 542 therapists were synchronously involved.<sup>115</sup>  
45

46  
47 543 This study has several strengths. This will be the first RCT to investigate the effectiveness  
48  
49 544 of video conference-based psychotherapy in any LMIC, as well as the first study to establish  
50  
51  
52 545 quality evidence on psychotherapy for SUD in Indonesia. Recruitment will be done throughout  
53  
54 546 multiple levels of care, that is, tertiary (referral hospitals), primary (Puskesmas), and community  
55  
56  
57  
58  
59  
60



1  
2  
3 547 (rehabilitation centres). The latter have extensive reach encompassing all major Indonesian islands,  
4  
5 548 and social media advertising will facilitate recruitment across the nation. While effectiveness of  
6  
7 549 CBT is the primary outcome, the study allows examinations of real-world implementation and  
8  
9  
10 550 cost-effectiveness in a hybrid effectiveness-implementation design.<sup>64</sup> This is particularly true in  
11  
12 551 Puskesmas, where the providers will be general practitioners, and in rehabilitation centres, where  
13  
14 552 the providers will be peer counsellors. This pragmatic RCT aims to mimic usual clinical practice,  
15  
16 553 and we hope that the results may be used to inform decision-making by patients, providers, and  
17  
18  
19 554 policymakers.<sup>116</sup>  
20  
21

22 555 This study has several limitations. All data from participants will be self-reported and prone  
23  
24 556 to recall and social desirability bias. Urine tests will be performed to corroborate subjective data,  
25  
26 557 but will not constitute a full validation as they will only be performed once to represent substance-  
27  
28 558 detectable period. This was planned only at T2 to improve feasibility for participants and reduce  
29  
30  
31 559 the risk of drop-outs. Control conditions will be heterogeneous, as the study will include  
32  
33 560 participants who use various substances at multiple sites, where TAU differs or may not even be  
34  
35 561 provided. Variability in the providers' background may create inconsistency in CBT delivery, even  
36  
37  
38 562 though training and treatment manuals will be introduced to standardise care. Treatment delivery  
39  
40 563 via online video-conferencing might have poor generalisability towards people with low Internet  
41  
42 564 literacy, as well as people in low socio-economic strata who cannot afford smartphones, although  
43  
44 565 entry-level Android-based smartphones (less than 100 USD) are available nationwide in Indonesia.  
45  
46  
47 566 Psychotherapy will be provided in Bahasa Indonesia; hence its effectiveness would not be  
48  
49 567 generalisable to people with limited proficiency in the language.  
50  
51

52 568 Efforts to establish evidence-based treatment for SUD should be scaled up in Indonesia  
53  
54  
55 569 and LMICs in general, where effectiveness data are sparse. The proposed study may present high-  
56  
57  
58  
59  
60

1  
2  
3 570 quality evidence, and a successful outcome may result in a new SUD treatment module in  
4  
5 571 Indonesia, paving the way for the adoption of Indo-DARPP into the national guidelines. We hope  
6  
7 572 that our efforts may further promote a comprehensive healthcare approach, as opposed to  
8  
9 573 repressive anti-drug policies, for the SUD population.  
10  
11  
12

13 574

### 15 575 **Acknowledgements**

16  
17  
18 576 We would like to thank Dr Takashi Kawamura for his valuable comments on the study design.  
19  
20

21 577

### 23 578 **Author contributions**

24  
25  
26 579 CY, KS, and YO conceptualised the study. CY, KS, EH, and YO are the main developers of the  
27  
28 580 Indo-DARPP module, designed study methodology, liaised with site investigators, trained the  
29  
30 581 providers, wrote the protocol, and reviewed and edited the final manuscript. EB, VR, PA, and AP  
31  
32 582 helped in module development, study design, training of providers, and site coordination. TS  
33  
34 583 provided statistical and epidemiological supervision. TM provided the original SMARPP module,  
35  
36 584 clinical input, and perspectives to improve study quality. RS supervised the study and provided  
37  
38 585 grant support. CY and RS were the principal investigators of the grant. All authors have read and  
39  
40 586 approved the final manuscript.  
41  
42  
43  
44

45 587

### 48 588 **Funding**

49  
50 589 This work was supported by the Japan-ASEAN Platform for Transdisciplinary Studies project of  
51  
52 590 the Center for Southeast Asian Studies of Kyoto University, Research Unit for Development of  
53  
54  
55  
56  
57  
58  
59

1  
2  
3 591 Global Sustainability of Kyoto University, and the Japan Society for the Promotion of Science  
4  
5 592 (JSPS) Grants-in-Aid for Scientific Research (KAKENHI) (Grant number JP19K24256).  
6  
7

8 593  
9

#### 10 594 **Competing interests**

11  
12  
13 595 The authors declare no competing interest.  
14

15 596

#### 17 597 **Patient consent for publication**

18  
19 598 Not required.  
20  
21

22 599

#### 24 600 **Ethics approval and trial registration**

25  
26 601 This study protocol was approved by the Research Ethical Committee of the Faculty of Medicine,  
27  
28 602 Universitas Indonesia (approval number: KET-1175/2019) and the Ethics Committee of the  
29  
30 603 Graduate School and Faculty of Medicine, Kyoto University (approval number: C1483). The study  
31  
32 604 protocol was registered at the University Hospital Medical Information Network Clinical Trial  
33  
34 605 Registry (UMIN-CTR) (registry number: UMIN000042186).  
35  
36  
37

38 606  
39  
40

#### 41 607 **Availability of data and materials**

42  
43 608 The full protocol and datasets of the planned study will be available from the corresponding author  
44  
45 609 upon reasonable request.  
46  
47

48 610  
49

50 611

#### 51 612 **Figure legends**

52  
53 613 **Figure 1.** Study flowchart for each site. A total of 20 or 30 participants will be recruited through  
54  
55 614 the social network of each site. After 10 participants have been recruited to constitute one wave,  
56  
57  
58

1  
2  
3 615 they will be randomly allocated into two arms: intervention (Indo-DARPP + TAU) and control  
4  
5 616 (TAU only), with 5 participants in each arm. Recruitment will be continued until another 10 or 20  
6  
7 617 participants (second or third wave) join, in a similar procedure. Treatment period will be 12 weeks.  
8  
9 618 Assessments will be conducted four times: T1 (Week 0) during baseline or before randomisation,  
10  
11 619 T2 (Week 13-16) during post-assessment or 1-4 weeks after treatment period ends, T3 (Week 24)  
12  
13 620 at 3 months after treatment ends, and T4 (Week 60) at 12 months after treatment ends.  
14  
15  
16  
17 621

18  
19 622 **Figure 2.** Planned trial schedule across all 8 research sites. Staggered schedules were designed to  
20  
21 623 spread the assessment workload of providers and research staff. After training the providers, all  
22  
23 624 sites will be given approximately 1-2 months to recruit participants. Sites with relatively higher  
24  
25 625 potential to recruit faster, i.e., those with higher rates of patient turnover, have been selected first  
26  
27 626 in the schedule. Each site will have two or three waves of recruitment and treatment periods.  
28  
29  
30

31 627

## 32 628 **References**

- 33  
34  
35 629 1. GBD 2016 Alcohol and Drug Use Collaborators. The global burden of disease attributable to alcohol and  
36 630 drug use in 195 countries and territories, 1990-2016: A systematic analysis for the Global Burden of  
37 631 Disease Study 2016. *Lancet Psychiatry* 2018; 5: 987–1012.
- 38  
39 632 2. Murray CJL, Aravkin AY, Zheng P, et al. Global burden of 87 risk factors in 204 countries and  
40 633 territories, 1990–2019: A systematic analysis for the Global Burden of Disease Study 2019. *Lancet* 2020;  
41 634 396: 1223–1249.
- 42  
43 635 3. Peacock A, Leung J, Larney S, et al. Global statistics on alcohol, tobacco and illicit drug use: 2017 status  
44 636 report. *Addiction* 2018; 113: 1905–1926.
- 45  
46 637 4. United Nations Office on Drugs and Crimes. *World Drug Report 2020*. Vienna: UNODC, 2020.
- 47  
48 638 5. Connery HS, McHugh RK, Reilly M, et al. Substance use disorders in global mental health delivery:  
49 639 Epidemiology, treatment gap, and implementation of evidence-based treatments. *Harv Rev Psychiatry*  
50 640 2020; 28: 316–327.
- 51  
52 641 6. Lora A, Hanna F, Chisholm D. Mental health service availability and delivery at the global level: an  
53 642 analysis by countries' income level from WHO's Mental Health Atlas 2014. *Epidemiol Psychiatr Sci*  
54 643 2017; 1–12.
- 55  
56  
57  
58  
59  
60

- 1  
2  
3 644 7. Rawson RA, Woody G, Kresina TF, et al. The globalization of addiction research: capacity-building  
4 645 mechanisms and selected examples. *Harv Rev Psychiatry* 2015; 23: 147–156.  
5  
6 646 8. Degenhardt L, Glantz M, Evans-Lacko S, et al. Estimating treatment coverage for people with substance  
7 647 use disorders: an analysis of data from the World Mental Health Surveys. *World Psychiatry* 2017; 16:  
8 648 299–307.  
9  
10 649 9. Puslitdatin Badan Narkotika Nasional. *Indonesia drugs report 2019*. Jakarta: Badan Narkotika Nasional,  
11 650 August 1, 2019.  
12  
13 651 10. Puslitdatin Badan Narkotika Nasional. *Survei penyalahgunaan dan peredaran gelap narkoba tahun 2018*  
14 652 *[Survey of illicit drug abuse and black marketing in 2018]*. Badan Narkotika Nasional,  
15 653 [https://perpustakaan.bnn.go.id/sites/default/files/Buku\\_Digital\\_2020-](https://perpustakaan.bnn.go.id/sites/default/files/Buku_Digital_2020-10/Survei%20Penyalahgunaan%20Dan%20Peredaran%20Gelap%20Narkoba%20Tahun%202018%20%28%20BNN%20-%20LIPI%29.pdf)  
16 654 [10/Survei%20Penyalahgunaan%20Dan%20Peredaran%20Gelap%20Narkoba%20Tahun%202018%20%28%20BNN%20-%20LIPI%29.pdf](https://perpustakaan.bnn.go.id/sites/default/files/Buku_Digital_2020-10/Survei%20Penyalahgunaan%20Dan%20Peredaran%20Gelap%20Narkoba%20Tahun%202018%20%28%20BNN%20-%20LIPI%29.pdf) (May 1, 2019, accessed December 4, 2020).  
17 655  
18  
19 656 11. Puslitdatin Badan Narkotika Nasional. *Ringkasan eksekutif hasil survei BNN tahun 2016 [Executive*  
20 657 *summary of survey result by BNN in 2016]*. Jakarta: Badan Narkotika Nasional,  
21 658 <https://www.issup.net/files/2017-10/penelitian%20prevelansi%20UI%20dan%20BNN.pdf> (February 1,  
22 659 2017).  
23  
24 660 12. Al-Ansari B, Thow A-M, Day CA, et al. Extent of alcohol prohibition in civil policy in Muslim majority  
25 661 countries: The impact of globalization. *Addiction* 2016; 111: 1703–1713.  
26  
27 662 13. World Health Organization. *Global Status Report on Alcohol and Health 2018*. World Health  
28 663 Organization, 2019.  
29  
30 664 14. Media Indonesia. Banyak narkoba jenis baru masuk ke Indonesia [A lot of new types of illicit drugs has  
31 665 entered Indonesia]. *Media Indonesia*, [https://mediaindonesia.com/politik-dan-hukum/325442/banyak-](https://mediaindonesia.com/politik-dan-hukum/325442/banyak-narkoba-jenis-baru-masuk-ke-indonesia)  
32 666 [narkoba-jenis-baru-masuk-ke-indonesia](https://mediaindonesia.com/politik-dan-hukum/325442/banyak-narkoba-jenis-baru-masuk-ke-indonesia) (2020, accessed December 4, 2020).  
33  
34 667 15. Kosten TR, Petrakis IL. The hidden epidemic of opioid overdoses during the Coronavirus Disease 2019  
35 668 pandemic. *JAMA Psychiatry*. Epub ahead of print December 30, 2020. DOI:  
36 669 10.1001/jamapsychiatry.2020.4148.  
37  
38 670 16. Kementerian Kesehatan Republik Indonesia. *Aplikasi komunikasi data [Data communication*  
39 671 *application]*. {Kementerian Kesehatan Republik Indonesia}, <https://komdat.kemkes.go.id/lama/index.php>  
40 672 (2020, accessed January 10, 2021).  
41  
42 673 17. Idaiani S, Riyadi EI. Sistem kesehatan jiwa di indonesia: Tantangan untuk memenuhi kebutuhan  
43 674 [Indonesian mental health system: The challenge to fulfill needs]. *Jurnal Penelitian dan Pengembangan*  
44 675 *Pelayanan Kesehatan* 2018; 70–80.  
45  
46 676 18. Marastuti A, Subandi MA, Retnowati S, et al. Development and evaluation of a mental health training  
47 677 program for community health workers in indonesia. *Community Ment Health J* 2020; 56: 1248–1254.  
48  
49 678 19. Wammes JJG, Siregar AY, Hidayat T, et al. Cost-effectiveness of methadone maintenance therapy as  
50 679 HIV prevention in an Indonesian high-prevalence setting: A mathematical modeling study. *Int J Drug*  
51 680 *Policy* 2012; 23: 358–364.  
52  
53 681 20. Afriandi I, Siregar AYM, Meheus F, et al. Costs of hospital-based methadone maintenance treatment in  
54 682 HIV/AIDS control among injecting drug users in Indonesia. *Health Policy* 2010; 95: 69–73.  
55  
56  
57  
58  
59  
60

- 1  
2  
3 683 21. Sharma M, Oppenheimer E, Saidel T, et al. A situation update on HIV epidemics among people who  
4 684 inject drugs and national responses in South-East Asia Region. *AIDS* 2009; 23: 1405–1413.  
5  
6 685 22. Sarasvita R, Tonkin A, Utomo B, et al. Predictive factors for treatment retention in methadone programs  
7 686 in Indonesia. *J Subst Abuse Treat* 2012; 42: 239–246.  
8  
9 687 23. Rumah Sakit Ketergantungan Obat. *Laporan Kegiatan Tahunan (Annual Report) 2007*. {Rumah Sakit  
10 688 Ketergantungan Obat}, 2008.  
11  
12 689 24. Iskandar S, van Crevel R, Hidayat T, et al. Severity of psychiatric and physical problems is associated  
13 690 with lower quality of life in methadone patients in Indonesia. *Am J Addict* 2013; 22: 425–431.  
14  
15 691 25. Herindrasti VLS. Drug-free ASEAN 2025: Tantangan Indonesia dalam penanggulangan penyalahgunaan  
16 692 narkoba [Drug-free ASEAN 2025: Indonesia’s challenge in tackling drugs abuse]. *Jurnal Hubungan*  
17 693 *Internasional* 2018; 7: 19–33.  
18  
19 694 26. Kramer E, Stoicescu C. An uphill battle: A case example of government policy and activist dissent on the  
20 695 death penalty for drug-related offences in Indonesia. *Int J Drug Policy* 2021; 103265.  
21  
22 696 27. McHugh RK, Hearon BA, Otto MW. Cognitive behavioral therapy for substance use disorders. *Psychiatr*  
23 697 *Clin North Am* 2010; 33: 511–525.  
24  
25 698 28. Magill M, Ray LA. Cognitive-behavioral treatment with adult alcohol and illicit drug users: A meta-  
26 699 analysis of randomized controlled trials. *J Stud Alcohol Drugs* 2009; 70: 516–527.  
27  
28 700 29. Bigelow GE, Silverman K. Theoretical and empirical foundations of contingency management treatments  
29 701 for drug abuse, <https://psycnet.apa.org/record/1999-02363-001> (1999).  
30  
31 702 30. Miller WR, Rollnick S. *Motivational Interviewing: Helping People Change*. Guilford Press, 2012.  
32  
33 703 31. Miller WR, Rollnick S. *Motivational interviewing: Preparing people for change*, 2nd ed. 2002; 2: 428.  
34  
35 704 32. Alan Marlatt G, Gordon JR. *Relapse Prevention: Maintenance Strategies in the Treatment of Addictive*  
36 705 *Behaviors*. Guilford Press, 1985.  
37  
38 706 33. Sobell LC, Sobell MB, Agrawal S. Randomized controlled trial of a cognitive-behavioral motivational  
39 707 intervention in a group versus individual format for substance use disorders. *Psychol Addict Behav* 2009;  
40 708 23: 672–683.  
41  
42 709 34. Sobell LC, Sobell MB. *Group Therapy for Substance Use Disorders: A Motivational Cognitive-*  
43 710 *behavioral Approach*. Guilford Press, 2011.  
44  
45 711 35. Myers B. 11 - Psychotherapy for substance use disorders. In: Stein DJ, Bass JK, Hofmann SG (eds)  
46 712 *Global Mental Health and Psychotherapy*. Academic Press, 2019, pp. 241–256.  
47  
48 713 36. Heijdra Suasnabar JM, Hipple Walters B. Community-based psychosocial substance use disorder  
49 714 interventions in low-and-middle-income countries: A narrative literature review. *Int J Ment Health Syst*  
50 715 2020; 14: 74.  
51  
52 716 37. Joseph J, Basu D. Efficacy of Brief Interventions in Reducing Hazardous or Harmful Alcohol Use in  
53 717 Middle-Income Countries: Systematic Review of Randomized Controlled Trials. *Alcohol Alcohol* 2017;  
54 718 52: 56–64.  
55  
56  
57  
58  
59  
60

- 1  
2  
3 719 38. Preusse M, Neuner F, Ertl V. Effectiveness of Psychosocial Interventions Targeting Hazardous and  
4 720 Harmful Alcohol Use and Alcohol-Related Symptoms in Low- and Middle-Income Countries: A  
5 721 Systematic Review. *Front Psychiatry* 2020; 11: 768.  
6  
7 722 39. Ögel K, Coskun S. Cognitive behavioral therapy-based brief intervention for volatile substance misusers  
8 723 during adolescence: a follow-up study. *Subst Use Misuse* 2011; 46 Suppl 1: 128–133.  
9  
10 724 40. Min Z, Xu L, Chen H, et al. A pilot assessment of relapse prevention for heroin addicts in a Chinese  
11 725 rehabilitation center. *Am J Drug Alcohol Abuse* 2011; 37: 141–147.  
12  
13 726 41. Wechsberg WM, Krupitsky E, Romanova T, et al. Double jeopardy--drug and sex risks among Russian  
14 727 women who inject drugs: initial feasibility and efficacy results of a small randomized controlled trial.  
15 728 *Subst Abuse Treat Prev Policy* 2012; 7: 1.  
16  
17 729 42. Pan S, Jiang H, Du J, et al. Efficacy of Cognitive Behavioral Therapy on Opiate Use and Retention in  
18 730 Methadone Maintenance Treatment in China: A Randomised Trial. *PLoS One* 2015; 10: e0127598.  
19  
20 731 43. Alammehrjerdi Z, Briggs NE, Biglarian A, et al. A Randomized Controlled Trial of Brief Cognitive  
21 732 Behavioral Therapy for Regular Methamphetamine Use in Methadone Treatment. *Journal of*  
22 733 *Psychoactive Drugs* 2019; 51: 280–289.  
23  
24 734 44. The future of mental health care in Indonesia, [https://www.insideindonesia.org/the-future-of-mental-](https://www.insideindonesia.org/the-future-of-mental-health-care-in-indonesia)  
25 735 [health-care-in-indonesia](https://www.insideindonesia.org/the-future-of-mental-health-care-in-indonesia) (accessed January 10, 2021).  
26  
27 736 45. The Jakarta Post. Traffic jam: Jakarta roads remain one of world's most congested,  
28 737 [https://www.thejakartapost.com/news/2020/02/06/traffic-jam-jakarta-roads-remain-one-of-worlds-most-](https://www.thejakartapost.com/news/2020/02/06/traffic-jam-jakarta-roads-remain-one-of-worlds-most-congested.html)  
29 738 [congested.html](https://www.thejakartapost.com/news/2020/02/06/traffic-jam-jakarta-roads-remain-one-of-worlds-most-congested.html) (accessed January 10, 2021).  
30  
31 739 46. Mannarini S, Boffo M. Anxiety, bulimia, drug and alcohol addiction, depression, and schizophrenia: what  
32 740 do you think about their aetiology, dangerousness, social distance, and treatment? A latent class analysis  
33 741 approach. *Soc Psychiatry Psychiatr Epidemiol* 2015; 50: 27–37.  
34  
35 742 47. Staton-Tindall M, Havens JR, Webster JM, et al. METelemedicine: a pilot study with rural alcohol users  
36 743 on community supervision: A pilot study with rural alcohol users. *J Rural Health* 2014; 30: 422–432.  
37  
38 744 48. Baca CT, Manuel JK. Satisfaction With Long-distance Motivational Interviewing for Problem Drinking.  
39 745 *Addict Disord Their Treat* 2007; 6: 39.  
40  
41 746 49. De Leo JA, Lamb K, LaRowe S, et al. A brief behavioral telehealth intervention for veterans with alcohol  
42 747 misuse problems in VA primary care. *Drug Alcohol Depend* 2014; Complete: e45.  
43  
44 748 50. Tarp K, Bojesen AB, Mejdal A, et al. Effectiveness of Optional Videoconferencing-Based Treatment of  
45 749 Alcohol Use Disorders: Randomized Controlled Trial. *JMIR Ment Health* 2017; 4: e38.  
46  
47 750 51. King VL, Stoller KB, Kidorf M, et al. Assessing the effectiveness of an Internet-based videoconferencing  
48 751 platform for delivering intensified substance abuse counseling. *J Subst Abuse Treat* 2009; 36: 331–338.  
49  
50 752 52. King VL, Brooner RK, Peirce JM, et al. A randomized trial of Web-based videoconferencing for  
51 753 substance abuse counseling. *J Subst Abuse Treat* 2014; 46: 36–42.  
52  
53 754 53. Boumparis N, Schulte MHJ, Riper H. Digital Mental Health for Alcohol and Substance Use Disorders.  
54 755 *Current Treatment Options in Psychiatry* 2019; 6: 352–366.  
55  
56  
57  
58  
59  
60

- 1  
2  
3 756 54. Naslund JA, Aschbrenner KA, Araya R, et al. Digital technology for treating and preventing mental  
4 757 disorders in low-income and middle-income countries: a narrative review of the literature. *Lancet*  
5 758 *Psychiatry* 2017; 4: 486–500.  
6  
7 759 55. Lin LA, Casteel D, Shigekawa E, et al. Telemedicine-delivered treatment interventions for substance use  
8 760 disorders: A systematic review. *J Subst Abuse Treat* 2019; 101: 38–49.  
9  
10 761 56. Boumparis N, Karyotaki E, Schaub MP, et al. Internet interventions for adult illicit substance users: a  
11 762 meta-analysis. *Addiction* 2017; 112: 1521–1532.  
12  
13 763 57. Boumparis N, Loheide-Niesmann L, Blankers M, et al. Short- and long-term effects of digital prevention  
14 764 and treatment interventions for cannabis use reduction: A systematic review and meta-analysis. *Drug*  
15 765 *Alcohol Depend* 2019; 200: 82–94.  
16  
17 766 58. Fu Z, Burger H, Arjadi R, et al. Effectiveness of digital psychological interventions for mental health  
18 767 problems in low-income and middle-income countries: a systematic review and meta-analysis. *Lancet*  
19 768 *Psychiatry* 2020; 7: 851–864.  
20  
21 769 59. The Mobile Economy Asia Pacific 2020 - The Mobile Economy,  
22 770 <https://www.gsma.com/mobileeconomy/asiapacific/> (accessed January 10, 2021).  
23  
24 771 60. Shore JH, Schneck CD, Mishkind MC. Telepsychiatry and the Coronavirus Disease 2019 pandemic-  
25 772 current and future outcomes of the rapid virtualization of psychiatric care. *JAMA Psychiatry*. Epub ahead  
26 773 of print May 11, 2020. DOI: 10.1001/jamapsychiatry.2020.1643.  
27  
28 774 61. Molfenter T, Roget N, Chaple M, et al. Use of telehealth in substance use disorder (SUD) services during  
29 775 and after COVID-19. *JMIR Ment Health*. Epub ahead of print January 19, 2021. DOI: 10.2196/25835.  
30  
31 776 62. Adepoju P. Africa turns to telemedicine to close mental health gap. *Lancet Digit Health* 2020; 2: e571–  
32 777 e572.  
33  
34 778 63. Minas H. Mental health in a post-pandemic ASEAN. *The ASEAN*, 2021, pp. 37–38.  
35  
36 779 64. Curran GM, Bauer M, Mittman B, et al. Effectiveness-implementation hybrid designs: Combining  
37 780 elements of clinical effectiveness and implementation research to enhance public health impact. *Med*  
38 781 *Care* 2012; 50: 217–226.  
39  
40 782 65. Regional Office for Southeast Asia and the Pacific. *Guidance for Community-Based Treatment and Care*  
41 783 *Services for People Affected by Drug Use and Dependence in Southeast Asia*. United National Office on  
42 784 Drugs and Crime ,  
43 785 [https://www.unodc.org/documents/southeastasiaandpacific/cbtx/cbtx\\_guidance\\_EN.pdf](https://www.unodc.org/documents/southeastasiaandpacific/cbtx/cbtx_guidance_EN.pdf) (2014).  
44  
45 786 66. Nordfjærn T. Relapse patterns among patients with substance use disorders. *J Subst Use* 2011; 16: 313–  
46 787 329.  
47  
48 788 67. Brecht ML, Herbeck D. Time to relapse following treatment for methamphetamine use: A long-term  
49 789 perspective on patterns and predictors. *Drug Alcohol Depend* 2014; 139: 18–25.  
50  
51 790 68. Tosh G, Soares-Weiser K, Adams CE. Pragmatic vs explanatory trials: the pragmascope tool to help  
52 791 measure differences in protocols of mental health randomized controlled trials. *Dialogues Clin Neurosci*  
53 792 2011; 13: 209–215.  
54  
55 793 69. Matsumoto T, Imamura F, Kobayashi O, et al. [Development and evaluation of a relapse prevention tool  
56 794 for drug-abusing delinquents incarcerated in a juvenile classification home: a self-teaching workbook for  
57 795 adolescents, the "SMARPP-Jr"]. *Nihon Arukoru Yakubutsu Igakkai Zasshi* 2009; 44: 121–138.



- 1  
2  
3 796 70. Obert JL, McCann MJ, Marinelli-Casey P, et al. The matrix model of outpatient stimulant abuse  
4 797 treatment: history and description. *J Psychoactive Drugs* 2000; 32: 157–164.  
5  
6 798 71. Kondo A, Ide M, Takahashi I, et al. [Evaluation of the relapse prevention program for substance abusers  
7 799 called “TAMARPP” at mental health and welfare center]. *Nihon Arukoru Yakubutsu Igakkai Zasshi* 2014;  
8 800 49: 119–135.  
9  
10 801 72. Matsumoto T, Chiba Y, Imamura F, et al. Possible effectiveness of intervention using a self-teaching  
11 802 workbook in adolescent drug abusers detained in a juvenile classification home. *Psychiatry Clin Neurosci*  
12 803 2011; 65: 576–583.  
13  
14 804 73. Tanibuchi Y, Matsumoto T, Imamura F, et al. [Efficacy of the Serigaya Methamphetamine Relapse  
15 805 Prevention Program (SMARPP): for patients with drug use disorder: A study on factors influencing 1-  
16 806 year follow-up outcomes]. *Nihon Arukoru Yakubutsu Igakkai Zasshi* 2016; 51: 38–54.  
17  
18 807 74. Rawson RA, Huber A, McCann M, et al. A comparison of contingency management and cognitive-  
19 808 behavioral approaches during methadone maintenance treatment for cocaine dependence. *Arch Gen*  
20 809 *Psychiatry* 2002; 59: 817–824.  
21  
22 810 75. Carroll KM, Kiluk BD, Nich C, et al. Toward empirical identification of a clinically meaningful indicator  
23 811 of treatment outcome: features of candidate indicators and evaluation of sensitivity to treatment effects  
24 812 and relationship to one year follow up cocaine use outcomes. *Drug Alcohol Depend* 2014; 137: 3–19.  
25  
26 813 76. Fals-Stewart W, O’Farrell TJ, Freitas TT, et al. The timeline followback reports of psychoactive  
27 814 substance use by drug-abusing patients: Psychometric properties. *J Consult Clin Psychol* 2000; 68: 134–  
28 815 144.  
29  
30 816 77. Carey KB, Carey MP, Maisto SA, et al. Temporal stability of the timeline followback interview for  
31 817 alcohol and drug use with psychiatric outpatients. *J Stud Alcohol* 2004; 65: 774–781.  
32  
33 818 78. McLellan AT, Luborsky L, Woody GE, et al. An improved diagnostic evaluation instrument for  
34 819 substance abuse patients. The Addiction Severity Index. *J Nerv Ment Dis* 1980; 168: 26–33.  
35  
36 820 79. Kosten TR, Rounsaville BJ, Kleber HD. Concurrent validity of the addiction severity index. *J Nerv Ment*  
37 821 *Dis* 1983; 171: 606–610.  
38  
39 822 80. Hendriks VM, Kaplan CD, van Limbeek J, et al. The Addiction Severity Index: Reliability and validity in  
40 823 a Dutch addict population. *J Subst Abuse Treat* 1989; 6: 133–141.  
41  
42 824 81. Carise D. *Addiction Severity Index Treatnet Version: Manual and Question by Question “Q by Q” Guide*.  
43 825 United Nations Office on Drugs and Crime, 2007.  
44  
45 826 82. Herdman M, Gudex C, Lloyd A, et al. Development and preliminary testing of the new five-level version  
46 827 of EQ-5D (EQ-5D-5L). *Qual Life Res* 2011; 20: 1727–1736.  
47  
48 828 83. Janssen MF, Simon Pickard A, Golicki D, et al. Measurement properties of the EQ-5D-5L compared to  
49 829 the EQ-5D-3L across eight patient groups: a multi-country study. *Quality of Life Research* 2013; 22:  
50 830 1717–1727.  
51  
52 831 84. Rand K, Arnevik EA, Walderhaug E. Quality of life among patients seeking treatment for substance use  
53 832 disorder, as measured with the EQ-5D-3L. *J Patient Rep Outcomes* 2020; 4: 92.  
54  
55 833 85. Goranitis I, Coast J, Day E, et al. Measuring health and broader well-being benefits in the context of  
56 834 opiate dependence: The psychometric performance of the ICECAP-A and the EQ-5D-5L. *Value Health*  
57 835 2016; 19: 820–828.  
58  
59  
60

- 1  
2  
3 836 86. Purba FD, Hunfeld JAM, Iskandarsyah A, et al. The Indonesian EQ-5D-5L Value Set.  
4 837 *Pharmacoeconomics* 2017; 35: 1153–1165.  
5  
6 838 87. McConnaughy EA, Prochaska JO, Velicer WF. Stages of change in psychotherapy: Measurement and  
7 839 sample profiles. *Group Dyn* 1983; 20: 368–375.  
8  
9 840 88. DiClemente CC, Schlundt D, Gemmell L. Readiness and stages of change in addiction treatment. *Am J*  
10 841 *Addict* 2004; 13: 103–119.  
11  
12 842 89. Carver CS. You want to measure coping but your protocol's too long: Consider the brief COPE. *Int J*  
13 843 *Behav Med* 1997; 4: 92–100.  
14  
15 844 90. Berg MK, Hobkirk AL, Joska JA, et al. The role of substance use coping in the relation between  
16 845 childhood sexual abuse and depression among methamphetamine users in South Africa. *Psychol Trauma*  
17 846 2017; 9: 493–499.  
18  
19 847 91. Derogatis LR, Savitz KL. The SCL-90-R, brief symptom inventory, and matching clinical rating scales.  
20 848 In: Maruish ME (ed) *The Use of Psychological Testing for Treatment Planning and Outcomes*  
21 849 *Assessment*. Lawrence Erlbaum Associates Publishers, xvi: Mahwah, NJ, US, 1999, pp. 679–724.  
22  
23 850 92. Bergly TH, Nordfjærn T, Hagen R. The dimensional structure of SCL-90-R in a sample of patients with  
24 851 substance use disorder. *J Subst Use* 2014; 19: 257–261.  
25  
26 852 93. Ryan JJ, Geisser ME. Validity and diagnostic accuracy of an alternate form of the Rey Auditory Verbal  
27 853 Learning Test. *Arch Clin Neuropsychol* 1986; 1: 209–217.  
28  
29 854 94. Potvin S, Pelletier J, Grot S, et al. Cognitive deficits in individuals with methamphetamine use disorder:  
30 855 A meta-analysis. *Addict Behav* 2018; 80: 154–160.  
31  
32 856 95. Rosa B, Oliveira J, Gamito P, et al. Cognitive improvement via mHealth for patients recovering from  
33 857 substance use disorder. In: *International Workshops on ICTs for Improving Patients Rehabilitation*  
34 858 *Research Techniques*. Springer International Publishing, 2017, pp. 69–82.  
35  
36 859 96. Ritsher JB, Otilingam PG, Grajales M. Internalized stigma of mental illness: psychometric properties of a  
37 860 new measure. *Psychiatry Res* 2003; 121: 31–49.  
38  
39 861 97. Larsen DL, Attkisson CC, Hargreaves WA, et al. Assessment of client/patient satisfaction: Development  
40 862 of a general scale. *Eval Program Plann* 1979; 2: 197–207.  
41  
42 863 98. Boden MT, Kimerling R, Jacobs-Lentz J, et al. Seeking Safety treatment for male veterans with a  
43 864 substance use disorder and post-traumatic stress disorder symptomatology. *Addiction* 2012; 107: 578–  
44 865 586.  
45  
46 866 99. Marziliano A, Pessin H, Rosenfeld B, et al. Measuring Cohesion and Self-Disclosure in Psychotherapy  
47 867 Groups for Patients with Advanced Cancer: An Analysis of the Psychometric Properties of the Group  
48 868 Therapy Experience Scale. *Int J Group Psychother* 2018; 68: 407–427.  
49  
50 869 100. Liang D, Han H, Du J, et al. A pilot study of a smartphone application supporting recovery from drug  
51 870 addiction. *J Subst Abuse Treat* 2018; 88: 51–58.  
52  
53 871 101. Kish L. *Survey sampling*. New York: Wiley, 1965.  
54  
55 872 102. Takano A, Miyamoto Y, Shinozaki T, et al. Effect of a web-based relapse prevention program on  
56 873 abstinence among Japanese drug users: A pilot randomized controlled trial. *J Subst Abuse Treat* 2020;  
57 874 111: 37–46.  
58  
59  
60

- 1  
2  
3 875 103. Iachina M. The evaluation of the performance of IPWGEE, a simulation study. *Communications in*  
4 876 *Statistics - Simulation and Computation* 2009; 38: 1212–1227.  
5  
6 877 104. Carroll KM, Rounsaville BJ, Gordon LT, et al. Psychotherapy and pharmacotherapy for ambulatory  
7 878 cocaine abusers. *Arch Gen Psychiatry* 1994; 51: 177–187.  
8  
9 879 105. Rosenblum A, Magura S, Kayman DJ, et al. Motivationally enhanced group counseling for substance  
10 880 users in a soup kitchen: a randomized clinical trial. *Drug Alcohol Depend* 2005; 80: 91–103.  
11  
12 881 106. Fernandes S, Ferigolo M, Benchaya MC, et al. Brief Motivational Intervention and telemedicine: a new  
13 882 perspective of treatment to marijuana users. *Addict Behav* 2010; 35: 750–755.  
14  
15 883 107. Wongpakaran T, Petcharaj K, Wongpakaran N, et al. The effect of telephone-based intervention (TBI) in  
16 884 alcohol abusers: a pilot study. *J Med Assoc Thai* 2011; 94: 849–856.  
17  
18 885 108. Signor L, Pierozan PS, Ferigolo M, et al. Efficacy of the telephone-based Brief Motivational Intervention  
19 886 for alcohol problems in Brazil. *Braz J Psychiatry* 2013; 35: 254–261.  
20  
21 887 109. Marasinghe RB, Edirippulige S, Kavanagh D, et al. Effect of mobile phone-based psychotherapy in  
22 888 suicide prevention: a randomized controlled trial in Sri Lanka. *J Telemed Telecare* 2012; 18: 151–155.  
23  
24 889 110. Christoff A de O, Boerngen-Lacerda R. Reducing substance involvement in college students: a three-arm  
25 890 parallel-group randomized controlled trial of a computer-based intervention. *Addict Behav* 2015; 45: 164–  
26 891 171.  
27  
28 892 111. Baldin YC, Sanudo A, Sanchez ZM. Effectiveness of a web-based intervention in reducing binge drinking  
29 893 among nightclub patrons. *Rev Saude Publica* 2018; 52: 2.  
30  
31 894 112. Tiburcio M, Lara MA, Martínez N, et al. Web-Based Intervention to Reduce Substance Abuse and  
32 895 Depression: A Three Arm Randomized Trial in Mexico. *Subst Use Misuse* 2018; 53: 2220–2231.  
33  
34 896 113. Zhu Y, Jiang H, Su H, et al. A Newly Designed Mobile-Based Computerized Cognitive Addiction  
35 897 Therapy App for the Improvement of Cognition Impairments and Risk Decision Making in  
36 898 Methamphetamine Use Disorder: Randomized Controlled Trial. *JMIR Mhealth Uhealth* 2018; 6: e10292.  
37  
38 899 114. Rush KL, Howlett L, Munro A, et al. Videoconference compared to telephone in healthcare delivery: A  
39 900 systematic review. *Int J Med Inform* 2018; 118: 44–53.  
40  
41 901 115. Spek V, Cuijpers P, Nyklíček I, et al. Internet-based cognitive behaviour therapy for symptoms of  
42 902 depression and anxiety: a meta-analysis. *Psychol Med* 2007; 37: 319–328.  
43  
44 903 116. Patsopoulos NA. A pragmatic view on pragmatic trials. *Dialogues Clin Neurosci* 2011; 13: 217–224.  
45  
46  
47  
48  
49  
50  
51  
52  
53  
54  
55  
56  
57  
58  
59  
60

905

**Table 1.** Recruitment sites in this study

| Name                          | Location | Type                                          | Treatment as usual                                                                                           | Most reported              |
|-------------------------------|----------|-----------------------------------------------|--------------------------------------------------------------------------------------------------------------|----------------------------|
| Cipto Mangunkusumo Hospital   | Jakarta  | Tertiary national general hospital            | Individual psychotherapy, symptomatic pharmacotherapy                                                        | Benzodiazep                |
| Aceh Mental Hospital          | Aceh     | Tertiary provincial mental hospital           | Individual psychotherapy, symptomatic pharmacotherapy                                                        | Methamphet                 |
| Duren Sawit Regional Hospital | Jakarta  | Tertiary regional general hospital            | Individual psychotherapy, symptomatic pharmacotherapy, opioid substitution therapy (buprenorphine, naloxone) | Opioid                     |
| Karisma Foundation            | Jakarta  | Rehabilitation centre                         | Individual and group peer counselling                                                                        | Methamphet                 |
| Kapeta Foundation             | Banten   | Rehabilitation centre                         | Individual and group peer counselling                                                                        | Methamphet<br>cannabinoids |
| Kios Atma Jaya                | Jakarta  | Rehabilitation centre and regional HIV clinic | Individual psychotherapy, group peer counselling, outreach program                                           | Opioid                     |
| Puskesmas Jatinegara          | Jakarta  | Primary health care                           | Counselling, symptomatic pharmacotherapy, methadone maintenance therapy                                      | Heroin                     |
| Puskesmas Gambir              | Jakarta  | Primary health care                           | Counselling, symptomatic pharmacotherapy, methadone maintenance therapy                                      | Heroin                     |

Counselling focuses on education and giving advice.

Symptomatic pharmacotherapy gives medication for helping patients with specific psychopathologies.

Psychotherapy aims to help a person identify and change their emotions, thoughts, and behaviour.

906

907

908

Table 2. Outcome and measurement

| Outcome                           | Measurement                                                   | Data for analysis                                                                                                                                                     | Type and score range                                                                          | Hypothesis for intervention (vs control)          | Assessment time point |                |                |                |
|-----------------------------------|---------------------------------------------------------------|-----------------------------------------------------------------------------------------------------------------------------------------------------------------------|-----------------------------------------------------------------------------------------------|---------------------------------------------------|-----------------------|----------------|----------------|----------------|
|                                   |                                                               |                                                                                                                                                                       |                                                                                               |                                                   | T1                    | T2             | T3             | T4             |
| <b>Primary outcome</b>            |                                                               |                                                                                                                                                                       |                                                                                               |                                                   |                       |                |                |                |
| Abstinence from primary substance | Timeline followback (TLFB) for the past 28 days               | Number of days being abstinent from primary substance divided by 28 (%).                                                                                              | Continuous, 0 (no use) to 100 (used every day).                                               | Higher                                            | ✓ <sup>a</sup>        | ✓ <sup>a</sup> | ✓ <sup>a</sup> | ✓ <sup>a</sup> |
| <b>Secondary outcomes</b>         |                                                               |                                                                                                                                                                       |                                                                                               |                                                   |                       |                |                |                |
| Addiction severity                | Addiction Severity Index (ASI)                                | 7 composite scores: medical, employment, alcohol use, drug use, legal, family/social, and psychiatric status. Each composite score calculated using standard formula. | Continuous, 0 (no problems) to 1 (severe problems).                                           | Lower                                             | ✓ <sup>a</sup>        | ✓ <sup>a</sup> | ✓ <sup>a</sup> | ✓ <sup>a</sup> |
| Health-related quality of life    | EuroQol-5D (EQ-5D-5L)                                         | Health utility score, calculated from 5 items on mobility, self-care, usual activities, pain/discomfort and anxiety/depression, using Indonesian value set.           | Continuous, -0.865 (impaired health) to 1 (full health).                                      | Higher                                            | ✓ <sup>a</sup>        | ✓ <sup>a</sup> | ✓ <sup>a</sup> | ✓ <sup>a</sup> |
| Motivation to change              | University of Rhode Island Change Assessment (URICA)          | Action stage subscale, sum of 8 items.                                                                                                                                | Continuous, 8 (not active in behavioural change) to 40 (highly active in behavioural change). | Higher                                            | ✓ <sup>a</sup>        | ✓ <sup>a</sup> | ✓ <sup>a</sup> | ✓ <sup>a</sup> |
| Coping                            | Brief-Coping Orientation to Problems Experienced (Brief COPE) | Sum of substance use coping (2 items)                                                                                                                                 | Continuous, 2 (low substance use coping) to 8 (high substance use coping)                     | Lower                                             | ✓ <sup>a</sup>        | ✓ <sup>a</sup> | ✓ <sup>a</sup> | ✓ <sup>a</sup> |
| Psychiatric symptoms              | Symptom Checklist-90 Revised (SCL-90-R)                       | Global Severity Index (GSI), average of 90 items.                                                                                                                     | Continuous, 0 (no symptoms) to 4 (severe symptoms).                                           | Lower                                             | ✓ <sup>a</sup>        | ✓ <sup>a</sup> | ✓ <sup>a</sup> | ✓ <sup>a</sup> |
| Cognitive function                | Rey Auditory Verbal Learning Test (RAVLT)                     | 3 test results; immediate, learning, and recalling.                                                                                                                   | Continuous, 0 (low functioning) to 15 (high functioning).                                     | Higher                                            | ✓ <sup>a</sup>        | ✓ <sup>a</sup> | ✓ <sup>a</sup> | ✓ <sup>a</sup> |
| Internalised stigma               | Internalized Stigma of Mental Illness (ISMI)                  | Sum of 4 subscales: alienation, stereotype endorsement, social withdrawal, and stigma resistances.                                                                    | Continuous, 24 (low internalised stigma) to 96 (high internalised stigma)                     | Lower                                             | ✓ <sup>a</sup>        | ✓ <sup>a</sup> | ✓ <sup>a</sup> | ✓ <sup>a</sup> |
| <b>Implementation outcomes</b>    |                                                               |                                                                                                                                                                       |                                                                                               |                                                   |                       |                |                |                |
| Retention in treatment            | Self-reporting for the past 3 months                          | Coded as 'retained' if they had therapeutic contacts in at least 75% of the planned number of therapeutic contacts.                                                   | Categorical, 'retained' = 1, 'not retained' = 0.                                              | More 'retained'                                   | ✓ <sup>a</sup>        | ✓ <sup>a</sup> | ✓ <sup>a</sup> | ✓ <sup>a</sup> |
| Treatment satisfaction            | Client Satisfaction Questionnaire-3 (CSQ-3)                   | Sum of 3 items.                                                                                                                                                       | Continuous, 4 (not satisfied) to 12 (satisfied).                                              | Higher                                            | ✓ <sup>a</sup>        |                |                |                |
| Group cohesion                    | Group Therapy Experience Scale (GTES)                         | Sum of 16 items.                                                                                                                                                      | Continuous, 16 (poor cohesion) to 80 (great cohesion).                                        | Not applicable: measured only in intervention arm | ✓ <sup>a</sup>        |                |                |                |

---

<sup>a</sup> Objective validation by urine drug test for 8 substances: alcohol, amphetamine, morphine, cannabinoids, methamphetamine, benzodiazepine, cocaine, synthetic cannabinoids

1  
2  
3  
4  
5  
6  
7  
8  
9  
10  
11  
12  
13  
14  
15  
16  
17  
18  
19  
20  
21  
22  
23  
24  
25  
26  
27  
28  
29  
30  
31  
32  
33  
34  
35  
36  
37  
38  
39  
40  
41  
42  
43  
44  
45  
46  
47

For peer review only

1  
2  
3  
4  
5  
6  
7  
8  
9  
10  
11  
12  
13  
14  
15  
16  
17  
18  
19  
20  
21  
22  
23  
24  
25  
26  
27  
28  
29  
30  
31  
32  
33  
34  
35  
36  
37  
38  
39  
40  
41  
42  
43  
44  
45  
46  
47

For peer review only

1  
2  
3  
4  
5  
6  
7  
8  
9  
10  
11  
12  
13  
14  
15  
16  
17  
18  
19  
20  
21  
22  
23  
24  
25  
26  
27  
28  
29  
30  
31  
32  
33  
34  
35  
36  
37  
38  
39  
40  
41  
42  
43  
44  
45  
46  
47

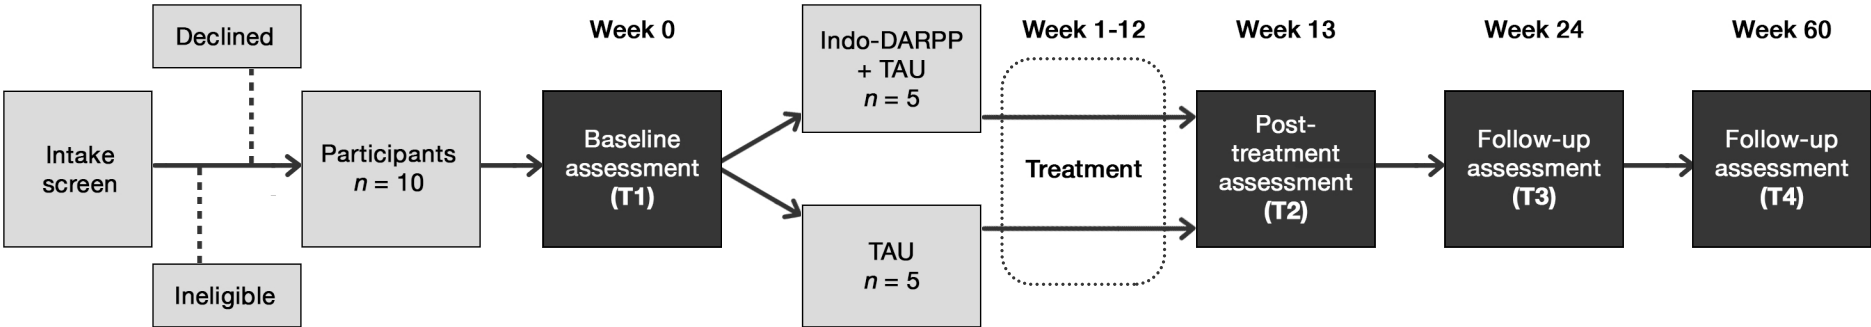



Weeks

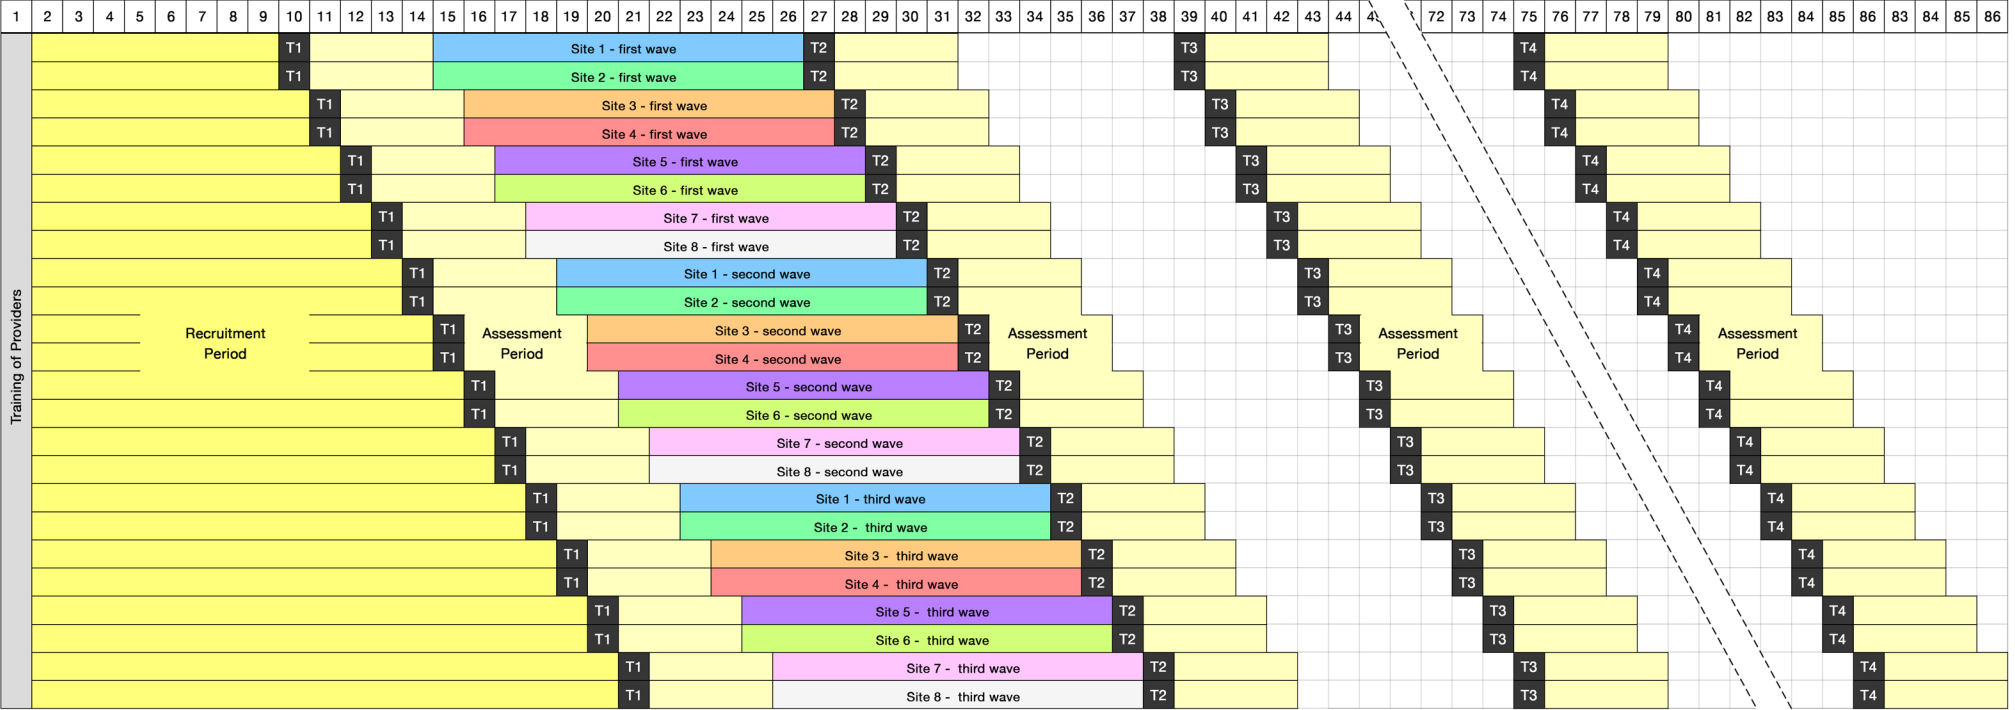

# Reporting checklist for protocol of a clinical trial.

Based on the SPIRIT guidelines.

## Instructions to authors

Complete this checklist by entering the page numbers from your manuscript where readers will find each of the items listed below.

Your article may not currently address all the items on the checklist. Please modify your text to include the missing information. If you are certain that an item does not apply, please write "n/a" and provide a short explanation.

Upload your completed checklist as an extra file when you submit to a journal.

In your methods section, say that you used the SPIRIT reporting guidelines, and cite them as:

Chan A-W, Tetzlaff JM, Gøtzsche PC, Altman DG, Mann H, Berlin J, Dickersin K, Hróbjartsson A, Schulz KF, Parulekar WR, Krleža-Jerić K, Laupacis A, Moher D. SPIRIT 2013 Explanation and Elaboration: Guidance for protocols of clinical trials. *BMJ*. 2013;346:e7586

|                                   |                     | Reporting Item                                                                                               | Page Number                                       |
|-----------------------------------|---------------------|--------------------------------------------------------------------------------------------------------------|---------------------------------------------------|
| <b>Administrative information</b> |                     |                                                                                                              |                                                   |
| Title                             | <a href="#">#1</a>  | Descriptive title identifying the study design, population, interventions, and, if applicable, trial acronym | 1                                                 |
| Trial registration                | <a href="#">#2a</a> | Trial identifier and registry name. If not yet registered, name of intended registry                         | 4, 23                                             |
| Trial registration: data set      | <a href="#">#2b</a> | All items from the World Health Organization Trial Registration Data Set                                     | n/a, trial already registered as described in 2a. |
| Protocol version                  | <a href="#">#3</a>  | Date and version identifier                                                                                  | 23                                                |
| Funding                           | <a href="#">#4</a>  | Sources and types of financial, material, and other support                                                  | 26-27                                             |
| Roles and                         | <a href="#">#5a</a> | Names, affiliations, and roles of protocol                                                                   | 26                                                |

|    |                      |                     |                                                    |
|----|----------------------|---------------------|----------------------------------------------------|
| 1  | responsibilities:    | contributors        |                                                    |
| 2  | contributorship      |                     |                                                    |
| 3  |                      |                     |                                                    |
| 4  | Roles and            | <a href="#">#5b</a> | Name and contact information for the trial         |
| 5  | responsibilities:    |                     | sponsor                                            |
| 6  | sponsor contact      |                     |                                                    |
| 7  | information          |                     |                                                    |
| 8  |                      |                     |                                                    |
| 9  |                      |                     |                                                    |
| 10 |                      |                     |                                                    |
| 11 | Roles and            | <a href="#">#5c</a> | Role of study sponsor and funders, if any, in      |
| 12 | responsibilities:    |                     | study design; collection, management,              |
| 13 | sponsor and funder   |                     | analysis, and interpretation of data; writing of   |
| 14 |                      |                     | the report; and the decision to submit the         |
| 15 |                      |                     | report for publication, including whether they     |
| 16 |                      |                     | will have ultimate authority over any of these     |
| 17 |                      |                     | activities                                         |
| 18 |                      |                     |                                                    |
| 19 |                      |                     |                                                    |
| 20 |                      |                     |                                                    |
| 21 |                      |                     |                                                    |
| 22 |                      |                     |                                                    |
| 23 | Roles and            | <a href="#">#5d</a> | Composition, roles, and responsibilities of the    |
| 24 | responsibilities:    |                     | coordinating centre, steering committee,           |
| 25 | committees           |                     | endpoint adjudication committee, data              |
| 26 |                      |                     | management team, and other individuals or          |
| 27 |                      |                     | groups overseeing the trial, if applicable (see    |
| 28 |                      |                     | Item 21a for data monitoring committee)            |
| 29 |                      |                     |                                                    |
| 30 |                      |                     |                                                    |
| 31 |                      |                     |                                                    |
| 32 |                      |                     |                                                    |
| 33 | <b>Introduction</b>  |                     |                                                    |
| 34 |                      |                     |                                                    |
| 35 | Background and       | <a href="#">#6a</a> | Description of research question and               |
| 36 | rationale            |                     | justification for undertaking the trial, including |
| 37 |                      |                     | summary of relevant studies (published and         |
| 38 |                      |                     | unpublished) examining benefits and harms          |
| 39 |                      |                     | for each intervention                              |
| 40 |                      |                     |                                                    |
| 41 |                      |                     |                                                    |
| 42 |                      |                     |                                                    |
| 43 |                      |                     |                                                    |
| 44 | Background and       | <a href="#">#6b</a> | Explanation for choice of comparators              |
| 45 | rationale: choice of |                     |                                                    |
| 46 | comparators          |                     |                                                    |
| 47 |                      |                     |                                                    |
| 48 |                      |                     |                                                    |
| 49 | Objectives           | <a href="#">#7</a>  | Specific objectives or hypotheses                  |
| 50 |                      |                     |                                                    |
| 51 |                      |                     |                                                    |
| 52 | Trial design         | <a href="#">#8</a>  | Description of trial design including type of      |
| 53 |                      |                     | trial (eg, parallel group, crossover, factorial,   |
| 54 |                      |                     | single group), allocation ratio, and framework     |
| 55 |                      |                     | (eg, superiority, equivalence, non-inferiority,    |
| 56 |                      |                     | exploratory)                                       |
| 57 |                      |                     |                                                    |
| 58 |                      |                     |                                                    |
| 59 |                      |                     |                                                    |
| 60 |                      |                     |                                                    |

1 **Methods:**

2 **Participants,**

3 **interventions, and**

4 **outcomes**

|    |                      |                      |                                                       |
|----|----------------------|----------------------|-------------------------------------------------------|
| 5  |                      |                      |                                                       |
| 6  |                      |                      |                                                       |
| 7  |                      |                      |                                                       |
| 8  | Study setting        | <a href="#">#9</a>   | Description of study settings (eg, community          |
| 9  |                      |                      | clinic, academic hospital) and list of countries      |
| 10 |                      |                      | where data will be collected. Reference to            |
| 11 |                      |                      | where list of study sites can be obtained             |
| 12 |                      |                      |                                                       |
| 13 |                      |                      |                                                       |
| 14 |                      |                      |                                                       |
| 15 | Eligibility criteria | <a href="#">#10</a>  | Inclusion and exclusion criteria for                  |
| 16 |                      |                      | participants. If applicable, eligibility criteria for |
| 17 |                      |                      | study centres and individuals who will                |
| 18 |                      |                      | perform the interventions (eg, surgeons,              |
| 19 |                      |                      | psychotherapists)                                     |
| 20 |                      |                      |                                                       |
| 21 |                      |                      |                                                       |
| 22 |                      |                      |                                                       |
| 23 |                      |                      |                                                       |
| 24 | Interventions:       | <a href="#">#11a</a> | Interventions for each group with sufficient          |
| 25 | description          |                      | detail to allow replication, including how and        |
| 26 |                      |                      | when they will be administered                        |
| 27 |                      |                      |                                                       |
| 28 |                      |                      |                                                       |
| 29 | Interventions:       | <a href="#">#11b</a> | Criteria for discontinuing or modifying               |
| 30 | modifications        |                      | allocated interventions for a given trial             |
| 31 |                      |                      | participant (eg, drug dose change in                  |
| 32 |                      |                      | response to harms, participant request, or            |
| 33 |                      |                      | improving / worsening disease)                        |
| 34 |                      |                      |                                                       |
| 35 |                      |                      |                                                       |
| 36 |                      |                      |                                                       |
| 37 |                      |                      |                                                       |
| 38 | Interventions:       | <a href="#">#11c</a> | Strategies to improve adherence to                    |
| 39 | adherence            |                      | intervention protocols, and any procedures            |
| 40 |                      |                      | for monitoring adherence (eg, drug tablet             |
| 41 |                      |                      | return; laboratory tests)                             |
| 42 |                      |                      |                                                       |
| 43 |                      |                      |                                                       |
| 44 |                      |                      |                                                       |
| 45 | Interventions:       | <a href="#">#11d</a> | Relevant concomitant care and interventions           |
| 46 | concomitant care     |                      | that are permitted or prohibited during the           |
| 47 |                      |                      | trial                                                 |
| 48 |                      |                      |                                                       |
| 49 |                      |                      |                                                       |
| 50 |                      |                      |                                                       |
| 51 | Outcomes             | <a href="#">#12</a>  | Primary, secondary, and other outcomes,               |
| 52 |                      |                      | including the specific measurement variable           |
| 53 |                      |                      | (eg, systolic blood pressure), analysis metric        |
| 54 |                      |                      | (eg, change from baseline, final value, time to       |
| 55 |                      |                      | event), method of aggregation (eg, median,            |
| 56 |                      |                      | proportion), and time point for each outcome.         |
| 57 |                      |                      |                                                       |
| 58 |                      |                      |                                                       |
| 59 |                      |                      |                                                       |
| 60 |                      |                      |                                                       |

|    |                           |                                                                   |            |
|----|---------------------------|-------------------------------------------------------------------|------------|
| 1  |                           | Explanation of the clinical relevance of                          |            |
| 2  |                           | chosen efficacy and harm outcomes is                              |            |
| 3  |                           | strongly recommended                                              |            |
| 4  |                           |                                                                   |            |
| 5  |                           |                                                                   |            |
| 6  | Participant timeline      | <a href="#">#13</a> Time schedule of enrolment, interventions     | 10, 19, 26 |
| 7  |                           | (including any run-ins and washouts),                             |            |
| 8  |                           | assessments, and visits for participants. A                       |            |
| 9  |                           | schematic diagram is highly recommended                           |            |
| 10 |                           | (see Figure)                                                      |            |
| 11 |                           |                                                                   |            |
| 12 |                           |                                                                   |            |
| 13 |                           |                                                                   |            |
| 14 | Sample size               | <a href="#">#14</a> Estimated number of participants needed to    | 20         |
| 15 |                           | achieve study objectives and how it was                           |            |
| 16 |                           | determined, including clinical and statistical                    |            |
| 17 |                           | assumptions supporting any sample size                            |            |
| 18 |                           | calculations                                                      |            |
| 19 |                           |                                                                   |            |
| 20 |                           |                                                                   |            |
| 21 |                           |                                                                   |            |
| 22 |                           |                                                                   |            |
| 23 | Recruitment               | <a href="#">#15</a> Strategies for achieving adequate participant | 11         |
| 24 |                           | enrolment to reach target sample size                             |            |
| 25 |                           |                                                                   |            |
| 26 |                           |                                                                   |            |
| 27 | <b>Methods:</b>           |                                                                   |            |
| 28 | <b>Assignment of</b>      |                                                                   |            |
| 29 | <b>interventions (for</b> |                                                                   |            |
| 30 | <b>controlled trials)</b> |                                                                   |            |
| 31 |                           |                                                                   |            |
| 32 |                           |                                                                   |            |
| 33 |                           |                                                                   |            |
| 34 | Allocation:               | <a href="#">#16a</a> Method of generating the allocation          | 12         |
| 35 | sequence                  | sequence (eg, computer-generated random                           |            |
| 36 | generation                | numbers), and list of any factors for                             |            |
| 37 |                           | stratification. To reduce predictability of a                     |            |
| 38 |                           | random sequence, details of any planned                           |            |
| 39 |                           | restriction (eg, blocking) should be provided                     |            |
| 40 |                           | in a separate document that is unavailable to                     |            |
| 41 |                           | those who enrol participants or assign                            |            |
| 42 |                           | interventions                                                     |            |
| 43 |                           |                                                                   |            |
| 44 |                           |                                                                   |            |
| 45 |                           |                                                                   |            |
| 46 |                           |                                                                   |            |
| 47 |                           |                                                                   |            |
| 48 |                           |                                                                   |            |
| 49 | Allocation                | <a href="#">#16b</a> Mechanism of implementing the allocation     | 12         |
| 50 | concealment               | sequence (eg, central telephone; sequentially                     |            |
| 51 | mechanism                 | numbered, opaque, sealed envelopes),                              |            |
| 52 |                           | describing any steps to conceal the                               |            |
| 53 |                           | sequence until interventions are assigned                         |            |
| 54 |                           |                                                                   |            |
| 55 |                           |                                                                   |            |
| 56 |                           |                                                                   |            |
| 57 | Allocation:               | <a href="#">#16c</a> Who will generate the allocation sequence,   | 12         |
| 58 |                           |                                                                   |            |
| 59 |                           |                                                                   |            |
| 60 |                           |                                                                   |            |

|    |                        |                      |                                                |                         |
|----|------------------------|----------------------|------------------------------------------------|-------------------------|
| 1  | implementation         |                      | who will enrol participants, and who will      |                         |
| 2  |                        |                      | assign participants to interventions           |                         |
| 3  |                        |                      |                                                |                         |
| 4  | Blinding (masking)     | <a href="#">#17a</a> | Who will be blinded after assignment to        | 12, 19                  |
| 5  |                        |                      | interventions (eg, trial participants, care    |                         |
| 6  |                        |                      | providers, outcome assessors, data             |                         |
| 7  |                        |                      | analysts), and how                             |                         |
| 8  |                        |                      |                                                |                         |
| 9  |                        |                      |                                                |                         |
| 10 |                        |                      |                                                |                         |
| 11 | Blinding (masking):    | <a href="#">#17b</a> | If blinded, circumstances under which          | n/a, only assessors are |
| 12 | emergency              |                      | unblinding is permissible, and procedure for   | blinded                 |
| 13 | unblinding             |                      | revealing a participant's allocated            |                         |
| 14 |                        |                      | intervention during the trial                  |                         |
| 15 |                        |                      |                                                |                         |
| 16 |                        |                      |                                                |                         |
| 17 |                        |                      |                                                |                         |
| 18 | <b>Methods: Data</b>   |                      |                                                |                         |
| 19 | <b>collection,</b>     |                      |                                                |                         |
| 20 | <b>management, and</b> |                      |                                                |                         |
| 21 | <b>analysis</b>        |                      |                                                |                         |
| 22 |                        |                      |                                                |                         |
| 23 |                        |                      |                                                |                         |
| 24 |                        |                      |                                                |                         |
| 25 | Data collection plan   | <a href="#">#18a</a> | Plans for assessment and collection of         | 15-19                   |
| 26 |                        |                      | outcome, baseline, and other trial data,       |                         |
| 27 |                        |                      | including any related processes to promote     |                         |
| 28 |                        |                      | data quality (eg, duplicate measurements,      |                         |
| 29 |                        |                      | training of assessors) and a description of    |                         |
| 30 |                        |                      | study instruments (eg, questionnaires,         |                         |
| 31 |                        |                      | laboratory tests) along with their reliability |                         |
| 32 |                        |                      | and validity, if known. Reference to where     |                         |
| 33 |                        |                      | data collection forms can be found, if not in  |                         |
| 34 |                        |                      | the protocol                                   |                         |
| 35 |                        |                      |                                                |                         |
| 36 |                        |                      |                                                |                         |
| 37 |                        |                      |                                                |                         |
| 38 |                        |                      |                                                |                         |
| 39 |                        |                      |                                                |                         |
| 40 |                        |                      |                                                |                         |
| 41 |                        |                      |                                                |                         |
| 42 | Data collection plan:  | <a href="#">#18b</a> | Plans to promote participant retention and     | 19, 22-23               |
| 43 | retention              |                      | complete follow-up, including list of any      |                         |
| 44 |                        |                      | outcome data to be collected for participants  |                         |
| 45 |                        |                      | who discontinue or deviate from intervention   |                         |
| 46 |                        |                      | protocols                                      |                         |
| 47 |                        |                      |                                                |                         |
| 48 |                        |                      |                                                |                         |
| 49 |                        |                      |                                                |                         |
| 50 |                        |                      |                                                |                         |
| 51 | Data management        | <a href="#">#19</a>  | Plans for data entry, coding, security, and    | 23                      |
| 52 |                        |                      | storage, including any related processes to    |                         |
| 53 |                        |                      | promote data quality (eg, double data entry;   |                         |
| 54 |                        |                      | range checks for data values). Reference to    |                         |
| 55 |                        |                      | where details of data management               |                         |
| 56 |                        |                      | procedures can be found, if not in the         |                         |
| 57 |                        |                      |                                                |                         |
| 58 |                        |                      |                                                |                         |
| 59 |                        |                      |                                                |                         |
| 60 |                        |                      |                                                |                         |

|    |                                                  |                                                                                                                                                                                                                                                                                                                                                            |                                                                                                               |
|----|--------------------------------------------------|------------------------------------------------------------------------------------------------------------------------------------------------------------------------------------------------------------------------------------------------------------------------------------------------------------------------------------------------------------|---------------------------------------------------------------------------------------------------------------|
| 1  |                                                  | protocol                                                                                                                                                                                                                                                                                                                                                   |                                                                                                               |
| 2  |                                                  |                                                                                                                                                                                                                                                                                                                                                            |                                                                                                               |
| 3  | Statistics: outcomes                             | <a href="#">#20a</a> Statistical methods for analysing primary and secondary outcomes. Reference to where other details of the statistical analysis plan can be found, if not in the protocol                                                                                                                                                              | 20-22                                                                                                         |
| 4  |                                                  |                                                                                                                                                                                                                                                                                                                                                            |                                                                                                               |
| 5  |                                                  |                                                                                                                                                                                                                                                                                                                                                            |                                                                                                               |
| 6  |                                                  |                                                                                                                                                                                                                                                                                                                                                            |                                                                                                               |
| 7  |                                                  |                                                                                                                                                                                                                                                                                                                                                            |                                                                                                               |
| 8  |                                                  |                                                                                                                                                                                                                                                                                                                                                            |                                                                                                               |
| 9  |                                                  |                                                                                                                                                                                                                                                                                                                                                            |                                                                                                               |
| 10 | Statistics: additional analyses                  | <a href="#">#20b</a> Methods for any additional analyses (eg, subgroup and adjusted analyses)                                                                                                                                                                                                                                                              | 21-22                                                                                                         |
| 11 |                                                  |                                                                                                                                                                                                                                                                                                                                                            |                                                                                                               |
| 12 |                                                  |                                                                                                                                                                                                                                                                                                                                                            |                                                                                                               |
| 13 |                                                  |                                                                                                                                                                                                                                                                                                                                                            |                                                                                                               |
| 14 | Statistics: analysis population and missing data | <a href="#">#20c</a> Definition of analysis population relating to protocol non-adherence (eg, as randomised analysis), and any statistical methods to handle missing data (eg, multiple imputation)                                                                                                                                                       | 21                                                                                                            |
| 15 |                                                  |                                                                                                                                                                                                                                                                                                                                                            |                                                                                                               |
| 16 |                                                  |                                                                                                                                                                                                                                                                                                                                                            |                                                                                                               |
| 17 |                                                  |                                                                                                                                                                                                                                                                                                                                                            |                                                                                                               |
| 18 |                                                  |                                                                                                                                                                                                                                                                                                                                                            |                                                                                                               |
| 19 |                                                  |                                                                                                                                                                                                                                                                                                                                                            |                                                                                                               |
| 20 |                                                  |                                                                                                                                                                                                                                                                                                                                                            |                                                                                                               |
| 21 | <b>Methods:</b>                                  |                                                                                                                                                                                                                                                                                                                                                            |                                                                                                               |
| 22 | <b>Monitoring</b>                                |                                                                                                                                                                                                                                                                                                                                                            |                                                                                                               |
| 23 |                                                  |                                                                                                                                                                                                                                                                                                                                                            |                                                                                                               |
| 24 |                                                  |                                                                                                                                                                                                                                                                                                                                                            |                                                                                                               |
| 25 | Data monitoring: formal committee                | <a href="#">#21a</a> Composition of data monitoring committee (DMC); summary of its role and reporting structure; statement of whether it is independent from the sponsor and competing interests; and reference to where further details about its charter can be found, if not in the protocol. Alternatively, an explanation of why a DMC is not needed | 23, DMC will not be convened as the intervention involves a short-term psychotherapy with known minimal risk. |
| 26 |                                                  |                                                                                                                                                                                                                                                                                                                                                            |                                                                                                               |
| 27 |                                                  |                                                                                                                                                                                                                                                                                                                                                            |                                                                                                               |
| 28 |                                                  |                                                                                                                                                                                                                                                                                                                                                            |                                                                                                               |
| 29 |                                                  |                                                                                                                                                                                                                                                                                                                                                            |                                                                                                               |
| 30 |                                                  |                                                                                                                                                                                                                                                                                                                                                            |                                                                                                               |
| 31 |                                                  |                                                                                                                                                                                                                                                                                                                                                            |                                                                                                               |
| 32 |                                                  |                                                                                                                                                                                                                                                                                                                                                            |                                                                                                               |
| 33 |                                                  |                                                                                                                                                                                                                                                                                                                                                            |                                                                                                               |
| 34 |                                                  |                                                                                                                                                                                                                                                                                                                                                            |                                                                                                               |
| 35 |                                                  |                                                                                                                                                                                                                                                                                                                                                            |                                                                                                               |
| 36 |                                                  |                                                                                                                                                                                                                                                                                                                                                            |                                                                                                               |
| 37 |                                                  |                                                                                                                                                                                                                                                                                                                                                            |                                                                                                               |
| 38 | Data monitoring: interim analysis                | <a href="#">#21b</a> Description of any interim analyses and stopping guidelines, including who will have access to these interim results and make the final decision to terminate the trial                                                                                                                                                               | 23, interim analysis is not planned due to the short duration of intervention.                                |
| 39 |                                                  |                                                                                                                                                                                                                                                                                                                                                            |                                                                                                               |
| 40 |                                                  |                                                                                                                                                                                                                                                                                                                                                            |                                                                                                               |
| 41 |                                                  |                                                                                                                                                                                                                                                                                                                                                            |                                                                                                               |
| 42 |                                                  |                                                                                                                                                                                                                                                                                                                                                            |                                                                                                               |
| 43 |                                                  |                                                                                                                                                                                                                                                                                                                                                            |                                                                                                               |
| 44 |                                                  |                                                                                                                                                                                                                                                                                                                                                            |                                                                                                               |
| 45 | Harms                                            | <a href="#">#22</a> Plans for collecting, assessing, reporting, and managing solicited and spontaneously reported adverse events and other unintended effects of trial interventions or trial conduct                                                                                                                                                      | 22-23                                                                                                         |
| 46 |                                                  |                                                                                                                                                                                                                                                                                                                                                            |                                                                                                               |
| 47 |                                                  |                                                                                                                                                                                                                                                                                                                                                            |                                                                                                               |
| 48 |                                                  |                                                                                                                                                                                                                                                                                                                                                            |                                                                                                               |
| 49 |                                                  |                                                                                                                                                                                                                                                                                                                                                            |                                                                                                               |
| 50 |                                                  |                                                                                                                                                                                                                                                                                                                                                            |                                                                                                               |
| 51 |                                                  |                                                                                                                                                                                                                                                                                                                                                            |                                                                                                               |
| 52 |                                                  |                                                                                                                                                                                                                                                                                                                                                            |                                                                                                               |
| 53 |                                                  |                                                                                                                                                                                                                                                                                                                                                            |                                                                                                               |
| 54 | Auditing                                         | <a href="#">#23</a> Frequency and procedures for auditing trial conduct, if any, and whether the process will be independent from investigators and the sponsor                                                                                                                                                                                            | 23, there will be no auditing process by independent investigators.                                           |
| 55 |                                                  |                                                                                                                                                                                                                                                                                                                                                            |                                                                                                               |
| 56 |                                                  |                                                                                                                                                                                                                                                                                                                                                            |                                                                                                               |
| 57 |                                                  |                                                                                                                                                                                                                                                                                                                                                            |                                                                                                               |
| 58 |                                                  |                                                                                                                                                                                                                                                                                                                                                            |                                                                                                               |
| 59 |                                                  |                                                                                                                                                                                                                                                                                                                                                            |                                                                                                               |
| 60 |                                                  |                                                                                                                                                                                                                                                                                                                                                            |                                                                                                               |

## Ethics and dissemination

|                                      |                      |                                                                                                                                                                                                                                    |                                                                                           |
|--------------------------------------|----------------------|------------------------------------------------------------------------------------------------------------------------------------------------------------------------------------------------------------------------------------|-------------------------------------------------------------------------------------------|
| Research ethics approval             | <a href="#">#24</a>  | Plans for seeking research ethics committee / institutional review board (REC / IRB) approval                                                                                                                                      | 23, 28                                                                                    |
| Protocol amendments                  | <a href="#">#25</a>  | Plans for communicating important protocol modifications (eg, changes to eligibility criteria, outcomes, analyses) to relevant parties (eg, investigators, REC / IRBs, trial participants, trial registries, journals, regulators) | 23                                                                                        |
| Consent or assent                    | <a href="#">#26a</a> | Who will obtain informed consent or assent from potential trial participants or authorised surrogates, and how (see Item 32)                                                                                                       | 23                                                                                        |
| Consent or assent: ancillary studies | <a href="#">#26b</a> | Additional consent provisions for collection and use of participant data and biological specimens in ancillary studies, if applicable                                                                                              | 23                                                                                        |
| Confidentiality                      | <a href="#">#27</a>  | How personal information about potential and enrolled participants will be collected, shared, and maintained in order to protect confidentiality before, during, and after the trial                                               | 23                                                                                        |
| Declaration of interests             | <a href="#">#28</a>  | Financial and other competing interests for principal investigators for the overall trial and each study site                                                                                                                      | 27                                                                                        |
| Data access                          | <a href="#">#29</a>  | Statement of who will have access to the final trial dataset, and disclosure of contractual agreements that limit such access for investigators                                                                                    | 28                                                                                        |
| Ancillary and post trial care        | <a href="#">#30</a>  | Provisions, if any, for ancillary and post-trial care, and for compensation to those who suffer harm from trial participation                                                                                                      | 15, CBT intervention will be made available for control group after the end of the study. |



|    |                       |                      |                                                   |        |
|----|-----------------------|----------------------|---------------------------------------------------|--------|
| 1  | Dissemination         | <a href="#">#31a</a> | Plans for investigators and sponsor to            | 23     |
| 2  | policy: trial results |                      | communicate trial results to participants,        |        |
| 3  |                       |                      | healthcare professionals, the public, and         |        |
| 4  |                       |                      | other relevant groups (eg, via publication,       |        |
| 5  |                       |                      | reporting in results databases, or other data     |        |
| 6  |                       |                      | sharing arrangements), including any              |        |
| 7  |                       |                      | publication restrictions                          |        |
| 8  |                       |                      |                                                   |        |
| 9  |                       |                      |                                                   |        |
| 10 |                       |                      |                                                   |        |
| 11 |                       |                      |                                                   |        |
| 12 |                       |                      |                                                   |        |
| 13 | Dissemination         | <a href="#">#31b</a> | Authorship eligibility guidelines and any         | 26-27  |
| 14 | policy: authorship    |                      | intended use of professional writers              |        |
| 15 |                       |                      |                                                   |        |
| 16 |                       |                      |                                                   |        |
| 17 | Dissemination         | <a href="#">#31c</a> | Plans, if any, for granting public access to the  | 28     |
| 18 | policy: reproducible  |                      | full protocol, participant-level dataset, and     |        |
| 19 | research              |                      | statistical code                                  |        |
| 20 |                       |                      |                                                   |        |
| 21 |                       |                      |                                                   |        |
| 22 | <b>Appendices</b>     |                      |                                                   |        |
| 23 |                       |                      |                                                   |        |
| 24 |                       |                      |                                                   |        |
| 25 | Informed consent      | <a href="#">#32</a>  | Model consent form and other related              | 11, 23 |
| 26 | materials             |                      | documentation given to participants and           |        |
| 27 |                       |                      | authorised surrogates                             |        |
| 28 |                       |                      |                                                   |        |
| 29 |                       |                      |                                                   |        |
| 30 | Biological            | <a href="#">#33</a>  | Plans for collection, laboratory evaluation,      | 16     |
| 31 | specimens             |                      | and storage of biological specimens for           |        |
| 32 |                       |                      | genetic or molecular analysis in the current      |        |
| 33 |                       |                      | trial and for future use in ancillary studies, if |        |
| 34 |                       |                      | applicable                                        |        |
| 35 |                       |                      |                                                   |        |
| 36 |                       |                      |                                                   |        |
| 37 |                       |                      |                                                   |        |
| 38 |                       |                      |                                                   |        |

#### Notes:

- 2b: n/a, trial already registered as described in 2a.
- 5b: n/a, no trial sponsor.
- 5c: n/a, no involvement of funders in the study design.
- 5d: n/a, no direct intervention in the study design by the host universities.
- 17b: n/a, only assessors are blinded
- 21a: 23, DMC will not be convened as the intervention involves a short-term psychotherapy with known minimal risk.
- 21b: 23, interim analysis is not planned due to the short duration of intervention.

- 23: 23, there will be no auditing process by independent investigators.
- 30: 15, CBT intervention will be made available for control group after the end of the study. The SPIRIT Explanation and Elaboration paper is distributed under the terms of the Creative Commons Attribution License CC-BY-NC. This checklist was completed on 15. February 2021 using <https://www.goodreports.org/>, a tool made by the [EQUATOR Network](#) in collaboration with [Penelope.ai](#)

For peer review only

## Supplementary file 2

**Research Participation Consent Form**

Title of the Research:

Effectiveness of a cognitive behavioral therapy for drug use disorders in Indonesia: A randomized controlled trial

(Collaboration research between the Faculty of Medicine, University of Indonesia and Kyoto University)

An explanation has been given which includes the following discussion :

- |                                                               |                                                                                                                  |
|---------------------------------------------------------------|------------------------------------------------------------------------------------------------------------------|
| 1. Research Title                                             | 18. General management of drug addiction patients outside of research interventions                              |
| 2. Research Clearance                                         | 19. Follow up management after the research ends                                                                 |
| 3. Research institutes and researchers                        | 20. Report of the participant's genetic information                                                              |
| 4. Research purposes                                          | 21. Compensation for illness related to research and invasive procedures                                         |
| 5. Research procedure                                         | 22. Secondary research data for other institutions                                                               |
| 6. Research period                                            | 23. Samples and participant information related to invasive procedures                                           |
| 7. Inclusion Criteria                                         | 24. Name, position, and affiliation of the person in charge of managing data and information related to research |
| 8. Risks, benefits, and side effects                          | 25. CBT group participant commitments and drop out possibility of research participation                         |
| 9. Right to refuse and drop out                               |                                                                                                                  |
| 10. Voluntary participation and risk of involvement           |                                                                                                                  |
| 11. Research data publication                                 |                                                                                                                  |
| 12. How to access research-related materials for participants |                                                                                                                  |
| 13. Privacy of personal data                                  |                                                                                                                  |
| 14. Research data storage                                     |                                                                                                                  |
| 15. Research funds and conflicts of interest                  |                                                                                                                  |
| 16. Researcher contact list                                   |                                                                                                                  |
| 17. Remuneration for participants                             |                                                                                                                  |

Explanations have been given according to the explanation sheet, and consent has been obtained voluntarily.

Date of consent : \_\_\_\_ / \_\_\_\_ / 20 \_\_\_\_

Researcher's affiliation : \_\_\_\_\_

Researcher's Name :

Researcher's Signature :

Acknowledged by:

1. Dean of the Faculty Medicine, University Indonesia
2. Director of the *Center for South East Asian Studies, Kyoto University*

## Supplementary file 2

**CBT-Group Participation Consent Form**

I, the undersigned, hereby acknowledge, consent and agree to fulfill the following matters during my participation in CBT group therapy, in order to ensure the safe and secure continuation of the program:

1. I will not divulge information about other participants in the group to external parties without the consent of the parties concerned.
2. I will not record audio, video, or take camera pictures without the permission of the parties concerned and the research team.
3. I will not use drugs during the CBT session.
4. I will not divulge links (URL), ID, and passwords for online meetings in the Zoom application to external parties, without the approval of the research team.
5. I will not harass, say offensive words related to ethnicity, religion and race, or commit acts of violence for any reason to any party related to the research, whether other participants or the research team.

If I infringe the points of the agreement above, I will be given 1 (one) warning. If I do not show any improvement after being warned, or infringe it for the second time, or it is deemed that my participation will interfere with the continuation of CBT therapy in the future, I have no objection to my participation being unilaterally terminated.

I, the undersigned, hereby declare that I have understood the explanation given and agree to my participation in the research mentioned above. In my behavior after being warned, or infringe it for the second time, or it is deemed that my participation will interfere with the continuation of CBT therapy in the future, I have no objection to my participation being unilaterally terminated.

Date of Consent : \_\_\_\_ / \_\_\_\_\_ / 20 \_\_\_\_

Name : \_\_\_\_\_

Signature : \_\_\_\_\_

## Supplementary file 2

**Urine Test Informed Consent**

Title of Research:

Effectiveness of a cognitive behavioral therapy for drug use disorders in Indonesia: A randomized controlled trial

(Collaboration research between the Faculty of Medicine, University of Indonesia and Kyoto University)

An explanation has been given which includes the following discussion:

1. Purpose of the urine sampling
2. Urine test procedure
3. Analysis of urine test results data and maintaining data confidentiality

Explanations have been given according to the explanation sheet, and consent has been obtained voluntarily.

I, the undersigned, declare that I

**Agree / do not agree**

\*please circle one of these options above

...to provide the urine sample to be tested for the research team, and I have acknowledged and understood the purposes, procedures and data analysis as described previously.

Date of consent : \_\_\_\_ / \_\_\_\_\_ / 20 \_\_\_\_

Name : \_\_\_\_\_

Signature : \_\_\_\_\_

## Supplementary file 2

**Withdrawal of Informed Consent for Urine Test**

Title of the research:

Effectiveness of a cognitive behavioral therapy for drug use disorders in Indonesia: A randomized controlled trial

(Collaboration research between the Faculty of Medicine, University of Indonesia and Kyoto University)

I, the undersigned, hereby wish to withdraw my prior consent to participate in the urinary test for this research by signing this form.

Withdrawal Date : \_\_\_\_ / \_\_\_\_\_ / 20 \_\_\_\_

Participant's Name : \_\_\_\_\_

Participant's Signature : \_\_\_\_\_

## Supplementary file 3

**Table of contents of Indo-DARPP (English translation)**

| <b>Chapter no.</b> | <b>Chapter title</b>                                                                                                                                                                                                                                                                                              | <b>Page no.</b>                               |
|--------------------|-------------------------------------------------------------------------------------------------------------------------------------------------------------------------------------------------------------------------------------------------------------------------------------------------------------------|-----------------------------------------------|
| Preface            | The beginning of Indo-DARPP<br>The purpose of SMARPP                                                                                                                                                                                                                                                              | x<br>xii                                      |
| 1                  | <b>What is addiction?</b><br>Seven characteristics of addiction                                                                                                                                                                                                                                                   | <b>5</b><br>5                                 |
| 2                  | <b>Why should we stop using drugs?</b><br>Why drug use is a problem<br>Drugs and behavior disorder<br>Advantages and disadvantages of using drugs and stop using drugs<br>Stages of change<br>The urge to continue or to stop using drugs                                                                         | <b>11</b><br>11<br>13<br>16<br>17<br>19       |
| 3                  | <b>Recovery stage of drug addiction - First year</b><br>Stage (1) Stress phase (0-14 days)<br>Stage (2) 'Honeymoon' phase (15-90 days)<br>Stage (3) The 'wall' phase (91-180 days)<br>Stage (4) Adjustment phase (181-270 days)<br>Stage (5) Resolution phase (271-365 days)<br>Understanding our "wall" symptoms | <b>21</b><br>21<br>22<br>23<br>24<br>24<br>25 |
| 4                  | <b>"Triggers" and "cravings"</b><br>The urge to use drugs<br>Let's take action!<br>Stopping the urge to use drugs                                                                                                                                                                                                 | <b>28</b><br>28<br>31<br>32                   |
| 5                  | <b>Triggers around you</b><br>External triggers<br>Let's take action!                                                                                                                                                                                                                                             | <b>36</b><br>36<br>37                         |
| 6                  | <b>Trigger inside us</b><br>Internal trigger<br>High risk conditions: hungry, angry, lonely, tired (HALT)                                                                                                                                                                                                         | <b>42</b><br>42<br>44                         |
| 7                  | <b>Prevention of harmful behavior</b><br>Distant and self-isolating behavior<br>Drug dreams                                                                                                                                                                                                                       | <b>48</b><br>48<br>51                         |
| 8                  | <b>Let's make schedule of our daily activities</b><br>Why is scheduling so important?<br>Make your schedule and practice!<br>Calendars and marks of achievement                                                                                                                                                   | <b>54</b><br>54<br>57<br>60                   |
| 9                  | <b>Adverse effects of drugs on the brain and body</b><br>Effects of drugs on the brain<br>Effects of drugs on the body<br>Dangerous viral infections: Hepatitis C and HIV                                                                                                                                         | <b>62</b><br>62<br>65<br>67                   |
| 10                 | <b>Drug-induced psychiatric and behavioral disorders</b><br>What are psychiatric disorders?<br>If a person with psychiatric disorder addicted to drugs<br>Drug-induced psychiatric and behavioral disorders<br>Testimonials of people with comorbidities                                                          | <b>72</b><br>72<br>73<br>73<br>74             |

|    |                                                                                                                                                                                                                                                                        |                                         |
|----|------------------------------------------------------------------------------------------------------------------------------------------------------------------------------------------------------------------------------------------------------------------------|-----------------------------------------|
| 11 | <b>Amphetamine-type stimulants</b><br>Effects of amphetamine on the brain and its symptoms<br>The dangers of using amphetamine<br>Prognosis of amphetamine addiction                                                                                                   | <b>78</b><br>79<br>81<br>83             |
| 12 | <b>Opioid: Heroin, morphine and maintenance therapy</b><br>Types of opioids & how do they work<br>Symptoms and side effects of opioid usage<br>Effects on opioid use<br>Treatments & therapy for opioid addiction<br>Opioid addiction prognosis                        | <b>84</b><br>84<br>85<br>86<br>88<br>90 |
| 13 | <b>Benzodiazepine and other legal drugs</b><br>Medical use of benzodiazepines<br>The dangers of benzodiazepines<br>Other legal drugs use<br>Particular problems in benzodiazepine addiction<br>Responsible use of benzodiazepines                                      | <b>92</b><br>92<br>93<br>94<br>96<br>99 |
| 14 | <b>Alcohol use</b><br>Alcohol use in Indonesia<br>Triggers on alcohol drinking                                                                                                                                                                                         | <b>100</b><br>100<br>102                |
| 15 | <b>The dangers of alcohol on brain and body</b><br>Effects of alcohol on the brain<br>Effects of alcohol on the body<br>Liver disease<br>Heart and vascular disease                                                                                                    | <b>107</b><br>107<br>111<br>112<br>115  |
| 16 | <b>Three pillars to stop drinking alcohol</b><br>Three pillars on stop drinking alcohol<br>What are anti-alcohol drugs?<br>Types of anti-alcohol drugs                                                                                                                 | <b>118</b><br>118<br>119<br>121         |
| 17 | <b>Does marijuana not cause addiction?</b><br>Getting to know about marijuana<br>Marijuana use in Indonesia<br>Effects of marijuana on the body                                                                                                                        | <b>127</b><br>127<br>128<br>129         |
| 18 | <b>New psychoactive substances (NPS)</b><br>Types and characteristics of NPS<br>Effects of NPS on the brain and body                                                                                                                                                   | <b>132</b><br>132<br>135                |
| 19 | <b>Abstinence or relapse risk in the future</b><br>The chance of alcohol-free after treatment<br>The chance & duration of getting relapse after treatment<br>Effects of participation in self help groups on prognosis<br>Prognosis of people with substance addiction | <b>139</b><br>139<br>140<br>142<br>143  |
| 20 | <b>Preventing relapse</b><br>What is relapse?<br>What is addictive behavior?<br>What is addictive thought?<br>The accumulation of negative emotions                                                                                                                    | <b>147</b><br>147<br>148<br>150<br>150  |
| 21 | <b>Reasons a person experiencing relapse</b><br>What causes relapse?<br>Due to chance or influences of others?<br>Because of some extraordinary events, misfortunes or disasters<br>Because of the desire to achieve something                                         | <b>153</b><br>153<br>154<br>154<br>155  |



|    |                                                                      |            |
|----|----------------------------------------------------------------------|------------|
|    | Because of emotions: depression, anger, lonely, fright               | 155        |
|    | Because of perception that the addiction problems was already solved | 156        |
|    | Testing own selves                                                   | 157        |
|    | Celebrating something                                                | 157        |
| 22 | <b>Characters towards recovery: trust, honesty, friendships</b>      | <b>160</b> |
|    | Trust                                                                | 160        |
|    | Honesty                                                              | 162        |
|    | Creating new friendships                                             | 164        |
| 23 | <b>Negative relationships with other people</b>                      | <b>166</b> |
|    | Relationship without appreciation                                    | 166        |
|    | Controlling relationship (1)                                         | 168        |
|    | Controlling relationship (2)                                         | 169        |
|    | Relationship that hurts you and the drugs recovery phase             | 170        |
|    | Value yourself                                                       | 171        |
| 24 | <b>Sexual behavior, eating disorders and holidays</b>                | <b>173</b> |
|    | Sexual behavior during the recovery phase                            | 173        |
|    | Eating disorders                                                     | 175        |
|    | Getting through long holidays                                        | 177        |
| 25 | <b>Preventing relapse: becoming wiser</b>                            | <b>181</b> |
|    | Recognizing triggers and creating schedule                           | 183        |
| 26 | <b>How is your relapse cycle?</b>                                    | <b>189</b> |
