# Supplementary material for: Relapse prevention group therapy via video-conferencing for substance use disorder: protocol for a multicentre randomised controlled trial in Indonesia
Source: PubMed Central journal article supplement — BMJ Open. 2021 Sep 6;11(9):e050259. doi: 10.1136/bmjopen-2021-050259 (PMC8422497; doi:10.1136/bmjopen-2021-050259), 2021-09-06
Supplement: bmjopen-2021-050259supp003.pdf [file bmjopen-2021-050259supp003.pdf]

## Supplementary file 3

**Table of contents of Indo-DARPP (English translation)**

| <b>Chapter no.</b> | <b>Chapter title</b>                                                                                                                                                                                                                                                                                              | <b>Page no.</b>                               |
|--------------------|-------------------------------------------------------------------------------------------------------------------------------------------------------------------------------------------------------------------------------------------------------------------------------------------------------------------|-----------------------------------------------|
| Preface            | The beginning of Indo-DARPP<br>The purpose of SMARPP                                                                                                                                                                                                                                                              | x<br>xii                                      |
| 1                  | <b>What is addiction?</b><br>Seven characteristics of addiction                                                                                                                                                                                                                                                   | <b>5</b><br>5                                 |
| 2                  | <b>Why should we stop using drugs?</b><br>Why drug use is a problem<br>Drugs and behavior disorder<br>Advantages and disadvantages of using drugs and stop using drugs<br>Stages of change<br>The urge to continue or to stop using drugs                                                                         | <b>11</b><br>11<br>13<br>16<br>17<br>19       |
| 3                  | <b>Recovery stage of drug addiction - First year</b><br>Stage (1) Stress phase (0-14 days)<br>Stage (2) 'Honeymoon' phase (15-90 days)<br>Stage (3) The 'wall' phase (91-180 days)<br>Stage (4) Adjustment phase (181-270 days)<br>Stage (5) Resolution phase (271-365 days)<br>Understanding our "wall" symptoms | <b>21</b><br>21<br>22<br>23<br>24<br>24<br>25 |
| 4                  | <b>"Triggers" and "cravings"</b><br>The urge to use drugs<br>Let's take action!<br>Stopping the urge to use drugs                                                                                                                                                                                                 | <b>28</b><br>28<br>31<br>32                   |
| 5                  | <b>Triggers around you</b><br>External triggers<br>Let's take action!                                                                                                                                                                                                                                             | <b>36</b><br>36<br>37                         |
| 6                  | <b>Trigger inside us</b><br>Internal trigger<br>High risk conditions: hungry, angry, lonely, tired (HALT)                                                                                                                                                                                                         | <b>42</b><br>42<br>44                         |
| 7                  | <b>Prevention of harmful behavior</b><br>Distant and self-isolating behavior<br>Drug dreams                                                                                                                                                                                                                       | <b>48</b><br>48<br>51                         |
| 8                  | <b>Let's make schedule of our daily activities</b><br>Why is scheduling so important?<br>Make your schedule and practice!<br>Calendars and marks of achievement                                                                                                                                                   | <b>54</b><br>54<br>57<br>60                   |
| 9                  | <b>Adverse effects of drugs on the brain and body</b><br>Effects of drugs on the brain<br>Effects of drugs on the body<br>Dangerous viral infections: Hepatitis C and HIV                                                                                                                                         | <b>62</b><br>62<br>65<br>67                   |
| 10                 | <b>Drug-induced psychiatric and behavioral disorders</b><br>What are psychiatric disorders?<br>If a person with psychiatric disorder addicted to drugs<br>Drug-induced psychiatric and behavioral disorders<br>Testimonials of people with comorbidities                                                          | <b>72</b><br>72<br>73<br>73<br>74             |

|    |                                                                                                                                                                                                                                                                        |                                         |
|----|------------------------------------------------------------------------------------------------------------------------------------------------------------------------------------------------------------------------------------------------------------------------|-----------------------------------------|
| 11 | <b>Amphetamine-type stimulants</b><br>Effects of amphetamine on the brain and its symptoms<br>The dangers of using amphetamine<br>Prognosis of amphetamine addiction                                                                                                   | <b>78</b><br>79<br>81<br>83             |
| 12 | <b>Opioid: Heroin, morphine and maintenance therapy</b><br>Types of opioids & how do they work<br>Symptoms and side effects of opioid usage<br>Effects on opioid use<br>Treatments & therapy for opioid addiction<br>Opioid addiction prognosis                        | <b>84</b><br>84<br>85<br>86<br>88<br>90 |
| 13 | <b>Benzodiazepine and other legal drugs</b><br>Medical use of benzodiazepines<br>The dangers of benzodiazepines<br>Other legal drugs use<br>Particular problems in benzodiazepine addiction<br>Responsible use of benzodiazepines                                      | <b>92</b><br>92<br>93<br>94<br>96<br>99 |
| 14 | <b>Alcohol use</b><br>Alcohol use in Indonesia<br>Triggers on alcohol drinking                                                                                                                                                                                         | <b>100</b><br>100<br>102                |
| 15 | <b>The dangers of alcohol on brain and body</b><br>Effects of alcohol on the brain<br>Effects of alcohol on the body<br>Liver disease<br>Heart and vascular disease                                                                                                    | <b>107</b><br>107<br>111<br>112<br>115  |
| 16 | <b>Three pillars to stop drinking alcohol</b><br>Three pillars on stop drinking alcohol<br>What are anti-alcohol drugs?<br>Types of anti-alcohol drugs                                                                                                                 | <b>118</b><br>118<br>119<br>121         |
| 17 | <b>Does marijuana not cause addiction?</b><br>Getting to know about marijuana<br>Marijuana use in Indonesia<br>Effects of marijuana on the body                                                                                                                        | <b>127</b><br>127<br>128<br>129         |
| 18 | <b>New psychoactive substances (NPS)</b><br>Types and characteristics of NPS<br>Effects of NPS on the brain and body                                                                                                                                                   | <b>132</b><br>132<br>135                |
| 19 | <b>Abstinence or relapse risk in the future</b><br>The chance of alcohol-free after treatment<br>The chance & duration of getting relapse after treatment<br>Effects of participation in self help groups on prognosis<br>Prognosis of people with substance addiction | <b>139</b><br>139<br>140<br>142<br>143  |
| 20 | <b>Preventing relapse</b><br>What is relapse?<br>What is addictive behavior?<br>What is addictive thought?<br>The accumulation of negative emotions                                                                                                                    | <b>147</b><br>147<br>148<br>150<br>150  |
| 21 | <b>Reasons a person experiencing relapse</b><br>What causes relapse?<br>Due to chance or influences of others?<br>Because of some extraordinary events, misfortunes or disasters<br>Because of the desire to achieve something                                         | <b>153</b><br>153<br>154<br>154<br>155  |

|    |                                                                      |            |
|----|----------------------------------------------------------------------|------------|
|    | Because of emotions: depression, anger, lonely, fright               | 155        |
|    | Because of perception that the addiction problems was already solved | 156        |
|    | Testing own selves                                                   | 157        |
|    | Celebrating something                                                | 157        |
| 22 | <b>Characters towards recovery: trust, honesty, friendships</b>      | <b>160</b> |
|    | Trust                                                                | 160        |
|    | Honesty                                                              | 162        |
|    | Creating new friendships                                             | 164        |
| 23 | <b>Negative relationships with other people</b>                      | <b>166</b> |
|    | Relationship without appreciation                                    | 166        |
|    | Controlling relationship (1)                                         | 168        |
|    | Controlling relationship (2)                                         | 169        |
|    | Relationship that hurts you and the drugs recovery phase             | 170        |
|    | Value yourself                                                       | 171        |
| 24 | <b>Sexual behavior, eating disorders and holidays</b>                | <b>173</b> |
|    | Sexual behavior during the recovery phase                            | 173        |
|    | Eating disorders                                                     | 175        |
|    | Getting through long holidays                                        | 177        |
| 25 | <b>Preventing relapse: becoming wiser</b>                            | <b>181</b> |
|    | Recognizing triggers and creating schedule                           | 183        |
| 26 | <b>How is your relapse cycle?</b>                                    | <b>189</b> |
